# Supplementary material
Source: Royal Society of Chemistry journal article supplement (doi:10.1039/d6cp00332j)
Supplement: d6cp00332j1.zip [file SI2-Cartesian-Coordinates.pdf › SI2-Cartesian-Coordinates.pdf]

**Note: All the Cartesian coordinates are at the M06-2X/6-311++G(d,p) level of theory**

**Cartesian Coordinates of all the species involved in the reaction of different conformers of**  
**HFE-365mcf3 with OH.**

**A1**

0 1

|   |             |             |             |
|---|-------------|-------------|-------------|
| C | -0.15575800 | 0.75172600  | -0.04419200 |
| C | 1.08147400  | 0.74420200  | 0.84436000  |
| H | 1.64471200  | 1.65436400  | 0.59685700  |
| H | 0.73764900  | 0.80572500  | 1.87755200  |
| C | 2.61846800  | -0.50591800 | -0.46282100 |
| H | 1.98971400  | -0.72302000 | -1.32943400 |
| H | 3.17413100  | 0.42148100  | -0.64065800 |
| H | 3.31898800  | -1.32439900 | -0.31095200 |
| O | 1.85288900  | -0.40871600 | 0.72818900  |
| F | 0.16787700  | 0.95218100  | -1.34487100 |
| F | -0.95121600 | 1.77676000  | 0.33698200  |
| C | -0.99902100 | -0.53534700 | 0.01458900  |
| F | -2.17029900 | -0.35077000 | -0.58677200 |
| F | -1.22432600 | -0.87179400 | 1.28368600  |
| F | -0.37306700 | -1.53886600 | -0.59241400 |

**OH**

0 2

|   |            |            |             |
|---|------------|------------|-------------|
| O | 0.00000000 | 0.00000000 | 0.10800200  |
| H | 0.00000000 | 0.00000000 | -0.86401400 |

**CR1a**

0 2

|   |             |             |             |
|---|-------------|-------------|-------------|
| C | 0.12592300  | -0.54503300 | 0.26362200  |
| C | -0.73994900 | 0.33811000  | 1.15113400  |
| H | -1.69106500 | -0.19416300 | 1.28757600  |
| H | -0.23084800 | 0.41885300  | 2.11274700  |
| C | -1.81955400 | 1.73911300  | -0.43095800 |
| H | -1.38232900 | 1.35836000  | -1.35764700 |
| H | -2.74675800 | 1.19693200  | -0.21801500 |
| H | -2.03277000 | 2.80008000  | -0.54438300 |
| O | -0.91152300 | 1.62775000  | 0.65637100  |
| F | -0.53256800 | -0.91425400 | -0.87242400 |
| F | 0.42262000  | -1.67959500 | 0.93366600  |
| C | 1.45251600  | 0.09001100  | -0.19200800 |
| F | 2.23558600  | -0.82826400 | -0.75198400 |
| F | 2.09033300  | 0.60592200  | 0.85653000  |
| F | 1.23606100  | 1.05118000  | -1.08303800 |

|   |             |             |             |
|---|-------------|-------------|-------------|
| O | -3.14917800 | -1.31885600 | -0.27333300 |
| H | -2.61252900 | -1.89932500 | -0.84007500 |

### TS1a

0 2

|   |             |             |             |
|---|-------------|-------------|-------------|
| C | 0.10507300  | -0.58477300 | 0.00055300  |
| C | -0.95129900 | 0.04268700  | 0.89947400  |
| H | -1.92976400 | -0.56559800 | 0.66125000  |
| H | -0.69629400 | -0.16529400 | 1.93934400  |
| C | -1.72346900 | 1.81461900  | -0.48438200 |
| H | -1.00324000 | 1.74499600  | -1.30175100 |
| H | -2.60532400 | 1.20840800  | -0.70929200 |
| H | -2.01094500 | 2.85304500  | -0.33922300 |
| O | -1.14787000 | 1.39105500  | 0.74996600  |
| F | -0.31937200 | -0.65225000 | -1.28863000 |
| F | 0.32154500  | -1.84967000 | 0.41686800  |
| C | 1.46345100  | 0.14053200  | -0.00930500 |
| F | 2.37080700  | -0.58075300 | -0.65732900 |
| F | 1.88088700  | 0.32762900  | 1.24051200  |
| F | 1.35882700  | 1.32245400  | -0.60952500 |
| O | -2.99107400 | -1.27089500 | 0.01883400  |
| H | -2.51965500 | -1.62190600 | -0.75583300 |

### PC1a

0 2

|   |             |             |             |
|---|-------------|-------------|-------------|
| C | 0.13617000  | -0.50885900 | 0.17246700  |
| C | -0.71291100 | 0.28736000  | 1.10582200  |
| H | -3.06685200 | -1.35408400 | 0.67510800  |
| H | -0.51860900 | 0.12937500  | 2.15900200  |
| C | -1.69704800 | 1.77052000  | -0.49527700 |
| H | -0.89124500 | 1.77911400  | -1.22927100 |
| H | -2.44923000 | 1.02419500  | -0.75186600 |
| H | -2.14261300 | 2.75911900  | -0.42614400 |
| O | -1.18319400 | 1.49852400  | 0.81778700  |
| F | -0.44709300 | -0.69522100 | -1.04610600 |
| F | 0.33296600  | -1.73003100 | 0.72080200  |
| C | 1.53752600  | 0.07301000  | -0.11567100 |
| F | 2.23391300  | -0.71824000 | -0.92287400 |
| F | 2.20946800  | 0.21561700  | 1.02377400  |
| F | 1.42191100  | 1.27001100  | -0.69280000 |
| O | -3.28113900 | -1.19254900 | -0.24759900 |
| H | -2.55969200 | -1.59691900 | -0.73755200 |

### P1a

0 2

|   |             |            |             |
|---|-------------|------------|-------------|
| C | -0.09239500 | 0.72450700 | -0.06683200 |
| C | 1.07018700  | 0.71670300 | 0.86781700  |

|   |             |             |             |
|---|-------------|-------------|-------------|
| H | 0.88230400  | 1.09439100  | 1.86367400  |
| C | 2.57384000  | -0.56948600 | -0.47311500 |
| H | 1.85343800  | -1.17776900 | -1.01955100 |
| H | 2.83300200  | 0.31631400  | -1.05443700 |
| H | 3.46398500  | -1.15426600 | -0.25726900 |
| O | 2.05471200  | -0.18231600 | 0.80308300  |
| F | 0.28713000  | 0.78206700  | -1.37134300 |
| F | -0.84274900 | 1.81573200  | 0.19979800  |
| C | -1.03900800 | -0.49130900 | 0.04675700  |
| F | -2.06288500 | -0.38943200 | -0.79197800 |
| F | -1.51311600 | -0.58316500 | 1.28673600  |
| F | -0.37351100 | -1.61438300 | -0.23486100 |

### CR1b

0 2

|   |             |             |             |
|---|-------------|-------------|-------------|
| C | 0.59400100  | -0.83287200 | 0.13055500  |
| C | -0.85017700 | -0.89046000 | 0.58704000  |
| H | -1.05534200 | -1.94828300 | 0.79946100  |
| H | -0.95550400 | -0.30748300 | 1.51060800  |
| C | -3.04254600 | -0.65547400 | -0.17725100 |
| H | -3.23159400 | -1.73424300 | -0.15983600 |
| H | -3.35043400 | -0.20648700 | 0.77207300  |
| H | -3.60453300 | -0.19788400 | -0.98809000 |
| O | -1.67088500 | -0.40034300 | -0.43122100 |
| F | 0.76940000  | -1.53541000 | -1.00458600 |
| F | 1.36034100  | -1.39684300 | 1.09427900  |
| C | 1.16872100  | 0.57527200  | -0.10849000 |
| F | 2.45340900  | 0.50025300  | -0.43304400 |
| F | 1.05042000  | 1.30875700  | 0.99519100  |
| F | 0.52594600  | 1.19870200  | -1.09944100 |
| O | -1.96023300 | 1.96115600  | 0.41655100  |
| H | -1.40928200 | 2.04994200  | -0.37957800 |

### TS1b

0 2

|   |             |             |             |
|---|-------------|-------------|-------------|
| C | -0.46532100 | 0.28793600  | 0.73673400  |
| C | 1.04373700  | 0.20230900  | 0.67422000  |
| H | 1.45387900  | 0.53511300  | 1.63833900  |
| H | 1.34375500  | -0.92415300 | 0.59498700  |
| C | 2.92570400  | 0.91646700  | -0.49032200 |
| H | 3.35806300  | 1.39353200  | 0.39530900  |
| H | 3.30015100  | -0.10754000 | -0.57835500 |
| H | 3.18321900  | 1.48902500  | -1.37767600 |
| O | 1.50860100  | 0.90939800  | -0.40536800 |
| F | -0.86596500 | 1.53301400  | 1.06747600  |

|   |             |             |             |
|---|-------------|-------------|-------------|
| F | -0.89894800 | -0.55628600 | 1.69750600  |
| C | -1.19704300 | -0.09068700 | -0.56816200 |
| F | -2.49421900 | -0.24980700 | -0.33392200 |
| F | -0.71374900 | -1.25272700 | -1.03445400 |
| F | -1.04623000 | 0.83334500  | -1.50105800 |
| O | 1.81471000  | -2.23371700 | 0.22446700  |
| H | 1.10399700  | -2.45541400 | -0.40016000 |

### PC1b

0 2

|   |             |             |             |
|---|-------------|-------------|-------------|
| C | 0.60469200  | -0.85135500 | 0.21047900  |
| C | -0.83708700 | -0.88880100 | 0.55296400  |
| H | -1.15348300 | -0.62799500 | 1.55598700  |
| H | -1.32646700 | 2.69822000  | 0.70997000  |
| C | -3.05708200 | -0.76219200 | -0.12828500 |
| H | -3.31375000 | -1.72287600 | 0.32288000  |
| H | -3.26625700 | 0.06261900  | 0.55499600  |
| H | -3.60744800 | -0.62847100 | -1.05585300 |
| O | -1.67199100 | -0.75287900 | -0.47822300 |
| F | 0.88381100  | -1.65316800 | -0.84184900 |
| F | 1.32504300  | -1.26870000 | 1.27799500  |
| C | 1.16541500  | 0.54097600  | -0.15840800 |
| F | 2.45106600  | 0.48269500  | -0.47663100 |
| F | 1.02345100  | 1.38165200  | 0.86899100  |
| F | 0.49759700  | 1.05002400  | -1.20089800 |
| O | -1.91706300 | 2.03793300  | 0.33966500  |
| H | -1.50450100 | 1.77377500  | -0.48848200 |

### P1b

0 2

|   |             |             |             |
|---|-------------|-------------|-------------|
| C | -0.21881700 | 0.73101200  | 0.00120200  |
| C | 1.17868000  | 0.53627700  | 0.45819300  |
| H | 1.40744000  | 0.60813600  | 1.51537000  |
| C | 3.26588400  | -0.43765600 | 0.12585200  |
| H | 3.80437500  | 0.50067200  | 0.27558000  |
| H | 3.21420700  | -0.99526300 | 1.06457500  |
| H | 3.76328600  | -1.03553400 | -0.63271900 |
| O | 1.95510400  | -0.17480100 | -0.36015600 |
| F | -0.26517100 | 1.20219400  | -1.26560800 |
| F | -0.82167500 | 1.62644500  | 0.81770800  |
| C | -1.10102400 | -0.53768100 | 0.02280700  |
| F | -2.34792400 | -0.26041900 | -0.34320300 |
| F | -1.12814900 | -1.04415400 | 1.25813400  |

|   |             |             |             |
|---|-------------|-------------|-------------|
| F | -0.61246700 | -1.46087900 | -0.79924100 |
|---|-------------|-------------|-------------|

### CR1c

0 2

|   |             |             |             |
|---|-------------|-------------|-------------|
| C | -0.57635000 | 0.73197500  | -0.19361500 |
| C | 0.85427400  | 0.74071500  | 0.32619600  |
| H | 1.37944200  | 1.55490300  | -0.18939700 |
| H | 0.81188500  | 0.96111000  | 1.39343400  |
| C | 1.92232000  | -0.79176900 | -1.15499900 |
| H | 2.56975500  | -1.66337600 | -1.08252300 |
| H | 1.06667500  | -1.02346700 | -1.79087700 |
| H | 2.48481300  | 0.04787000  | -1.57774200 |
| O | 1.51028100  | -0.48727200 | 0.17713400  |
| F | -0.61239400 | 0.74202700  | -1.54736300 |
| F | -1.19140100 | 1.85449900  | 0.23803000  |
| C | -1.42072100 | -0.47002700 | 0.27048500  |
| F | -2.70387900 | -0.27068400 | -0.00806300 |
| F | -1.29198800 | -0.63082800 | 1.58672300  |
| F | -1.02840200 | -1.58440900 | -0.33951300 |
| O | 4.13470600  | 0.24692300  | 0.75010100  |
| H | 3.30297900  | -0.21504800 | 0.97249500  |

### TS1c

0 2

|   |             |             |             |
|---|-------------|-------------|-------------|
| C | 0.43424200  | -0.72092700 | -0.03785200 |
| C | -0.78813700 | -0.43581200 | 0.82349200  |
| H | -1.55471600 | -1.17626400 | 0.56597600  |
| H | -0.48968900 | -0.56164300 | 1.86415500  |
| C | -2.01290500 | 1.11896500  | -0.46683100 |
| H | -2.37325700 | 2.14418300  | -0.42197900 |
| H | -1.46600000 | 0.92269800  | -1.39304900 |
| H | -2.92793400 | 0.40376800  | -0.48969000 |
| O | -1.26759900 | 0.87505600  | 0.68767600  |
| F | 0.10140700  | -0.87809900 | -1.34172600 |
| F | 0.99015500  | -1.87854800 | 0.38175900  |
| C | 1.52568000  | 0.36508800  | 0.01478100  |
| F | 2.64702900  | -0.07577000 | -0.54514500 |
| F | 1.78334800  | 0.68843900  | 1.28116600  |
| F | 1.13527200  | 1.45688000  | -0.63708300 |
| O | -3.94295400 | -0.56421000 | -0.06028900 |
| H | -4.37214400 | 0.00050100  | 0.60321400  |

### PC1c

0 2

|   |             |             |             |
|---|-------------|-------------|-------------|
| C | -0.42905900 | 0.63932300  | -0.28011200 |
| C | 0.92453500  | 0.44676800  | 0.38274100  |
| H | 1.65630100  | 1.06991100  | -0.13873500 |
| H | 0.85118600  | 0.77396800  | 1.41883300  |
| C | 1.90013700  | -1.38886800 | -0.72461100 |
| H | 1.98407000  | -2.46519800 | -0.73471000 |
| H | 1.82110400  | -0.81336200 | -1.63817000 |
| H | 3.83713600  | -0.29724200 | 0.20230600  |
| O | 1.30624200  | -0.90832100 | 0.39712900  |
| F | -0.35560700 | 0.43536000  | -1.61643900 |
| F | -0.81883100 | 1.91787100  | -0.08045600 |
| C | -1.55220800 | -0.27311600 | 0.24979300  |
| F | -2.73288100 | 0.13917000  | -0.20129800 |
| F | -1.57288400 | -0.23515100 | 1.58252500  |
| F | -1.37124900 | -1.52924800 | -0.14051400 |
| O | 3.89624700  | 0.63289600  | 0.44748100  |
| H | 4.83292000  | 0.83866500  | 0.47235100  |

### P1c

0 2

|   |             |             |             |
|---|-------------|-------------|-------------|
| C | -0.11554300 | 0.74440900  | -0.02993400 |
| C | 1.13155000  | 0.68984300  | 0.84097000  |
| H | 1.71427600  | 1.59365400  | 0.63183700  |
| H | 0.81119800  | 0.69440800  | 1.88233700  |
| C | 2.71355900  | -0.48048900 | -0.44162800 |
| H | 3.18874000  | -1.43433700 | -0.60571500 |
| H | 2.52134000  | 0.21494200  | -1.24775000 |
| O | 1.88013100  | -0.47637300 | 0.63585400  |
| F | 0.19476000  | 0.98371100  | -1.32479400 |
| F | -0.88475200 | 1.76819800  | 0.40232200  |
| C | -0.97974100 | -0.53103900 | -0.00135700 |
| F | -2.15750800 | -0.30174100 | -0.57255100 |
| F | -1.18767500 | -0.90399600 | 1.26177900  |
| F | -0.38433100 | -1.52328500 | -0.65073900 |

### A2

0 1

|   |             |             |             |
|---|-------------|-------------|-------------|
| C | -0.26743800 | 0.75262700  | 0.02086800  |
| C | 1.16757700  | 0.66717900  | -0.45441300 |
| H | 1.15838400  | 0.42305600  | -1.52460300 |
| H | 1.60490400  | 1.66622400  | -0.32031700 |
| C | 3.18215500  | -0.43911600 | -0.07402200 |
| H | 3.72538500  | 0.50069500  | 0.07798200  |

|   |             |             |             |
|---|-------------|-------------|-------------|
| H | 3.61061500  | -1.21063200 | 0.56174600  |
| H | 3.27141000  | -0.74162200 | -1.12379800 |
| O | 1.82715600  | -0.30244500 | 0.29715000  |
| F | -0.92233500 | 1.62538200  | -0.78128200 |
| F | -0.33842300 | 1.21948900  | 1.28256200  |
| C | -1.04876900 | -0.57656200 | -0.02406500 |
| F | -2.35040900 | -0.34578100 | 0.12707900  |
| F | -0.65815800 | -1.40630000 | 0.93033300  |
| F | -0.86279700 | -1.16422700 | -1.20962800 |

## CR2a

0 2

|   |             |             |             |
|---|-------------|-------------|-------------|
| C | -0.59574600 | -0.83281100 | 0.13041400  |
| C | 0.84823800  | -0.89170200 | 0.58749500  |
| H | 0.95313000  | -0.30724800 | 1.51011300  |
| H | 1.05251200  | -1.94933500 | 0.80162200  |
| C | 3.04110400  | -0.66014100 | -0.17672700 |
| H | 3.22866600  | -1.73913800 | -0.15755400 |
| H | 3.60375100  | -0.20481100 | -0.98842900 |
| H | 3.34972500  | -0.21004400 | 0.77180700  |
| O | 1.66975200  | -0.40345100 | -0.43106400 |
| F | -1.36308200 | -1.39568900 | 1.09395600  |
| F | -0.77187900 | -1.53486400 | -1.00477700 |
| C | -1.16817200 | 0.57639400  | -0.10837500 |
| F | -2.45314400 | 0.50373600  | -0.43265500 |
| F | -0.52447900 | 1.19901900  | -1.09915300 |
| F | -1.04824100 | 1.30951600  | 0.99545500  |
| O | 1.96744900  | 1.96402200  | 0.41459000  |
| H | 1.40948800  | 2.04009200  | -0.37804300 |

## TS2a

0 2

|   |             |             |             |
|---|-------------|-------------|-------------|
| C | -0.46528000 | -0.28790400 | 0.73673100  |
| C | 1.04377200  | -0.20218100 | 0.67418200  |
| H | 1.34376000  | 0.92430700  | 0.59485500  |
| H | 1.45394200  | -0.53488400 | 1.63832500  |
| C | 2.92572100  | -0.91658100 | -0.49030200 |
| H | 3.35801300  | -1.39382200 | 0.39526800  |
| H | 3.18318000  | -1.48904600 | -1.37773200 |
| H | 3.30030200  | 0.10738700  | -0.57819000 |
| O | 1.50861800  | -0.90936900 | -0.40536200 |
| F | -0.89894900 | 0.55626200  | 1.69753000  |
| F | -0.86581300 | -1.53302300 | 1.06745800  |
| C | -1.19708300 | 0.09066400  | -0.56813700 |
| F | -2.49425400 | 0.24974200  | -0.33382400 |
| F | -1.04628800 | -0.83340600 | -1.50100300 |
| F | -0.71386800 | 1.25269400  | -1.03451000 |

|   |            |            |             |
|---|------------|------------|-------------|
| O | 1.81466700 | 2.23390100 | 0.22441700  |
| H | 1.10429900 | 2.45538800 | -0.40067400 |

### PC2a

0 2

|   |             |             |             |
|---|-------------|-------------|-------------|
| C | -0.60500900 | -0.85130900 | 0.21032100  |
| C | 0.83676200  | -0.88922400 | 0.55270500  |
| H | 1.33110000  | 2.70165400  | 0.70693500  |
| H | 1.15310700  | -0.62946200 | 1.55600700  |
| C | 3.05689200  | -0.76276500 | -0.12822300 |
| H | 3.31314000  | -1.72421600 | 0.32152800  |
| H | 3.60737700  | -0.62783400 | -1.05554800 |
| H | 3.26636300  | 0.06098900  | 0.55629200  |
| O | 1.67178200  | -0.75242300 | -0.47825400 |
| F | -1.32532200 | -1.26893000 | 1.27766500  |
| F | -0.88441400 | -1.65269100 | -0.84237400 |
| C | -1.16543000 | 0.54130100  | -0.15817900 |
| F | -2.45109000 | 0.48333100  | -0.47655200 |
| F | -0.49744100 | 1.05056500  | -1.20034800 |
| F | -1.02352800 | 1.38162100  | 0.86953500  |
| O | 1.91831100  | 2.03666200  | 0.33970300  |
| H | 1.50503900  | 1.77188000  | -0.48789200 |

### P2a

0 2

|   |             |             |             |
|---|-------------|-------------|-------------|
| C | 0.21881300  | 0.73101600  | 0.00120900  |
| C | -1.17868300 | 0.53628500  | 0.45820200  |
| H | -1.40742300 | 0.60806300  | 1.51538800  |
| C | -3.26586800 | -0.43768500 | 0.12586400  |
| H | -3.80439700 | 0.50061800  | 0.27562100  |
| H | -3.76326100 | -1.03556400 | -0.63271300 |
| H | -3.21413100 | -0.99531600 | 1.06456700  |
| O | -1.95511200 | -0.17476100 | -0.36017500 |
| F | 0.82167300  | 1.62644300  | 0.81771600  |
| F | 0.26516000  | 1.20220500  | -1.26559800 |
| C | 1.10101600  | -0.53768300 | 0.02280500  |
| F | 2.34792000  | -0.26040900 | -0.34319000 |
| F | 0.61248500  | -1.46087500 | -0.79927100 |
| F | 1.12814500  | -1.04417600 | 1.25812800  |

### CR2b

0 2

|   |             |             |            |
|---|-------------|-------------|------------|
| C | -0.41928400 | -0.55798400 | 0.41979200 |
| C | 0.81353500  | 0.14200500  | 0.94959100 |
| H | 0.49683800  | 0.87573100  | 1.70132800 |
| H | 1.43811500  | -0.62498200 | 1.42637600 |



|   |             |             |             |
|---|-------------|-------------|-------------|
| C | 2.63724100  | 1.43438000  | 0.26887900  |
| H | 3.33441700  | 0.75246300  | 0.76581800  |
| H | 3.09684900  | 1.82205300  | -0.63719500 |
| H | 2.38396900  | 2.26373700  | 0.93800000  |
| O | 1.46505700  | 0.74271000  | -0.12881500 |
| F | -1.06131000 | -1.13889700 | 1.45523300  |
| F | -0.07902300 | -1.53460100 | -0.45678400 |
| C | -1.43721700 | 0.35245300  | -0.29730800 |
| F | -2.58320500 | -0.29737300 | -0.47782700 |
| F | -0.98817700 | 0.74552800  | -1.47992600 |
| F | -1.67837600 | 1.43042700  | 0.45241300  |
| O | 2.92475500  | -1.33524000 | -0.68652900 |
| H | 2.07649200  | -1.41963800 | -1.15528400 |

## TS2b

0 2

|   |             |             |             |
|---|-------------|-------------|-------------|
| C | -0.26662800 | -0.60108500 | 0.08976100  |
| C | 0.99689100  | 0.08176000  | 0.56258500  |
| H | 0.91467600  | 0.34872800  | 1.62442000  |
| H | 1.82963000  | -0.73778000 | 0.49579900  |
| C | 2.50861000  | 1.78191700  | 0.08392400  |
| H | 3.33863100  | 1.07415800  | 0.00009600  |
| H | 2.64152100  | 2.59985600  | -0.61954100 |
| H | 2.45971400  | 2.17718000  | 1.10395300  |
| O | 1.28970000  | 1.14105100  | -0.25938400 |
| F | -0.58344500 | -1.57097900 | 0.97228700  |
| F | -0.06810400 | -1.18535200 | -1.11459700 |
| C | -1.49818900 | 0.31840600  | -0.04382500 |
| F | -2.59700400 | -0.41166100 | -0.20685500 |
| F | -1.38131400 | 1.13942700  | -1.07546400 |
| F | -1.63293500 | 1.04062700  | 1.07102100  |
| O | 2.76916500  | -1.66190300 | -0.07792200 |
| H | 2.26601700  | -1.88987600 | -0.87846400 |

## PC2b

0 2

|   |             |             |             |
|---|-------------|-------------|-------------|
| C | -0.34869500 | -0.50687900 | 0.34349200  |
| C | 0.79830700  | 0.31421200  | 0.78296600  |
| H | 1.37567000  | -0.01463100 | 1.63881700  |
| H | 3.34970000  | -2.25045000 | -0.44374100 |
| C | 2.60012600  | 1.66407000  | 0.18635000  |
| H | 3.33156000  | 0.87972500  | 0.38607400  |
| H | 2.90779900  | 2.25582900  | -0.67135400 |
| H | 2.46307000  | 2.31036800  | 1.05619300  |

|   |             |             |             |
|---|-------------|-------------|-------------|
| O | 1.35441800  | 1.06293000  | -0.16795700 |
| F | -0.78300300 | -1.25422400 | 1.37787200  |
| F | -0.00399900 | -1.37988000 | -0.66772200 |
| C | -1.56165600 | 0.27923200  | -0.19680000 |
| F | -2.55393000 | -0.55455300 | -0.49721200 |
| F | -1.23841600 | 0.96089700  | -1.28958200 |
| F | -1.99760600 | 1.13331800  | 0.72698200  |
| O | 2.98342800  | -1.36420100 | -0.41369200 |
| H | 2.13353200  | -1.42450200 | -0.86189500 |

## P2b

0 2

|   |             |             |             |
|---|-------------|-------------|-------------|
| C | 0.22997400  | 0.73787200  | -0.00632900 |
| C | -1.17833700 | 0.57524500  | 0.41746000  |
| H | -1.65764000 | 1.37196900  | 0.97491700  |
| C | -3.26444500 | -0.40632600 | 0.10254900  |
| H | -3.75577800 | 0.56550800  | 0.00793200  |
| H | -3.72317300 | -1.12040500 | -0.57565900 |
| H | -3.33788000 | -0.76561300 | 1.13123300  |
| O | -1.89837700 | -0.30310900 | -0.28065800 |
| F | 0.82476400  | 1.63157800  | 0.81540500  |
| F | 0.34580900  | 1.21604200  | -1.27837100 |
| C | 1.07456500  | -0.55368000 | 0.03858300  |
| F | 2.34349200  | -0.28369000 | -0.25289600 |
| F | 0.62244500  | -1.44835700 | -0.83277700 |
| F | 1.02915000  | -1.08726800 | 1.25900100  |

## CR2c

0 2

|   |             |             |             |
|---|-------------|-------------|-------------|
| C | 0.51990000  | -0.59602400 | 0.41280700  |
| C | -0.93627600 | -0.27012100 | 0.16286100  |
| H | -1.17481200 | -0.51695700 | -0.87875600 |
| H | -1.53034100 | -0.91994600 | 0.81848200  |
| C | -2.47578600 | 1.47914200  | 0.25205000  |
| H | -2.78663100 | 1.32297400  | -0.78851400 |
| H | -3.14372700 | 0.91995100  | 0.91865900  |
| H | -2.53212700 | 2.53953100  | 0.49013000  |
| O | -1.13579300 | 1.08382600  | 0.43908700  |
| F | 0.73198100  | -1.88289700 | 0.04763500  |
| F | 0.83194300  | -0.48311700 | 1.71971500  |
| C | 1.52733100  | 0.26686200  | -0.37439000 |
| F | 2.74076700  | -0.27746200 | -0.31366700 |
| F | 1.59989400  | 1.49838600  | 0.10684100  |

|   |             |             |             |
|---|-------------|-------------|-------------|
| F | 1.16073300  | 0.32694800  | -1.65780500 |
| O | -3.80275400 | -1.13061300 | -0.63510100 |
| H | -4.72286200 | -0.88712800 | -0.83632500 |

## TS2c

0 2

|   |             |             |             |
|---|-------------|-------------|-------------|
| C | 0.51889900  | 0.71654500  | -0.01252600 |
| C | -0.84917200 | 0.28015900  | 0.46587900  |
| H | -0.77504500 | 0.02343700  | 1.52963700  |
| H | -1.53457700 | 1.12632200  | 0.34070500  |
| C | -2.48760900 | -1.32509000 | 0.08343400  |
| H | -2.52070000 | -1.59013200 | 1.14651600  |
| H | -3.29331400 | -0.50956300 | -0.09678200 |
| H | -2.73046000 | -2.17180200 | -0.55499500 |
| O | -1.25421800 | -0.82068000 | -0.30115300 |
| F | 0.94354700  | 1.71227500  | 0.80032600  |
| F | 0.46976000  | 1.19784700  | -1.26846400 |
| C | 1.60072800  | -0.38285700 | 0.01808200  |
| F | 2.80653000  | 0.15630800  | -0.13390900 |
| F | 1.41669200  | -1.27551900 | -0.94266000 |
| F | 1.56728400  | -1.00955200 | 1.19849500  |
| O | -3.99648500 | 0.79259300  | -0.09272500 |
| H | -4.67165900 | 0.58166800  | 0.57262000  |

## PC2c

0 2

|   |             |             |             |
|---|-------------|-------------|-------------|
| C | 0.33843000  | -0.56328600 | -0.32246500 |
| C | -0.81235200 | 0.23261500  | -0.89974600 |
| H | -0.44967900 | 0.80680000  | -1.75819400 |
| H | -1.57807800 | -0.48646200 | -1.20717200 |
| C | -2.46297200 | 1.71031400  | -0.18090300 |
| H | -2.76848800 | 1.76820700  | -1.21908200 |
| H | -3.43370500 | -0.47036600 | 0.64625400  |
| H | -2.73890200 | 2.46683900  | 0.53764300  |
| O | -1.29790100 | 1.08431500  | 0.11039900  |
| F | 0.83318400  | -1.34993300 | -1.30142000 |
| F | -0.08362700 | -1.36389300 | 0.68275000  |
| C | 1.51274100  | 0.27227300  | 0.22719000  |
| F | 2.55975500  | -0.51093800 | 0.46370000  |
| F | 1.18453900  | 0.88729600  | 1.35393200  |
| F | 1.86663300  | 1.18957900  | -0.67621300 |
| O | -3.11897600 | -1.35352400 | 0.42831800  |
| H | -2.39557900 | -1.51183300 | 1.04162300  |

**P2c**

0 2

|   |             |             |             |
|---|-------------|-------------|-------------|
| C | 0.23245000  | 0.75410700  | -0.03176900 |
| C | -1.20197600 | 0.70049500  | 0.45087500  |
| H | -1.20089600 | 0.44533500  | 1.51628300  |
| H | -1.62930900 | 1.69961400  | 0.31222700  |
| C | -3.17859800 | -0.45370400 | 0.06923200  |
| H | -3.43878300 | -0.26520300 | 1.10528700  |
| H | -3.68597600 | -1.20525400 | -0.51464300 |
| O | -1.88903000 | -0.25999100 | -0.30432900 |
| F | 0.89807900  | 1.62923900  | 0.75685800  |
| F | 0.30360000  | 1.19953700  | -1.29989500 |
| C | 0.99506100  | -0.58515200 | 0.03321800  |
| F | 2.29623500  | -0.37827200 | -0.14146500 |
| F | 0.57504000  | -1.42966300 | -0.89582500 |
| F | 0.81433300  | -1.14184500 | 1.23434300  |

**A3**

0 1

|   |             |             |             |
|---|-------------|-------------|-------------|
| C | 0.06221900  | 0.22877100  | 0.12366600  |
| C | 0.99050500  | -0.93760100 | -0.20903200 |
| H | 0.57438700  | -1.84071600 | 0.24087600  |
| H | 0.99713300  | -1.04896800 | -1.30127700 |
| C | 3.04190700  | 0.24699800  | -0.29443500 |
| H | 2.99920700  | 0.16953000  | -1.38674500 |
| H | 2.70244500  | 1.24030700  | 0.00901500  |
| H | 4.06642200  | 0.09740900  | 0.04003300  |
| O | 2.26895400  | -0.77558700 | 0.31292700  |
| F | 0.32335300  | 1.30142300  | -0.66745800 |
| F | 0.21696800  | 0.62235000  | 1.40142900  |
| C | -1.42182200 | -0.11669900 | -0.07944100 |
| F | -1.61662500 | -0.54906000 | -1.32807200 |
| F | -2.19417400 | 0.93956300  | 0.12958900  |
| F | -1.78819700 | -1.08557400 | 0.75897200  |

**CR3a**

0 2

|   |             |             |             |
|---|-------------|-------------|-------------|
| C | -0.33455000 | -0.12740900 | -0.43426600 |
| C | 0.79025400  | -0.57517400 | 0.47610700  |
| H | 0.87688500  | 0.13678000  | 1.30723100  |
| H | 0.53928600  | -1.56949600 | 0.86711300  |
| C | 3.07838100  | -1.03864300 | 0.44086500  |
| H | 3.24895000  | -0.39035700 | 1.30636300  |
| H | 2.94043400  | -2.07384500 | 0.77149500  |

|   |             |             |             |
|---|-------------|-------------|-------------|
| H | 3.93478500  | -0.97950000 | -0.22685000 |
| O | 1.95183700  | -0.59789400 | -0.29769800 |
| F | -0.53807200 | -1.01381400 | -1.42726400 |
| F | -0.03947900 | 1.06614300  | -1.00698800 |
| C | -1.67117000 | 0.04843000  | 0.30581100  |
| F | -2.01741900 | -1.09894600 | 0.89256600  |
| F | -2.63334300 | 0.40528600  | -0.53164700 |
| F | -1.55601300 | 0.98264300  | 1.24892300  |
| O | 2.58784100  | 1.86573400  | 0.20401600  |
| H | 2.02369200  | 1.81866200  | -0.58729900 |

### TS3a

0 2

|   |             |             |             |
|---|-------------|-------------|-------------|
| C | 0.26317800  | -0.45320000 | 0.34986000  |
| C | -0.98662300 | -0.13195200 | -0.44270300 |
| H | -1.14738500 | 1.02699800  | -0.36646000 |
| H | -0.84888200 | -0.35100000 | -1.51050100 |
| C | -3.27565800 | -0.52041900 | -0.51994000 |
| H | -3.50205200 | 0.54782800  | -0.45485800 |
| H | -3.23480600 | -0.82770000 | -1.57044700 |
| H | -4.03664100 | -1.09699800 | -0.00007100 |
| O | -2.04274700 | -0.79595900 | 0.12649800  |
| F | 0.43784800  | -1.78202600 | 0.46850800  |
| F | 0.16720100  | 0.06573300  | 1.59747300  |
| C | 1.54159600  | 0.12235100  | -0.28350700 |
| F | 1.71903600  | -0.39583700 | -1.49973200 |
| F | 2.60146900  | -0.16357300 | 0.45868000  |
| F | 1.44160000  | 1.44429400  | -0.39981400 |
| O | -1.53169200 | 2.28877000  | 0.19356700  |
| H | -1.19406100 | 2.14038400  | 1.09351600  |

### PC3a

0 2

|   |             |             |             |
|---|-------------|-------------|-------------|
| C | -0.34044000 | -0.26927000 | -0.43968500 |
| C | 0.80558300  | -0.55321700 | 0.44201700  |
| H | 2.27345000  | 2.92819400  | 0.09045400  |
| H | 0.89198800  | -0.06403900 | 1.40441800  |
| C | 3.08651200  | -1.00496500 | 0.58447600  |
| H | 3.33453000  | 0.00570700  | 0.91165500  |
| H | 2.94353600  | -1.67309400 | 1.43680400  |
| H | 3.86642600  | -1.39408400 | -0.06434100 |
| O | 1.89526600  | -0.96441800 | -0.20151900 |
| F | -0.62973700 | -1.30378700 | -1.25716600 |
| F | -0.09826900 | 0.80283500  | -1.27989800 |
| C | -1.61332300 | 0.08623700  | 0.34534700  |
| F | -1.98680400 | -0.93359500 | 1.11427500  |
| F | -2.60778200 | 0.38056900  | -0.48090300 |
| F | -1.38726600 | 1.14225900  | 1.13126500  |

|   |            |            |             |
|---|------------|------------|-------------|
| O | 2.32179300 | 1.97527500 | -0.01037700 |
| H | 1.71232600 | 1.76322600 | -0.72490600 |

### P3a

0 2

|   |             |             |             |
|---|-------------|-------------|-------------|
| C | -0.06763900 | 0.46884900  | 0.03101700  |
| C | 1.12754700  | -0.39968000 | 0.06574700  |
| H | 1.10490400  | -1.34810000 | 0.58973300  |
| C | 3.44819000  | -0.56655200 | 0.01712700  |
| H | 3.49534600  | -0.98531600 | 1.02563400  |
| H | 3.44362500  | -1.36952400 | -0.72322800 |
| H | 4.29797100  | 0.08919800  | -0.15099300 |
| O | 2.28251500  | 0.23591900  | -0.12622700 |
| F | -0.05268500 | 1.29399900  | -1.03855400 |
| F | -0.16300300 | 1.27378500  | 1.13231500  |
| C | -1.36969100 | -0.34926500 | -0.02696300 |
| F | -1.42329700 | -1.06346200 | -1.14915600 |
| F | -2.42876500 | 0.44585000  | 0.01984000  |
| F | -1.42473900 | -1.19391900 | 1.00745400  |

### CR3b

0 2

|   |             |             |             |
|---|-------------|-------------|-------------|
| C | 0.18114500  | -0.49847700 | -0.26123500 |
| C | -0.82196900 | -0.63586300 | 0.87556700  |
| H | -0.38038400 | -1.30612400 | 1.61638100  |
| H | -0.97842800 | 0.35256500  | 1.32385800  |
| C | -3.00189300 | -0.28042400 | 0.00688600  |
| H | -3.21393800 | 0.44019100  | 0.80272100  |
| H | -2.70147400 | 0.25945100  | -0.89441700 |
| H | -3.89472900 | -0.86601100 | -0.20341900 |
| O | -2.00869500 | -1.20805400 | 0.42189100  |
| F | -0.31218300 | 0.29237500  | -1.25578700 |
| F | 0.46047200  | -1.69586800 | -0.80579100 |
| C | 1.51372800  | 0.13520800  | 0.16975200  |
| F | 1.30710900  | 1.39780900  | 0.56134100  |
| F | 2.38607300  | 0.14664200  | -0.82822400 |
| F | 2.03900700  | -0.53828600 | 1.19116300  |
| O | -1.52519800 | 2.44002400  | -0.00045000 |
| H | -0.71027300 | 2.51743800  | -0.52679200 |

### TS3b

0 2

|   |             |             |             |
|---|-------------|-------------|-------------|
| C | 0.10555300  | -0.43464600 | -0.17625700 |
| C | -0.90454700 | 0.05539400  | 0.85942300  |
| H | -0.45979000 | 0.03536400  | 1.85559400  |

|   |             |             |             |
|---|-------------|-------------|-------------|
| H | -1.11198200 | 1.17966100  | 0.59968300  |
| C | -2.83428500 | -0.65727200 | -0.31143400 |
| H | -2.95073300 | 0.36622700  | -0.67904700 |
| H | -2.35780500 | -1.27623800 | -1.07536700 |
| H | -3.80400400 | -1.07651300 | -0.05495100 |
| O | -2.07291100 | -0.65808300 | 0.89307400  |
| F | -0.21467600 | 0.00949300  | -1.42171500 |
| F | 0.13808400  | -1.77916100 | -0.22405600 |
| C | 1.53263600  | 0.06243600  | 0.10451800  |
| F | 1.53766000  | 1.39772700  | 0.13527200  |
| F | 2.37141300  | -0.34426200 | -0.83677000 |
| F | 1.95856800  | -0.38814300 | 1.28177200  |
| O | -1.43154200 | 2.42724700  | -0.03595500 |
| H | -0.79564700 | 2.40182600  | -0.77089600 |

### PC3b

0 2

|   |             |             |             |
|---|-------------|-------------|-------------|
| C | 0.18755700  | -0.41412600 | -0.19355500 |
| C | -0.70756500 | -0.37277200 | 0.98277600  |
| H | -0.26756200 | -0.29345100 | 1.96689500  |
| H | -1.87120300 | 2.32116700  | 0.80295800  |
| C | -2.63607900 | -0.99878600 | -0.27095600 |
| H | -2.82444900 | 0.00257800  | -0.65799800 |
| H | -2.06912800 | -1.59618900 | -0.98654400 |
| H | -3.56961300 | -1.49914100 | -0.02956000 |
| O | -1.92759400 | -0.89904200 | 0.97235400  |
| F | -0.29587500 | 0.29402700  | -1.26272700 |
| F | 0.39326700  | -1.67745600 | -0.67061800 |
| C | 1.56895200  | 0.18373100  | 0.12617300  |
| F | 1.43916500  | 1.46719900  | 0.47272600  |
| F | 2.36433800  | 0.11080300  | -0.93020700 |
| F | 2.14015700  | -0.46643800 | 1.13814400  |
| O | -2.18063200 | 2.26586400  | -0.10469600 |
| H | -1.37888900 | 2.18896000  | -0.62950900 |

### P3b

0 2

|   |            |             |             |
|---|------------|-------------|-------------|
| C | 0.10433400 | -0.21146900 | -0.05745100 |
| C | 0.95114800 | 0.99122700  | 0.08157900  |
| H | 0.51383100 | 1.97054700  | -0.04357200 |
| C | 2.96551400 | -0.27630700 | 0.14329000  |
| H | 2.84589700 | -0.58443700 | 1.18271300  |
| H | 2.59748900 | -1.05754600 | -0.52308700 |
| H | 4.00968800 | -0.06683300 | -0.07113400 |

|   |             |             |             |
|---|-------------|-------------|-------------|
| O | 2.27302800  | 0.95384300  | -0.08523500 |
| F | 0.36379000  | -1.15470800 | 0.89476300  |
| F | 0.28309600  | -0.85382100 | -1.25361800 |
| C | -1.39261200 | 0.12928000  | 0.04648200  |
| F | -1.66089400 | 0.68810100  | 1.22520100  |
| F | -2.12694900 | -0.96679400 | -0.08132900 |
| F | -1.73920100 | 0.98845900  | -0.91240000 |

### CR3c

0 2

|   |             |             |             |
|---|-------------|-------------|-------------|
| C | -0.25134900 | 0.13465900  | -0.06115500 |
| C | 0.48330500  | -0.98254000 | 0.66590200  |
| H | 0.13561700  | -0.99680100 | 1.70088900  |
| H | 0.23728500  | -1.93732500 | 0.18870100  |
| C | 2.58524600  | -1.30793300 | -0.41246400 |
| H | 3.63382400  | -1.07718500 | -0.23145200 |
| H | 2.44708500  | -2.39326300 | -0.42408000 |
| H | 2.27910100  | -0.87859700 | -1.36814000 |
| O | 1.85894900  | -0.73322500 | 0.67273000  |
| F | 0.08846300  | 0.16592500  | -1.36962100 |
| F | 0.08323400  | 1.32924700  | 0.47338500  |
| C | -1.78081000 | 0.00624100  | 0.01218500  |
| F | -2.15975400 | -1.15885700 | -0.51753700 |
| F | -2.37733200 | 0.98782400  | -0.64543000 |
| F | -2.17993100 | 0.03587000  | 1.28404700  |
| O | 3.31167200  | 1.57700900  | -0.00349600 |
| H | 2.59165300  | 1.19026600  | 0.52981600  |

### TS3c

0 2

|   |             |             |             |
|---|-------------|-------------|-------------|
| C | 0.20078700  | -0.02750700 | 0.10821700  |
| C | -0.37089000 | 1.37631400  | -0.05575300 |
| H | 0.22911400  | 2.06034700  | 0.54613800  |
| H | -0.28355100 | 1.64991000  | -1.11425300 |
| C | -2.66124800 | 0.85425200  | -0.37605600 |
| H | -3.62352700 | 1.29519100  | -0.12264500 |
| H | -2.44967600 | 0.92193800  | -1.44763600 |
| H | -2.77920500 | -0.27590000 | -0.11392400 |
| O | -1.68275100 | 1.47440800  | 0.40474700  |
| F | -0.32549400 | -0.87128600 | -0.82439200 |
| F | -0.09025000 | -0.53571000 | 1.31613000  |
| C | 1.72710900  | -0.07536100 | -0.06939700 |
| F | 2.05809200  | 0.44142800  | -1.25463700 |
| F | 2.17558900  | -1.31974000 | -0.00606300 |



|   |             |             |             |
|---|-------------|-------------|-------------|
| F | 2.31977200  | 0.64390800  | 0.88182200  |
| O | -3.01428800 | -1.68075800 | 0.06767900  |
| H | -2.13076800 | -1.99427800 | -0.18488800 |

### PC3c

0 2

|   |             |             |             |
|---|-------------|-------------|-------------|
| C | 0.20202600  | 0.54281900  | 0.24909200  |
| C | -0.82343800 | 0.61441900  | -0.87196900 |
| H | -0.40179500 | 1.22093100  | -1.67474100 |
| H | -1.03446300 | -0.39954500 | -1.22366700 |
| C | -3.00431300 | 0.43995400  | -0.02473300 |
| H | -3.84783900 | 0.98752100  | 0.36747100  |
| H | -3.12915300 | -0.48812900 | -0.57191600 |
| H | -1.76003400 | -1.86981300 | 0.83655000  |
| O | -1.97765500 | 1.25522100  | -0.39413100 |
| F | -0.29803900 | -0.10634500 | 1.32813500  |
| F | 0.55502700  | 1.77923800  | 0.65225700  |
| C | 1.49184400  | -0.18799300 | -0.15957200 |
| F | 1.22555600  | -1.45775000 | -0.47172500 |
| F | 2.38010400  | -0.17417100 | 0.82406700  |
| F | 2.02746700  | 0.40091900  | -1.22941600 |
| O | -1.65634200 | -2.36498700 | 0.01738700  |
| H | -0.96246900 | -3.00503500 | 0.19346200  |

### P3c

0 2

|   |             |             |             |
|---|-------------|-------------|-------------|
| C | 0.08076600  | 0.27773500  | 0.13917700  |
| C | 1.04338400  | -0.90270800 | 0.09572200  |
| H | 0.70385400  | -1.64770500 | 0.81575000  |
| H | 1.02450000  | -1.33007500 | -0.91302100 |
| C | 3.08081500  | 0.09986600  | -0.48661400 |
| H | 4.08269900  | 0.32953500  | -0.16006300 |
| H | 2.84837300  | -0.11493400 | -1.52344600 |
| O | 2.33458700  | -0.51787200 | 0.47142600  |
| F | 0.38561200  | 1.19085900  | -0.80879400 |
| F | 0.13287100  | 0.89213100  | 1.33551300  |
| C | -1.37823900 | -0.14851900 | -0.09778800 |
| F | -1.48500200 | -0.76066300 | -1.27957100 |
| F | -2.19001300 | 0.89718300  | -0.08536100 |
| F | -1.76529900 | -1.00307500 | 0.85003400  |

#### A4

0 1

|   |             |             |             |
|---|-------------|-------------|-------------|
| C | 0.11899500  | -0.04332000 | -0.92996500 |
| C | -0.93279200 | 0.38489800  | 0.07356500  |
| H | -0.66467300 | -0.03274600 | 1.05347100  |
| H | -0.92231300 | 1.48140400  | 0.13795400  |
| C | -3.21837200 | 0.24204700  | 0.48934200  |
| H | -3.32188900 | 1.32995000  | 0.57678200  |
| H | -4.12703000 | -0.17255100 | 0.05836400  |
| H | -3.06171600 | -0.18572900 | 1.48653100  |
| O | -2.15855300 | -0.09693900 | -0.37827300 |
| F | -0.14804400 | 0.45885700  | -2.15233500 |
| F | 0.16731000  | -1.38668100 | -1.03368100 |
| C | 1.53083600  | 0.43168900  | -0.54426600 |
| F | 2.42543500  | 0.03903500  | -1.43855400 |
| F | 1.87249400  | -0.06305000 | 0.64726800  |
| F | 1.56198400  | 1.76356900  | -0.46516200 |

#### CR4a

0 2

|   |             |             |             |
|---|-------------|-------------|-------------|
| C | 0.13703600  | -0.20585100 | -0.42777000 |
| C | -1.08638300 | 0.46712800  | 0.15934500  |
| H | -0.85426600 | 0.79233700  | 1.18185600  |
| H | -1.32675000 | 1.34087300  | -0.45984800 |
| C | -3.33108200 | 0.04699200  | 0.64584200  |
| H | -3.69066400 | 0.85935500  | 0.00495600  |
| H | -4.05080200 | -0.76833500 | 0.64052100  |
| H | -3.20274100 | 0.40968400  | 1.67074500  |
| O | -2.11301400 | -0.47857300 | 0.14684800  |
| F | -0.06625500 | -0.54690000 | -1.71444700 |
| F | 0.43113000  | -1.34120800 | 0.25357800  |
| C | 1.39135900  | 0.68275600  | -0.38056700 |
| F | 2.42729500  | 0.06956900  | -0.93314800 |
| F | 1.69508800  | 0.98384900  | 0.88134000  |
| F | 1.16497400  | 1.82043000  | -1.04005800 |
| O | -1.55419700 | -1.41832400 | 2.50076600  |
| H | -1.06172200 | -1.90509700 | 1.81723200  |

#### TS4a

0 2

|   |             |             |             |
|---|-------------|-------------|-------------|
| C | 0.20620600  | -0.06935000 | -0.72498300 |
| C | -0.99925000 | 0.47325300  | 0.01397800  |
| H | -0.80154200 | 0.30054800  | 1.15675900  |

|   |             |             |             |
|---|-------------|-------------|-------------|
| H | -1.09224700 | 1.55992600  | -0.11867400 |
| C | -3.28743800 | 0.17556700  | 0.28801900  |
| H | -3.49561000 | 1.23337600  | 0.09508700  |
| H | -4.09686200 | -0.43357300 | -0.10643900 |
| H | -3.18025600 | 0.00917800  | 1.36390000  |
| O | -2.10650500 | -0.22959700 | -0.38637500 |
| F | 0.00210000  | -0.07548900 | -2.05487700 |
| F | 0.45308700  | -1.34357100 | -0.33714000 |
| C | 1.48728700  | 0.74083400  | -0.46165000 |
| F | 2.51555100  | 0.21552900  | -1.11180800 |
| F | 1.76274700  | 0.75395800  | 0.84024800  |
| F | 1.32098400  | 1.99964800  | -0.87032400 |
| O | -0.71199400 | -0.39025500 | 2.40886600  |
| H | -0.29989800 | -1.20676600 | 2.07812200  |

#### PC4a

0 2

|   |             |             |             |
|---|-------------|-------------|-------------|
| C | 0.13220800  | -0.21369000 | -0.53470900 |
| C | -1.10447200 | 0.41134200  | -0.03366700 |
| H | -0.73538600 | -1.02409500 | 3.46050700  |
| H | -1.05967400 | 1.19721900  | 0.71018000  |
| C | -3.33302300 | 0.10766100  | 0.57222800  |
| H | -3.61439200 | 1.09215400  | 0.19160500  |
| H | -4.12593300 | -0.60756500 | 0.37131600  |
| H | -3.11692000 | 0.14386500  | 1.64084800  |
| O | -2.18011700 | -0.36675300 | -0.12362300 |
| F | -0.01040600 | -0.70800700 | -1.78247800 |
| F | 0.52394100  | -1.28980800 | 0.24154400  |
| C | 1.32230400  | 0.75928800  | -0.54210600 |
| F | 2.42699500  | 0.14740100  | -0.94658900 |
| F | 1.52856900  | 1.24044700  | 0.68666400  |
| F | 1.08130600  | 1.78389300  | -1.35632000 |
| O | -1.21256200 | -0.92810200 | 2.63368800  |
| H | -0.69513900 | -1.41389300 | 1.98311500  |

#### P4a

0 2

|   |             |             |             |
|---|-------------|-------------|-------------|
| C | 0.15285600  | -0.24183100 | -0.50779500 |
| C | -1.07538300 | 0.35701100  | 0.05506600  |
| H | -1.01636300 | 1.09429800  | 0.84719400  |
| C | -3.34080800 | 0.13014200  | 0.53626300  |
| H | -3.59591300 | 1.10774800  | 0.12135200  |
| H | -4.13861000 | -0.57911700 | 0.33417000  |
| H | -3.17851400 | 0.21009500  | 1.61419300  |

|   |             |             |             |
|---|-------------|-------------|-------------|
| O | -2.17452600 | -0.37993600 | -0.09845100 |
| F | -0.04756800 | -0.70295500 | -1.76151000 |
| F | 0.59962700  | -1.30738000 | 0.22373200  |
| C | 1.31169600  | 0.76933200  | -0.56043400 |
| F | 2.42254500  | 0.19155100  | -0.99420400 |
| F | 1.53844900  | 1.26811600  | 0.65870800  |
| F | 1.01290000  | 1.78037000  | -1.37339100 |

#### CR4c

0 2

|   |             |             |             |
|---|-------------|-------------|-------------|
| C | 0.27760200  | -0.36902600 | 0.05037100  |
| C | -0.94633400 | 0.24783200  | 0.69526600  |
| H | -0.65280900 | 0.64589600  | 1.67502300  |
| H | -1.30757500 | 1.06568900  | 0.05824000  |
| C | -3.08677900 | -0.31753900 | 1.43719300  |
| H | -2.88354700 | -0.00815500 | 2.46817700  |
| H | -3.52676900 | 0.51447400  | 0.87809300  |
| H | -3.77881500 | -1.15651100 | 1.43721100  |
| O | -1.89823100 | -0.76678600 | 0.80910800  |
| F | -0.04700100 | -0.95407100 | -1.12936600 |
| F | 0.81570700  | -1.31880700 | 0.83890500  |
| C | 1.38079800  | 0.65999800  | -0.24837000 |
| F | 2.44591900  | 0.07377700  | -0.77408100 |
| F | 1.74291600  | 1.27522500  | 0.87907700  |
| F | 0.93327400  | 1.57991300  | -1.10187700 |
| O | -2.95407200 | -0.31748500 | -1.51764300 |
| H | -2.23661600 | -0.97028700 | -1.59369500 |

#### TS4c

0 2

|   |             |             |             |
|---|-------------|-------------|-------------|
| C | -0.22413700 | -0.43052600 | -0.27902200 |
| C | -1.53597300 | 0.18134700  | 0.16508000  |
| H | -1.35439500 | 0.82307600  | 1.03570600  |
| H | -1.93988400 | 0.78090500  | -0.65954700 |
| C | -3.70947500 | -0.47536600 | 0.66867300  |
| H | -3.80476400 | 0.35361500  | 1.37958600  |
| H | -4.13934600 | -0.07589200 | -0.33646400 |
| H | -4.29785500 | -1.33851400 | 0.97139200  |
| O | -2.39366700 | -0.88123600 | 0.48251900  |
| F | -0.40524900 | -1.19739800 | -1.37492600 |
| F | 0.30103700  | -1.20835700 | 0.68837700  |
| C | 0.83163000  | 0.63039300  | -0.63483100 |
| F | 1.96220100  | 0.06133100  | -1.02479800 |
| F | 1.08293900  | 1.39796400  | 0.42734500  |

|   |             |             |             |
|---|-------------|-------------|-------------|
| F | 0.38337800  | 1.41159900  | -1.61773900 |
| O | -4.17267200 | 0.25080100  | -1.76061500 |
| H | -3.88982200 | -0.62054500 | -2.08553200 |

# **PC4c**

0 2

|   |             |             |             |
|---|-------------|-------------|-------------|
| C | 0.22625900  | -0.39064300 | 0.05221000  |
| C | -0.96300300 | 0.21666500  | 0.76519900  |
| H | -0.61820300 | 0.68985500  | 1.69059900  |
| H | -1.43374100 | 0.94894000  | 0.10231900  |
| C | -3.06258200 | -0.46456400 | 1.50202300  |
| H | -3.16496400 | 0.52754300  | 1.92661600  |
| H | -3.51944600 | -0.19021500 | -0.97177900 |
| H | -3.67402700 | -1.28968400 | 1.83448300  |
| O | -1.84674300 | -0.84329300 | 1.04300400  |
| F | -0.16434100 | -1.01702200 | -1.08230300 |
| F | 0.84503400  | -1.30145200 | 0.82801800  |
| C | 1.27379500  | 0.66200800  | -0.34900800 |
| F | 2.30551200  | 0.09362500  | -0.95424400 |
| F | 1.71241700  | 1.29967300  | 0.73834600  |
| F | 0.73240600  | 1.55807500  | -1.17086100 |
| O | -2.90285400 | 0.14843800  | -1.62889800 |
| H | -2.31787200 | -0.59203600 | -1.81388600 |

# **P4c**

0 2

|   |             |             |             |
|---|-------------|-------------|-------------|
| C | 0.21506400  | -0.39404800 | 0.02959200  |
| C | -1.01840100 | 0.22573300  | 0.65416300  |
| H | -0.72261200 | 0.74099800  | 1.57534100  |
| H | -1.45109100 | 0.94584100  | -0.04827700 |
| C | -3.03247400 | -0.44217800 | 1.58863000  |
| H | -2.96286400 | 0.41279800  | 2.25280600  |
| H | -3.70650000 | -1.26008800 | 1.78927300  |
| O | -1.91363000 | -0.81873700 | 0.92155600  |
| F | -0.09710700 | -1.04578200 | -1.10718800 |
| F | 0.78726300  | -1.27640300 | 0.87263800  |
| C | 1.28188400  | 0.65717200  | -0.32414800 |
| F | 2.34929600  | 0.08721300  | -0.86032300 |
| F | 1.65417500  | 1.31752000  | 0.77424500  |
| F | 0.78481700  | 1.53968700  | -1.19190900 |

**Cartesian Coordinates of all the species involved in the reaction of different conformers of**  
**HFE-365mcf3 with Cl.**

**CR5a**

0 2

|    |             |             |             |
|----|-------------|-------------|-------------|
| C  | 0.29909300  | -0.42557200 | 0.35620600  |
| C  | -0.16151000 | 0.75690400  | 1.19778700  |
| H  | -1.20973500 | 0.56140300  | 1.46349200  |
| H  | 0.44235900  | 0.75811800  | 2.10626000  |
| C  | -0.92368700 | 2.28448900  | -0.45061300 |
| H  | -0.73681500 | 1.69139000  | -1.34931700 |
| H  | -1.94646900 | 2.10386500  | -0.10260800 |
| H  | -0.80016400 | 3.33995900  | -0.68390100 |
| O  | 0.01252200  | 1.98951500  | 0.57562600  |
| F  | -0.55339000 | -0.66374800 | -0.67836900 |
| F  | 0.30543000  | -1.53155200 | 1.13018500  |
| C  | 1.70278300  | -0.27432400 | -0.25913900 |
| F  | 2.11566700  | -1.43386600 | -0.76118200 |
| F  | 2.56638200  | 0.11227800  | 0.67811800  |
| F  | 1.69549700  | 0.62490300  | -1.23710900 |
| Cl | -3.32445300 | -0.72894100 | -0.19348100 |

**TS5a**

0 2

|    |             |             |             |
|----|-------------|-------------|-------------|
| C  | 0.31365600  | -0.49798400 | -0.10410300 |
| C  | -0.62073800 | 0.24579000  | 0.84080600  |
| H  | -1.78632300 | -0.26687400 | 0.50885200  |
| H  | -0.48680400 | -0.08180300 | 1.87114200  |
| C  | -0.99624300 | 2.19288000  | -0.49100700 |
| H  | -0.12705500 | 2.15664600  | -1.14710200 |
| H  | -1.84416900 | 1.68272900  | -0.95343500 |
| H  | -1.25146500 | 3.22324100  | -0.26124700 |
| O  | -0.70368900 | 1.58273500  | 0.77396300  |
| F  | -0.01595300 | -0.31140500 | -1.39724200 |
| F  | 0.22619600  | -1.81071000 | 0.17407300  |
| C  | 1.79514500  | -0.09349100 | 0.05161800  |
| F  | 2.56983700  | -0.85392500 | -0.70700100 |
| F  | 2.16777700  | -0.22930300 | 1.32186300  |
| F  | 1.96205400  | 1.17866700  | -0.30730100 |
| Cl | -3.17734100 | -0.71875900 | 0.01451000  |

**PC5a**

0 2

|   |             |             |             |
|---|-------------|-------------|-------------|
| C | 0.45278200  | -0.50440500 | -0.00693600 |
| C | -0.42057900 | 0.23963500  | 0.95426300  |
| H | -2.49273000 | -0.63019200 | 0.48141300  |

|    |             |             |             |
|----|-------------|-------------|-------------|
| H  | -0.36681100 | -0.09070300 | 1.98461200  |
| C  | -0.98464000 | 2.08240200  | -0.47499900 |
| H  | -0.07059300 | 2.11881900  | -1.06643800 |
| H  | -1.74670800 | 1.49358900  | -0.98671500 |
| H  | -1.34823400 | 3.08838700  | -0.28626800 |
| O  | -0.72823500 | 1.52727700  | 0.82334600  |
| F  | 0.02309100  | -0.39700200 | -1.28814900 |
| F  | 0.43044900  | -1.81056400 | 0.33700500  |
| C  | 1.93693700  | -0.07605900 | -0.00651600 |
| F  | 2.65022100  | -0.80554500 | -0.85312400 |
| F  | 2.44694100  | -0.21593400 | 1.21432700  |
| F  | 2.03719500  | 1.20682800  | -0.36216200 |
| Cl | -3.66747800 | -0.61456500 | -0.05525300 |

### P5a

0 2

|   |             |             |             |
|---|-------------|-------------|-------------|
| C | -0.09232400 | 0.72450900  | -0.06676400 |
| C | 1.07040600  | 0.71675400  | 0.86770700  |
| H | 0.88279600  | 1.09516800  | 1.86333700  |
| C | 2.57373400  | -0.56972300 | -0.47319400 |
| H | 1.85291900  | -1.17724800 | -1.01986600 |
| H | 2.83352300  | 0.31621300  | -1.05400800 |
| H | 3.46343000  | -1.15512300 | -0.25723700 |
| O | 2.05459800  | -0.18256000 | 0.80314500  |
| F | 0.28720600  | 0.78214600  | -1.37134400 |
| F | -0.84248300 | 1.81578100  | 0.19984800  |
| C | -1.03902900 | -0.49125900 | 0.04676200  |
| F | -2.06320100 | -0.38897000 | -0.79156600 |
| F | -1.51273000 | -0.58347300 | 1.28690300  |
| F | -0.37392300 | -1.61439800 | -0.23544700 |

### CR5b

0 2

|   |             |             |             |
|---|-------------|-------------|-------------|
| C | -1.00596700 | 0.75215200  | 0.18378700  |
| C | 0.38497700  | 1.12970600  | 0.65734500  |
| H | 0.34113500  | 2.20229000  | 0.88049100  |
| H | 0.61994000  | 0.57777900  | 1.57429700  |
| C | 2.46420200  | 1.69187900  | -0.29866600 |
| H | 2.17626900  | 2.73485500  | -0.46019300 |
| H | 2.96846800  | 1.58534700  | 0.66648300  |
| H | 3.12870500  | 1.36176900  | -1.09337100 |
| O | 1.31279300  | 0.86015200  | -0.35989900 |
| F | -1.34917700 | 1.47756300  | -0.89833800 |
| F | -1.87108300 | 1.05331800  | 1.18073600  |
| C | -1.22537200 | -0.73152500 | -0.16421600 |
| F | -2.51156500 | -0.94988300 | -0.42317500 |
| F | -0.86913400 | -1.48915600 | 0.87266600  |

|    |             |             |             |
|----|-------------|-------------|-------------|
| F  | -0.51524300 | -1.08614300 | -1.22464100 |
| Cl | 2.38834800  | -1.37928400 | 0.20451500  |

## TS5b

0 2

|    |             |             |             |
|----|-------------|-------------|-------------|
| C  | -0.72602500 | 0.11362300  | 0.76089400  |
| C  | 0.70700000  | 0.58595500  | 0.64074900  |
| H  | 1.13560100  | 0.82689900  | 1.62120400  |
| H  | 1.40218800  | -0.45366500 | 0.32074600  |
| C  | 2.14093600  | 2.13022700  | -0.35875500 |
| H  | 2.36490400  | 2.59284600  | 0.60590100  |
| H  | 2.89523600  | 1.37694500  | -0.60101700 |
| H  | 2.09457400  | 2.88508900  | -1.13809400 |
| O  | 0.85537000  | 1.51436300  | -0.31709900 |
| F  | -1.47880100 | 1.06728800  | 1.35187100  |
| F  | -0.74454000 | -0.97618000 | 1.55058000  |
| C  | -1.40651700 | -0.25260800 | -0.57505000 |
| F  | -2.55797600 | -0.86933800 | -0.33411500 |
| F  | -0.62056000 | -1.06665600 | -1.27170200 |
| F  | -1.65263600 | 0.83405700  | -1.29448100 |
| Cl | 2.49781100  | -1.51227900 | -0.06460900 |

## PC5b

0 2

|    |             |             |             |
|----|-------------|-------------|-------------|
| C  | -1.05799100 | 0.44660200  | 0.59548200  |
| C  | 0.30426200  | 1.02431500  | 0.60748600  |
| H  | 0.68641700  | 1.44626500  | 1.53006300  |
| H  | 1.75383800  | -1.33625500 | 0.02701800  |
| C  | 1.97317300  | 2.19254100  | -0.53016100 |
| H  | 1.78030600  | 3.13079200  | -0.00488200 |
| H  | 2.76522000  | 1.62987900  | -0.03314900 |
| H  | 2.24787800  | 2.39254400  | -1.56196600 |
| O  | 0.77869200  | 1.41387800  | -0.57564700 |
| F  | -2.02846200 | 1.37798200  | 0.36406100  |
| F  | -1.31050900 | -0.09516000 | 1.80755400  |
| C  | -1.28315500 | -0.65981000 | -0.45813600 |
| F  | -2.46279500 | -1.23731700 | -0.27797400 |
| F  | -0.33666700 | -1.60556100 | -0.33384100 |
| F  | -1.22777900 | -0.17576900 | -1.68962700 |
| Cl | 3.01264600  | -1.23374800 | 0.26638300  |

## P5b

0 2



|   |             |             |             |
|---|-------------|-------------|-------------|
| C | 0.23096200  | 0.73871100  | 0.00631500  |
| C | -1.17825100 | 0.57866400  | -0.41549400 |
| H | -1.65952100 | 1.38121700  | -0.96292700 |
| C | -3.26361300 | -0.40488100 | -0.10136200 |
| H | -3.75437400 | 0.56625800  | 0.00287100  |
| H | -3.34068400 | -0.75577700 | -1.13268600 |
| H | -3.72026300 | -1.12436200 | 0.57253100  |
| O | -1.89624100 | -0.30510700 | 0.27800000  |
| F | 0.34982800  | 1.21824100  | 1.27760900  |
| F | 0.82640600  | 1.63068600  | -0.81701800 |
| C | 1.07274400  | -0.55468600 | -0.03848100 |
| F | 2.34336100  | -0.28603600 | 0.24692700  |
| F | 1.02130000  | -1.09169700 | -1.25711800 |
| F | 0.62285300  | -1.44600800 | 0.83741600  |

## HCl

|     |            |            |             |
|-----|------------|------------|-------------|
| 0 1 |            |            |             |
| H   | 0.00000000 | 0.00000000 | -1.21203700 |
| Cl  | 0.00000000 | 0.00000000 | 0.06939500  |

## CR5c

|     |             |             |             |
|-----|-------------|-------------|-------------|
| 0 2 |             |             |             |
| C   | 0.91401900  | -0.43886700 | 0.62125300  |
| C   | -0.58029200 | -0.19732500 | 0.78150300  |
| H   | -0.98007100 | -1.02362800 | 1.38174200  |
| H   | -0.71187000 | 0.73975800  | 1.32263600  |
| C   | -1.44643400 | -1.27564000 | -1.17260100 |
| H   | -2.15929800 | -1.04119600 | -1.95945100 |
| H   | -0.50572900 | -1.61353900 | -1.61019800 |
| H   | -1.85882800 | -2.04918000 | -0.51830000 |
| O   | -1.25141900 | -0.06480700 | -0.44252200 |
| F   | 1.16799500  | -1.69659600 | 0.18830800  |
| F   | 1.49409300  | -0.30023000 | 1.83263300  |
| C   | 1.62321300  | 0.52441900  | -0.34930900 |
| F   | 2.94116700  | 0.40353000  | -0.24019900 |
| F   | 1.28573600  | 1.78056000  | -0.06628400 |
| F   | 1.28081800  | 0.25882400  | -1.60674300 |
| Cl  | -3.55083400 | 0.57740700  | 0.27466100  |

## TS5c

|     |             |             |             |
|-----|-------------|-------------|-------------|
| 0 2 |             |             |             |
| C   | 0.82164800  | -0.69048800 | -0.10296800 |
| C   | -0.43222100 | -0.39561700 | 0.70610800  |

|    |             |             |             |
|----|-------------|-------------|-------------|
| H  | -1.20017200 | -1.12117600 | 0.41777100  |
| H  | -0.19531000 | -0.51257400 | 1.76236900  |
| C  | -1.65556800 | 1.16729400  | -0.56133500 |
| H  | -1.89235600 | 2.22326500  | -0.64645900 |
| H  | -1.38575400 | 0.64100400  | -1.47753500 |
| H  | -2.86582500 | 0.58329400  | -0.29950800 |
| O  | -0.88153300 | 0.93031800  | 0.52709000  |
| F  | 0.54828600  | -0.73315000 | -1.42792900 |
| F  | 1.27937800  | -1.90351000 | 0.26568900  |
| C  | 1.96919700  | 0.32117000  | 0.08641500  |
| F  | 3.08772300  | -0.14446900 | -0.45365900 |
| F  | 2.17531500  | 0.52733100  | 1.38647600  |
| F  | 1.67231500  | 1.48097100  | -0.49041100 |
| Cl | -4.02904800 | -0.27735700 | 0.10210800  |

### PC5c

0 2

|    |             |             |             |
|----|-------------|-------------|-------------|
| C  | 0.84011200  | -0.64822900 | -0.27273700 |
| C  | -0.52066000 | -0.42175900 | 0.36777800  |
| H  | -1.24789300 | -1.03991800 | -0.16887300 |
| H  | -0.46896700 | -0.74247000 | 1.40727400  |
| C  | -1.43360200 | 1.42617100  | -0.77100000 |
| H  | -1.55630700 | 2.49899500  | -0.75506600 |
| H  | -1.27136900 | 0.88781000  | -1.69718500 |
| H  | -3.38844100 | 0.61093900  | -0.21744100 |
| O  | -0.88410000 | 0.93768400  | 0.36752900  |
| F  | 0.78754800  | -0.45874100 | -1.61147700 |
| F  | 1.19862900  | -1.93044200 | -0.05107600 |
| C  | 1.96937200  | 0.25195300  | 0.26572500  |
| F  | 3.14868400  | -0.18581500 | -0.15940000 |
| F  | 1.96298300  | 0.23066600  | 1.59842200  |
| F  | 1.81241700  | 1.50487300  | -0.14488200 |
| Cl | -4.13634700 | -0.34179500 | 0.25106900  |

### P5c

0 2

|   |             |             |             |
|---|-------------|-------------|-------------|
| C | -0.11550200 | 0.74428300  | -0.02962500 |
| C | 1.13143000  | 0.68876300  | 0.84131000  |
| H | 1.71440700  | 1.59254300  | 0.63279100  |
| H | 0.81104700  | 0.69237400  | 1.88267100  |
| C | 2.71558600  | -0.47936300 | -0.44068100 |
| H | 3.19182200  | -1.43262600 | -0.60527200 |
| H | 2.52352100  | 0.21593200  | -1.24701500 |
| O | 1.87965900  | -0.47758100 | 0.63492900  |

|   |             |             |             |
|---|-------------|-------------|-------------|
| F | 0.19515500  | 0.98387700  | -1.32433700 |
| F | -0.88442700 | 1.76817700  | 0.40288000  |
| C | -0.98019500 | -0.53092400 | -0.00162100 |
| F | -2.15789100 | -0.30065500 | -0.57254200 |
| F | -1.18816600 | -0.90438100 | 1.26134200  |
| F | -0.38533700 | -1.52303300 | -0.65166500 |

### CR6a

0 2

|    |             |             |             |
|----|-------------|-------------|-------------|
| C  | 0.74115100  | 0.20325900  | 0.79852100  |
| C  | -0.73476800 | 0.54971200  | 0.85337600  |
| H  | -1.32709600 | -0.37132500 | 0.81562100  |
| H  | -0.88803600 | 1.04044100  | 1.82182700  |
| C  | -2.16278600 | 2.25260200  | 0.07045000  |
| H  | -1.92192200 | 2.92077500  | 0.90249500  |
| H  | -2.34769000 | 2.83204800  | -0.83075300 |
| H  | -3.04911300 | 1.65731100  | 0.30979700  |
| O  | -1.05102600 | 1.41116300  | -0.20786400 |
| F  | 1.00808800  | -0.60766100 | 1.84942200  |
| F  | 1.49176800  | 1.31443800  | 0.92900600  |
| C  | 1.21960000  | -0.53324500 | -0.46610800 |
| F  | 2.48766800  | -0.90672000 | -0.31922000 |
| F  | 1.12936900  | 0.24193000  | -1.53636500 |
| F  | 0.47734600  | -1.62417300 | -0.65331100 |
| Cl | -2.07090500 | -0.02607800 | -2.04647300 |

### TS6a

0 2

|    |             |             |             |
|----|-------------|-------------|-------------|
| C  | 0.71389100  | -0.02205000 | 0.75713900  |
| C  | -0.68191000 | 0.55713000  | 0.67054600  |
| H  | -1.43355800 | -0.38610800 | 0.21620600  |
| H  | -1.11777600 | 0.70844000  | 1.66566900  |
| C  | -1.98593900 | 2.30339700  | -0.15964500 |
| H  | -2.20313900 | 2.66259500  | 0.84960600  |
| H  | -1.87134700 | 3.14041000  | -0.84198900 |
| H  | -2.78155200 | 1.63693600  | -0.50310900 |
| O  | -0.74465900 | 1.60147300  | -0.17045300 |
| F  | 0.64177500  | -1.19758900 | 1.40858000  |
| F  | 1.51161200  | 0.80092600  | 1.47253900  |
| C  | 1.40282400  | -0.26991500 | -0.60162500 |
| F  | 2.50187900  | -0.99305700 | -0.41833300 |
| F  | 1.74309400  | 0.87617900  | -1.17583200 |
| F  | 0.58135100  | -0.93338000 | -1.40829300 |
| Cl | -2.58008400 | -1.32282900 | -0.31552600 |

**PC6a**

0 2

|    |             |             |             |
|----|-------------|-------------|-------------|
| C  | 0.78955800  | 0.22635300  | 0.90353600  |
| C  | -0.58372200 | 0.77677200  | 0.88261400  |
| H  | -1.73071900 | -1.10156700 | -0.90288000 |
| H  | -1.17404200 | 0.74925000  | 1.79142400  |
| C  | -2.07291800 | 2.36809600  | 0.04977700  |
| H  | -2.07498900 | 2.94933000  | 0.97481500  |
| H  | -2.13678000 | 3.03217800  | -0.80754100 |
| H  | -2.90334300 | 1.66001200  | 0.03942400  |
| O  | -0.83610300 | 1.66832200  | -0.07532200 |
| F  | 0.83402400  | -0.79569100 | 1.78654400  |
| F  | 1.72242900  | 1.14022800  | 1.30087000  |
| C  | 1.29133700  | -0.31699900 | -0.45209200 |
| F  | 2.45255200  | -0.93838700 | -0.30047800 |
| F  | 1.43892100  | 0.65487100  | -1.33955200 |
| F  | 0.40868600  | -1.20449900 | -0.94118400 |
| Cl | -3.01623300 | -1.06952500 | -0.89803900 |

**P6**

0 2

|   |             |             |             |
|---|-------------|-------------|-------------|
| C | 0.21884800  | 0.73103600  | 0.00113800  |
| C | -1.17875100 | 0.53661300  | 0.45784800  |
| H | -1.40815200 | 0.61017200  | 1.51475800  |
| C | -3.26587100 | -0.43754700 | 0.12581400  |
| H | -3.80439800 | 0.50091800  | 0.27461800  |
| H | -3.76305200 | -1.03608700 | -0.63236900 |
| H | -3.21449200 | -0.99431000 | 1.06506800  |
| O | -1.95497900 | -0.17518700 | -0.36003400 |
| F | 0.82168300  | 1.62641700  | 0.81768700  |
| F | 0.26558400  | 1.20216500  | -1.26575700 |
| C | 1.10087900  | -0.53776600 | 0.02290700  |
| F | 2.34793100  | -0.26049000 | -0.34266200 |
| F | 0.61263700  | -1.46078500 | -0.79946600 |
| F | 1.12764100  | -1.04433200 | 1.25819200  |

**CR6b (Optimized at the MP2/6-311++G(d,p) level of theory)**

0 2

|   |             |             |             |
|---|-------------|-------------|-------------|
| C | -0.65102300 | 0.13118700  | -0.44634600 |
| C | 0.76628900  | -0.16932200 | -0.88952300 |
| H | 0.72990100  | -1.02599000 | -1.57476100 |
| H | 1.12775300  | 0.71521700  | -1.43326400 |
| C | 2.85895100  | -0.86932000 | -0.14429800 |
| H | 3.36415800  | -0.08484200 | -0.72058000 |

|    |             |             |             |
|----|-------------|-------------|-------------|
| H  | 3.40946600  | -1.05661000 | 0.77650300  |
| H  | 2.80620400  | -1.78932700 | -0.73882800 |
| O  | 1.55325600  | -0.45108900 | 0.23903800  |
| F  | -1.40788600 | 0.26131100  | -1.57007200 |
| F  | -0.71585600 | 1.29535800  | 0.23734400  |
| C  | -1.31100800 | -0.95623900 | 0.42461200  |
| F  | -2.62136100 | -0.72578600 | 0.53017100  |
| F  | -0.78881800 | -0.98665600 | 1.64553100  |
| F  | -1.13710800 | -2.15437100 | -0.15316100 |
| Cl | 2.09777300  | 1.65358100  | 1.86628300  |

**TS6b** (*Optimized at the MP2/6-311++G(d,p) level of theory*)

0 2

|    |             |             |             |
|----|-------------|-------------|-------------|
| C  | -0.29087200 | 0.72902800  | 0.00754400  |
| C  | 1.13968300  | 0.56806400  | -0.46810500 |
| H  | 1.18292300  | 0.22341400  | -1.51013100 |
| H  | 1.54681500  | 1.70317100  | -0.52385200 |
| C  | 3.19243000  | -0.44208800 | -0.06721800 |
| H  | 3.74537600  | 0.49206200  | -0.20752700 |
| H  | 3.67067200  | -1.05109500 | 0.69726300  |
| H  | 3.14091100  | -0.99481600 | -1.01171400 |
| O  | 1.87457100  | -0.16033100 | 0.41337900  |
| F  | -0.94142500 | 1.49737400  | -0.90035300 |
| F  | -0.33281900 | 1.34402600  | 1.20581300  |
| C  | -1.07568500 | -0.59427200 | 0.12860900  |
| F  | -2.36488300 | -0.34479800 | 0.35014000  |
| F  | -0.60720800 | -1.34229100 | 1.12249400  |
| F  | -0.96275700 | -1.27978800 | -1.01879600 |
| Cl | 2.29986200  | 3.15943300  | -0.59483800 |

**PC6b** (*Optimized at the MP2/6-311++G(d,p) level of theory*)

0 2

|    |             |             |             |
|----|-------------|-------------|-------------|
| C  | -0.72870400 | -0.10061100 | -0.77890900 |
| C  | 0.64293500  | -0.55760300 | -1.12869400 |
| H  | 0.76651800  | -1.49686000 | -1.65919100 |
| H  | 1.55972500  | 1.10268400  | 1.35630800  |
| C  | 2.91296100  | -0.64410600 | -0.58122200 |
| H  | 3.23813200  | -0.27426700 | -1.55637000 |
| H  | 3.56546900  | -0.26672900 | 0.20374300  |
| H  | 2.90305500  | -1.73766600 | -0.56930600 |
| O  | 1.60210100  | -0.14128300 | -0.28337100 |
| F  | -1.56415400 | -0.41889900 | -1.80005800 |
| F  | -0.75434200 | 1.24516000  | -0.59135100 |
| C  | -1.32855600 | -0.72763500 | 0.49855800  |
| F  | -2.58010900 | -0.31806700 | 0.69308700  |
| F  | -0.59557100 | -0.38787700 | 1.56290200  |
| F  | -1.32753600 | -2.06223600 | 0.38801000  |
| Cl | 2.15793300  | 1.63467000  | 2.35528500  |

**P6b** (*Optimized at the MP2/6-311++G(d,p) level of theory*)

0 2

|   |             |             |             |
|---|-------------|-------------|-------------|
| C | -0.72153800 | -0.09643900 | -0.77048300 |
| C | 0.65265100  | -0.54707600 | -1.11544500 |
| H | 0.77110100  | -1.48465300 | -1.65093100 |
| C | 2.91174000  | -0.64614800 | -0.58772700 |
| H | 3.23802800  | -0.28433100 | -1.56634100 |
| H | 3.57761000  | -0.27640100 | 0.18941100  |
| H | 2.89533500  | -1.74045500 | -0.57576700 |
| O | 1.61410900  | -0.12948300 | -0.28008100 |
| F | -1.55001100 | -0.43123300 | -1.79658000 |
| F | -0.76921500 | 1.24852900  | -0.59412700 |
| C | -1.33099300 | -0.72583100 | 0.50141400  |
| F | -2.59042300 | -0.32429000 | 0.67787900  |
| F | -0.62125800 | -0.38902900 | 1.57897200  |
| F | -1.32493500 | -2.06183700 | 0.38763400  |

**CR6c**

0 2

|    |             |             |             |
|----|-------------|-------------|-------------|
| C  | -0.73034100 | -0.37040000 | 0.66118800  |
| C  | 0.38128000  | 0.57511500  | 1.07127400  |
| H  | -0.08253100 | 1.48067300  | 1.47856800  |
| H  | 0.96783700  | 0.07925600  | 1.85480100  |
| C  | 2.05760300  | 1.95304400  | 0.17360500  |
| H  | 2.72704800  | 1.72869700  | 1.00979900  |
| H  | 2.64072800  | 2.07161800  | -0.73631500 |
| H  | 1.49342700  | 2.86793400  | 0.37904200  |
| O  | 1.16203400  | 0.87384500  | -0.05345000 |
| F  | -1.56236400 | -0.50927800 | 1.71989500  |
| F  | -0.25591100 | -1.58775700 | 0.34489100  |
| C  | -1.58118400 | 0.11958500  | -0.52977600 |
| F  | -2.70504200 | -0.58548100 | -0.60908400 |
| F  | -0.92829600 | -0.00010500 | -1.67474700 |
| F  | -1.90332200 | 1.40465400  | -0.34867200 |
| Cl | 2.84632200  | -1.02242900 | -0.39450500 |

**TS6c**

0 2

|   |             |             |             |
|---|-------------|-------------|-------------|
| C | -0.88957300 | -0.72788400 | -0.00478700 |
| C | 0.46543500  | -0.25379500 | 0.48085100  |
| H | 0.37994800  | 0.05050200  | 1.52861900  |
| H | 1.16840100  | -1.08893800 | 0.39065700  |
| C | 1.94375700  | 1.51087600  | 0.12404000  |

|    |             |             |             |
|----|-------------|-------------|-------------|
| H  | 3.03317200  | 0.67504500  | 0.00700000  |
| H  | 2.18919300  | 2.34240500  | -0.52908600 |
| H  | 1.96504000  | 1.69807300  | 1.20051600  |
| O  | 0.87441700  | 0.82346100  | -0.33260000 |
| F  | -1.29053400 | -1.72111800 | 0.81847900  |
| F  | -0.81315400 | -1.21900600 | -1.25331700 |
| C  | -1.99500400 | 0.34849600  | 0.00709900  |
| F  | -3.18459300 | -0.21270400 | -0.16391800 |
| F  | -1.80593800 | 1.24398900  | -0.95120200 |
| F  | -1.98716400 | 0.97744900  | 1.18678300  |
| Cl | 4.05021500  | -0.42049600 | -0.01832600 |

### PC6c

0 2

|    |             |             |             |
|----|-------------|-------------|-------------|
| C  | 0.74000800  | -0.64292200 | -0.20906500 |
| C  | -0.40091100 | 0.15930700  | -0.80013700 |
| H  | -0.06325000 | 0.61534600  | -1.73615600 |
| H  | -1.22300700 | -0.53738800 | -0.99552600 |
| C  | -1.74641800 | 1.98736900  | -0.27285400 |
| H  | -3.34090700 | 0.56006500  | 0.19056500  |
| H  | -1.94809400 | 2.78018100  | 0.43249900  |
| H  | -1.87583200 | 2.13688000  | -1.34028100 |
| O  | -0.77729800 | 1.14139100  | 0.13584800  |
| F  | 1.13765200  | -1.53466000 | -1.14465400 |
| F  | 0.34102300  | -1.32460100 | 0.87862300  |
| C  | 1.98181900  | 0.18243300  | 0.18729400  |
| F  | 3.00938000  | -0.62387600 | 0.42678600  |
| F  | 1.75484700  | 0.91035500  | 1.27036600  |
| F  | 2.31074300  | 0.99962800  | -0.81777200 |
| Cl | -3.86825400 | -0.62617300 | 0.20062000  |

### P6c

0 2

|   |             |             |             |
|---|-------------|-------------|-------------|
| C | -0.23226000 | 0.75393000  | 0.03202500  |
| C | 1.20202700  | 0.70006800  | -0.45101600 |
| H | 1.20054700  | 0.44568400  | -1.51661500 |
| H | 1.62982800  | 1.69887300  | -0.31164000 |
| C | 3.17909900  | -0.45316600 | -0.06868000 |
| H | 3.68606700  | -1.20590300 | 0.51402500  |
| H | 3.44096400  | -0.26145200 | -1.10371600 |
| O | 1.88879600  | -0.26129100 | 0.30330800  |
| F | -0.89781400 | 1.62960200  | -0.75618700 |
| F | -0.30309100 | 1.19892900  | 1.30028400  |
| C | -0.99532600 | -0.58502100 | -0.03333600 |

|   |             |             |             |
|---|-------------|-------------|-------------|
| F | -2.29643800 | -0.37753900 | 0.14124600  |
| F | -0.57559100 | -1.42983000 | 0.89564400  |
| F | -0.81473300 | -1.14135600 | -1.23459500 |

### CR7a

0 2

|    |             |             |             |
|----|-------------|-------------|-------------|
| C  | -0.09840900 | 0.65140700  | 0.36138000  |
| C  | 0.81759500  | 0.07421800  | -0.70089700 |
| H  | 0.38954700  | -0.85904700 | -1.08636500 |
| H  | 0.89313700  | 0.80614500  | -1.51339600 |
| C  | 3.10587300  | -0.31775300 | -1.05724500 |
| H  | 2.88133800  | -1.15205400 | -1.72913900 |
| H  | 3.23907700  | 0.60278800  | -1.63365700 |
| H  | 4.01035700  | -0.53856300 | -0.49559500 |
| O  | 2.06661400  | -0.14689600 | -0.10419900 |
| F  | 0.35629200  | 1.85392000  | 0.77197100  |
| F  | -0.16961400 | -0.15482800 | 1.43499700  |
| C  | -1.53286100 | 0.85940500  | -0.15524100 |
| F  | -1.51924000 | 1.66357600  | -1.22163100 |
| F  | -2.29941300 | 1.40262400  | 0.77704500  |
| F  | -2.06273200 | -0.30752000 | -0.52148000 |
| Cl | 1.98023700  | -2.50954900 | 0.86953100  |

### TS7a

0 2

|    |             |             |             |
|----|-------------|-------------|-------------|
| C  | -0.01844300 | 0.50326800  | 0.65442700  |
| C  | 0.90106900  | -0.27484100 | -0.26763700 |
| H  | 0.60688200  | -1.50360200 | -0.12876400 |
| H  | 0.69328200  | -0.10752500 | -1.33091500 |
| C  | 3.14425900  | -0.63833800 | -0.79123500 |
| H  | 3.02692000  | -1.72396100 | -0.84887400 |
| H  | 3.02041400  | -0.19217700 | -1.78167100 |
| H  | 4.11844700  | -0.38498700 | -0.38335300 |
| O  | 2.17904300  | -0.10460900 | 0.11054100  |
| F  | 0.25787500  | 1.82245900  | 0.55835300  |
| F  | 0.16138800  | 0.13113400  | 1.93048900  |
| C  | -1.50798300 | 0.32708800  | 0.30695000  |
| F  | -1.71399300 | 0.68468200  | -0.96349500 |
| F  | -2.25753300 | 1.08665300  | 1.09059300  |
| F  | -1.87179500 | -0.94015700 | 0.45275500  |
| Cl | 0.56540700  | -3.10109500 | -0.08547200 |

### PC7a

0 2

|   |             |             |             |
|---|-------------|-------------|-------------|
| C | -0.03144800 | 0.81162000  | 0.35138500  |
| C | 0.92565000  | 0.38291500  | -0.68503400 |
| H | 0.89492500  | -1.95624900 | 0.88322800  |



|    |             |             |             |
|----|-------------|-------------|-------------|
| H  | 0.75189100  | 0.56852100  | -1.73706400 |
| C  | 3.07397500  | -0.34607700 | -1.21299800 |
| H  | 2.71336000  | -1.26717000 | -1.67484000 |
| H  | 3.21388200  | 0.43362900  | -1.96564100 |
| H  | 4.00819700  | -0.53192100 | -0.69068200 |
| O  | 2.14110500  | 0.09200500  | -0.22720500 |
| F  | 0.24031400  | 2.04718600  | 0.85725900  |
| F  | -0.00314100 | -0.03758700 | 1.41866100  |
| C  | -1.47834600 | 0.84436600  | -0.16966000 |
| F  | -1.55619600 | 1.63640000  | -1.24196400 |
| F  | -2.30224300 | 1.30521900  | 0.75980400  |
| F  | -1.87145100 | -0.37686900 | -0.52151000 |
| Cl | 1.09592600  | -3.00250400 | 0.16277800  |

### P7a

0 2

|   |             |             |             |
|---|-------------|-------------|-------------|
| C | -0.03469700 | 0.79301300  | 0.35927300  |
| C | 0.90971100  | 0.31638500  | -0.67262300 |
| H | 0.76305900  | 0.57410300  | -1.71504800 |
| C | 3.07650900  | -0.33562500 | -1.21570200 |
| H | 2.74602100  | -1.22864000 | -1.75070600 |
| H | 3.21199300  | 0.49311100  | -1.91533800 |
| H | 4.00936300  | -0.53735900 | -0.69659600 |
| O | 2.12531600  | 0.01557100  | -0.21815300 |
| F | 0.26231600  | 2.05304200  | 0.80019800  |
| F | -0.02142400 | -0.00146200 | 1.45167100  |
| C | -1.48028700 | 0.84312600  | -0.16595900 |
| F | -1.54219400 | 1.60834300  | -1.26018100 |
| F | -2.29726900 | 1.34591400  | 0.74827400  |
| F | -1.90286700 | -0.37728500 | -0.48860000 |

### CR7b

0 2

|   |             |             |             |
|---|-------------|-------------|-------------|
| C | -0.49844700 | 0.55705700  | -0.28942100 |
| C | 0.29430800  | 1.15900600  | 0.86341900  |
| H | -0.41865700 | 1.65292900  | 1.52711700  |
| H | 0.78564900  | 0.34226000  | 1.40787900  |
| C | 2.46746000  | 1.61947100  | 0.02279200  |
| H | 2.90385000  | 1.00523600  | 0.81793300  |
| H | 2.40605500  | 1.03076900  | -0.89552700 |
| H | 3.09760500  | 2.49005100  | -0.14804300 |
| O | 1.19858900  | 2.11920000  | 0.41733200  |
| F | 0.31679400  | -0.14394800 | -1.12686600 |
| F | -1.08998900 | 1.51699600  | -1.02113800 |
| C | -1.59496500 | -0.41648700 | 0.17224000  |

|    |             |             |             |
|----|-------------|-------------|-------------|
| F  | -1.04908300 | -1.41832300 | 0.86389000  |
| F  | -2.25200400 | -0.92261000 | -0.86098800 |
| F  | -2.46255400 | 0.21529500  | 0.96336500  |
| Cl | 2.14459900  | -2.01269500 | -0.00156200 |

### TS7b

0 2

|    |             |             |             |
|----|-------------|-------------|-------------|
| C  | -0.52762000 | 0.53629100  | -0.18778700 |
| C  | 0.58808800  | 0.47502800  | 0.85983600  |
| H  | 0.15850800  | 0.33151900  | 1.85263900  |
| H  | 1.18377200  | -0.46448500 | 0.61464100  |
| C  | 2.08307100  | 1.89557200  | -0.30576300 |
| H  | 2.59275200  | 1.00622000  | -0.69254800 |
| H  | 1.39488300  | 2.28081500  | -1.06128100 |
| H  | 2.81095500  | 2.65940200  | -0.04499200 |
| O  | 1.39562300  | 1.57809300  | 0.89941700  |
| F  | -0.05385400 | 0.27894000  | -1.42731400 |
| F  | -1.08172500 | 1.76436800  | -0.20880400 |
| C  | -1.64745900 | -0.47989000 | 0.09268500  |
| F  | -1.12892800 | -1.70304500 | 0.18671800  |
| F  | -2.55216100 | -0.46700100 | -0.87386900 |
| F  | -2.24787900 | -0.18714300 | 1.24607800  |
| Cl | 2.42932900  | -1.77501700 | -0.05428800 |

### PC7b

0 2

|    |             |             |             |
|----|-------------|-------------|-------------|
| C  | -0.57286800 | 0.53441300  | -0.17861900 |
| C  | 0.30768100  | 0.79324000  | 0.97799000  |
| H  | -0.00277700 | 0.47997800  | 1.96365600  |
| H  | 1.41963200  | -1.71887500 | -0.41528000 |
| C  | 1.81435900  | 2.13656500  | -0.28208100 |
| H  | 2.33265100  | 1.29009100  | -0.73461200 |
| H  | 1.04565600  | 2.51631100  | -0.95699900 |
| H  | 2.51905000  | 2.92721900  | -0.04070100 |
| O  | 1.24089000  | 1.74079000  | 0.96779000  |
| F  | 0.11465600  | 0.10294500  | -1.28553900 |
| F  | -1.25884000 | 1.63849600  | -0.59733600 |
| C  | -1.60570800 | -0.56444600 | 0.12642800  |
| F  | -0.97344600 | -1.71978100 | 0.36190900  |
| F  | -2.42206000 | -0.73581700 | -0.90181300 |
| F  | -2.32672400 | -0.25577900 | 1.20063200  |
| Cl | 2.64091800  | -1.65236800 | -0.02478600 |

### P7b

0 2

|   |             |             |             |
|---|-------------|-------------|-------------|
| C | 0.10433100  | -0.21152000 | -0.05751100 |
| C | 0.95109000  | 0.99115500  | 0.08177400  |
| H | 0.51376500  | 1.97058000  | -0.04237600 |
| C | 2.96551000  | -0.27622600 | 0.14314300  |
| H | 2.84554500  | -0.58466700 | 1.18243000  |
| H | 2.59776400  | -1.05731400 | -0.52359000 |
| H | 4.00973600  | -0.06655200 | -0.07082400 |
| O | 2.27293100  | 0.95389200  | -0.08531700 |
| F | 0.36368200  | -1.15478300 | 0.89494100  |
| F | 0.28323400  | -0.85396000 | -1.25341600 |
| C | -1.39261500 | 0.12929500  | 0.04641800  |
| F | -1.66089000 | 0.68811800  | 1.22511800  |
| F | -2.12698000 | -0.96675000 | -0.08146300 |
| F | -1.73906400 | 0.98855200  | -0.91251800 |

### CR7c

0 2

|    |             |             |             |
|----|-------------|-------------|-------------|
| C  | -0.78390700 | 0.44928400  | 0.09288700  |
| C  | 0.55623300  | -0.25793700 | -0.08253300 |
| H  | 0.53782100  | -1.19160400 | 0.48109700  |
| H  | 0.69042600  | -0.47861100 | -1.14765500 |
| C  | 1.92701200  | 1.68964300  | -0.29169100 |
| H  | 1.17215400  | 2.45417500  | -0.09959000 |
| H  | 2.89525000  | 2.02261700  | 0.07438000  |
| H  | 1.98739200  | 1.48184900  | -1.36413000 |
| O  | 1.61988000  | 0.49740200  | 0.42883400  |
| F  | -0.94205600 | 1.42808900  | -0.83350000 |
| F  | -0.87538500 | 1.02163800  | 1.30686200  |
| C  | -1.97648500 | -0.50913700 | -0.06514200 |
| F  | -1.89864600 | -1.12972500 | -1.24421700 |
| F  | -3.12542400 | 0.14619900  | -0.00236400 |
| F  | -1.95479300 | -1.43034600 | 0.89609400  |
| Cl | 3.56397200  | -0.98949700 | -0.02363400 |

### TS7c

0 2

|   |             |             |             |
|---|-------------|-------------|-------------|
| C | 0.93574000  | -0.53102300 | 0.01292700  |
| C | -0.38516400 | -0.12636600 | 0.64852500  |
| H | -0.20850000 | 0.12972200  | 1.69274900  |
| H | -0.80397700 | 0.73773300  | 0.12400700  |
| C | -2.11224000 | -1.28995400 | -0.43913600 |
| H | -1.69674500 | -0.99540100 | -1.40357400 |

|    |             |             |             |
|----|-------------|-------------|-------------|
| H  | -2.70387100 | -2.19983600 | -0.41156200 |
| H  | -3.03296200 | -0.29422000 | -0.26463300 |
| O  | -1.27557700 | -1.22130000 | 0.62521800  |
| F  | 0.74002300  | -0.94345600 | -1.26120300 |
| F  | 1.49630100  | -1.55005800 | 0.68932000  |
| C  | 1.95300800  | 0.62169100  | -0.02672300 |
| F  | 1.46463600  | 1.63143500  | -0.74589900 |
| F  | 3.09595500  | 0.22613900  | -0.56338100 |
| F  | 2.18430200  | 1.05890300  | 1.21104600  |
| Cl | -3.79578500 | 0.97292000  | 0.00698600  |

### PC7c

0 2

|    |             |             |             |
|----|-------------|-------------|-------------|
| C  | -0.95430800 | 0.52424600  | 0.11495500  |
| C  | 0.47738200  | 0.09582800  | 0.39609800  |
| H  | 0.50239100  | -0.46439600 | 1.33077200  |
| H  | 0.83508700  | -0.54079200 | -0.41853200 |
| C  | 1.91731500  | 1.69669500  | -0.54896100 |
| H  | 1.52046700  | 1.42218800  | -1.51961500 |
| H  | 2.40790100  | 2.64601600  | -0.39162500 |
| H  | 3.46557700  | 0.15769300  | -0.28851800 |
| O  | 1.28577200  | 1.23609200  | 0.55747700  |
| F  | -1.00949700 | 1.27876300  | -1.00648900 |
| F  | -1.43995500 | 1.26351100  | 1.12953800  |
| C  | -1.90321800 | -0.66864500 | -0.08715300 |
| F  | -1.49827100 | -1.39947500 | -1.12655400 |
| F  | -3.14197400 | -0.25883700 | -0.31059000 |
| F  | -1.89403600 | -1.44213000 | 0.99861200  |
| Cl | 3.80076300  | -1.05733400 | 0.02455400  |

### P7c

0 2

|   |             |             |             |
|---|-------------|-------------|-------------|
| C | 0.06736300  | 0.33923600  | 0.01836600  |
| C | 1.05313000  | -0.65951200 | 0.60703400  |
| H | 0.75851400  | -0.86249400 | 1.63724400  |
| H | 1.01577500  | -1.58608600 | 0.02559300  |
| C | 3.11761000  | -0.35819700 | -0.46683900 |
| H | 2.62449100  | -0.58290500 | -1.40404600 |
| H | 4.06611000  | 0.15443800  | -0.43404300 |
| O | 2.34274900  | -0.11290500 | 0.62647300  |
| F | 0.41503000  | 0.66641200  | -1.24691100 |
| F | 0.04753200  | 1.47387800  | 0.74322400  |
| C | -1.37066900 | -0.20319700 | -0.03008100 |
| F | -1.41774500 | -1.30032600 | -0.78807700 |

|   |             |             |             |
|---|-------------|-------------|-------------|
| F | -2.20442000 | 0.69537900  | -0.53026700 |
| F | -1.77500500 | -0.52753100 | 1.19898500  |

### CR8a

0 2

|    |             |             |             |
|----|-------------|-------------|-------------|
| C  | 0.61616900  | -0.10691300 | -0.43053000 |
| C  | -0.41214000 | -0.75172100 | 0.47912400  |
| H  | -0.02793700 | -1.73396500 | 0.77775500  |
| H  | -0.55621700 | -0.12770000 | 1.36939000  |
| C  | -2.51174500 | -1.79521200 | 0.33560700  |
| H  | -2.75686000 | -1.49566300 | 1.35941500  |
| H  | -3.41232100 | -1.77406300 | -0.27335400 |
| H  | -2.08169400 | -2.80142100 | 0.33197300  |
| O  | -1.60145300 | -0.87686900 | -0.25230100 |
| F  | 0.17477700  | 1.06906100  | -0.91000100 |
| F  | 0.88594900  | -0.91084800 | -1.48044000 |
| C  | 1.94822900  | 0.16035300  | 0.29194300  |
| F  | 2.83951200  | 0.68521300  | -0.53383100 |
| F  | 2.43708100  | -0.98261100 | 0.78059500  |
| F  | 1.75834400  | 0.99985600  | 1.30966100  |
| Cl | -2.88573000 | 1.30368700  | 0.11191200  |

### TS8a

0 2

|    |             |             |             |
|----|-------------|-------------|-------------|
| C  | 0.62047400  | -0.64138800 | -0.30425100 |
| C  | -0.73936900 | -0.53666600 | 0.35982400  |
| H  | -0.68848200 | -0.52363800 | 1.45480700  |
| H  | -1.18598400 | 0.62392500  | 0.09977500  |
| C  | -2.83173000 | -1.55652100 | 0.49680700  |
| H  | -3.37431800 | -0.61006200 | 0.42283300  |
| H  | -3.37859500 | -2.34605800 | -0.01030400 |
| H  | -2.67261700 | -1.81924700 | 1.54611100  |
| O  | -1.58027400 | -1.43860700 | -0.17377300 |
| F  | 0.51727900  | -0.46656900 | -1.63020200 |
| F  | 1.13869500  | -1.86911100 | -0.08113800 |
| C  | 1.63368100  | 0.38258900  | 0.23893800  |
| F  | 2.81950500  | 0.20099400  | -0.32102000 |
| F  | 1.75431400  | 0.23119000  | 1.56063100  |
| F  | 1.22094300  | 1.61897200  | -0.00798500 |
| Cl | -2.07134000 | 1.93274000  | -0.15020700 |

### PC8a

0 2

|    |             |             |             |
|----|-------------|-------------|-------------|
| C  | 0.70371800  | -0.39865700 | -0.44424700 |
| C  | -0.34924500 | -0.95070900 | 0.42816200  |
| H  | -0.15443400 | -1.22837100 | 1.45605500  |
| H  | -1.82306600 | 1.11632200  | -0.76676300 |
| C  | -2.45471200 | -1.93210600 | 0.60570600  |
| H  | -2.83857500 | -1.13932500 | 1.25055300  |
| H  | -3.23634600 | -2.27832900 | -0.06457100 |
| H  | -2.07580800 | -2.76533500 | 1.20248300  |
| O  | -1.41450700 | -1.41427600 | -0.22140200 |
| F  | 0.17310800  | 0.46585000  | -1.35665900 |
| F  | 1.35189600  | -1.34989800 | -1.17264500 |
| C  | 1.77366700  | 0.37117700  | 0.34831100  |
| F  | 2.73854900  | 0.79470800  | -0.45449400 |
| F  | 2.30821100  | -0.42413400 | 1.27823900  |
| F  | 1.23194600  | 1.42253300  | 0.95759300  |
| Cl | -2.75468600 | 1.58173400  | -0.01190700 |

### P8a

0 2

|   |             |             |             |
|---|-------------|-------------|-------------|
| C | 0.06768300  | 0.46899600  | -0.03101800 |
| C | -1.12756300 | -0.39932600 | -0.06593000 |
| H | -1.10488300 | -1.34800500 | -0.58941800 |
| C | -3.44812800 | -0.56662000 | -0.01728700 |
| H | -3.44242100 | -1.37133600 | 0.72116400  |
| H | -4.29795800 | 0.08841800  | 0.15333100  |
| H | -3.49628600 | -0.98306500 | -1.02670300 |
| O | -2.28259000 | 0.23596500  | 0.12656100  |
| F | 0.05280500  | 1.29417100  | 1.03847400  |
| F | 0.16337100  | 1.27391400  | -1.13236900 |
| C | 1.36959100  | -0.34935200 | 0.02704600  |
| F | 2.42881200  | 0.44556200  | -0.01989500 |
| F | 1.42441500  | -1.19413100 | -1.00738400 |
| F | 1.42312600  | -1.06350800 | 1.14920400  |

### CR8c

0 2

|   |             |             |             |
|---|-------------|-------------|-------------|
| C | 0.38319100  | 0.45829200  | -0.87109500 |
| C | 0.19500400  | -0.62936600 | 0.16727500  |
| H | 1.14236000  | -0.78329800 | 0.69537200  |
| H | -0.58272100 | -0.33103700 | 0.87955600  |
| C | -0.19824200 | -2.92162700 | 0.23061600  |
| H | 0.69578000  | -3.06135500 | 0.84662700  |
| H | -1.09183400 | -2.83068800 | 1.07382300  |
| H | -0.47245300 | -3.77988700 | -0.37756100 |
| O | -0.19620800 | -1.79036100 | -0.52544100 |

|    |             |             |             |
|----|-------------|-------------|-------------|
| F  | -0.75276900 | 0.66529200  | -1.56101200 |
| F  | 1.34791700  | 0.11219200  | -1.74761400 |
| C  | 0.79536200  | 1.80020600  | -0.24030900 |
| F  | 0.97389600  | 2.72345800  | -1.17086400 |
| F  | 1.93354500  | 1.64883200  | 0.44029200  |
| F  | -0.14613600 | 2.21484800  | 0.60545400  |
| Cl | -2.14783900 | -2.38039700 | 2.25503900  |

### TS8c

0 2

|    |             |             |             |
|----|-------------|-------------|-------------|
| C  | -0.73342200 | 1.22952000  | -1.10097000 |
| C  | -0.94707200 | 0.15704100  | -0.05159500 |
| H  | -0.00531300 | -0.01134500 | 0.48086600  |
| H  | -1.72337100 | 0.47332000  | 0.65288400  |
| C  | -1.30174900 | -2.14390600 | -0.01341000 |
| H  | -0.42071000 | -2.26273600 | 0.62226300  |
| H  | -2.27790300 | -2.04932500 | 0.95294800  |
| H  | -1.60623000 | -3.00302300 | -0.60307100 |
| O  | -1.35819000 | -1.00540900 | -0.73638400 |
| F  | -1.85969400 | 1.44488000  | -1.80349700 |
| F  | 0.23367900  | 0.85720900  | -1.96400100 |
| C  | -0.30622800 | 2.57198900  | -0.48143200 |
| F  | -0.10211000 | 3.48065500  | -1.42067700 |
| F  | 0.82149700  | 2.40923800  | 0.21373600  |
| F  | -1.25024800 | 3.01140500  | 0.34859000  |
| Cl | -3.24585800 | -1.67329800 | 2.03206100  |

### PC8c

0 2

|   |             |             |             |
|---|-------------|-------------|-------------|
| C | -0.79976400 | 0.39956800  | -0.37998300 |
| C | 0.33869100  | 0.70140500  | 0.57316400  |
| H | -0.05830300 | 1.22682400  | 1.44815200  |
| H | 0.80727400  | -0.24026400 | 0.87700100  |
| C | 2.35835600  | 1.85816600  | 0.55807100  |
| H | 2.31316300  | 1.84705300  | 1.64254900  |
| H | 3.30702300  | -0.08169700 | 0.06884400  |
| H | 2.98738800  | 2.56063000  | 0.03111800  |
| O | 1.24964200  | 1.51296300  | -0.12920600 |
| F | -0.34883700 | -0.23107500 | -1.47903200 |
| F | -1.40935800 | 1.53734700  | -0.77021800 |
| C | -1.87272000 | -0.49794700 | 0.26150000  |
| F | -2.85846500 | -0.73668900 | -0.58838300 |
| F | -2.37432900 | 0.09877800  | 1.34532600  |

|    |             |             |             |
|----|-------------|-------------|-------------|
| F  | -1.33474100 | -1.65810300 | 0.63559300  |
| Cl | 3.26061900  | -1.36916000 | -0.08235800 |

**P8c**

0 2

|   |             |             |             |
|---|-------------|-------------|-------------|
| C | -0.01376700 | 0.42062600  | 0.01672100  |
| C | 1.14079300  | -0.55536600 | -0.08421000 |
| H | 1.09026200  | -1.24631300 | 0.76526800  |
| H | 1.05351200  | -1.11574300 | -1.02096300 |
| C | 3.45862900  | -0.53961900 | -0.03299900 |
| H | 3.41549500  | -1.52262100 | 0.42398300  |
| H | 4.35640900  | 0.05761900  | -0.00415100 |
| O | 2.32166100  | 0.19885800  | -0.05553500 |
| F | 0.00454000  | 1.29486700  | -1.00786000 |
| F | 0.05072100  | 1.12263800  | 1.16550700  |
| C | -1.38031700 | -0.28657500 | -0.00946100 |
| F | -2.36895300 | 0.58866700  | 0.08113300  |
| F | -1.47064800 | -1.14300500 | 1.00989800  |
| F | -1.51799100 | -0.97407800 | -1.14425200 |



**Cartesian Coordinates of all the species involved in the reaction of product radical (P1a)**

**AIM1a**

0 1

|    |             |             |             |
|----|-------------|-------------|-------------|
| C  | 0.36596500  | -0.62732200 | -0.08154000 |
| C  | -0.93090700 | 0.06659600  | 0.33773200  |
| H  | -0.90374000 | 0.24150600  | 1.41743100  |
| C  | -2.04931600 | 2.10766900  | 0.07486600  |
| H  | -3.04012300 | 1.66472000  | -0.04548100 |
| H  | -1.87651700 | 2.35945300  | 1.12591800  |
| H  | -1.96556800 | 3.00158400  | -0.53713000 |
| O  | -1.04689300 | 1.21159200  | -0.38823200 |
| F  | 0.31799300  | -1.05223100 | -1.35009200 |
| F  | 0.56806300  | -1.68884900 | 0.72213800  |
| C  | 1.60408500  | 0.29030000  | 0.06097300  |
| F  | 2.71177300  | -0.44153200 | 0.02677200  |
| F  | 1.55510100  | 0.92521700  | 1.23721600  |
| F  | 1.66499000  | 1.18877600  | -0.90764800 |
| Cl | -2.30230300 | -1.08034500 | 0.07279200  |

**AIM2a**

0 2

|   |             |             |             |
|---|-------------|-------------|-------------|
| C | 0.42613000  | -0.61597000 | -0.19136000 |
| C | -0.93285800 | -0.03557000 | 0.20018600  |
| H | -1.03886500 | -0.00326600 | 1.29067400  |
| C | -2.24883800 | 1.88759800  | -0.01012600 |
| H | -3.15044500 | 1.37162000  | -0.34609000 |
| H | -2.27015400 | 2.00054300  | 1.07768400  |
| H | -2.18136700 | 2.86240700  | -0.48522000 |
| O | -1.08154600 | 1.17081000  | -0.40851000 |
| F | 0.47929600  | -0.88139300 | -1.50338400 |
| F | 0.60074400  | -1.76600100 | 0.48770500  |
| C | 1.60794300  | 0.31429400  | 0.16142800  |
| F | 2.74589200  | -0.36680200 | 0.11186800  |
| F | 1.44606600  | 0.78071800  | 1.40370800  |
| F | 1.69001800  | 1.33648600  | -0.67337500 |
| O | -1.91303200 | -0.98756100 | -0.27557900 |
| O | -2.89686800 | -1.11581200 | 0.56702500  |

### AIM3a

0 1

|   |             |             |             |
|---|-------------|-------------|-------------|
| C | -0.95622900 | -0.48827600 | 0.41007200  |
| C | 0.15743100  | 0.49525500  | 0.03217500  |
| H | 0.50527200  | 0.28008200  | -0.98674000 |
| C | 0.54977200  | 2.79268600  | -0.24515100 |
| H | 1.40011800  | 2.86695500  | 0.43522500  |
| H | 0.90642100  | 2.60232100  | -1.26244700 |
| H | -0.02577700 | 3.71407200  | -0.22116200 |
| O | -0.33634900 | 1.75830000  | 0.17158200  |
| F | -1.22521300 | -0.42777200 | 1.72221100  |
| F | -0.55031500 | -1.73377100 | 0.11081500  |
| C | -2.27128000 | -0.23535500 | -0.36328100 |
| F | -3.06068600 | -1.29771800 | -0.25862000 |
| F | -1.99166400 | -0.04187100 | -1.65643700 |
| F | -2.92147800 | 0.81852000  | 0.09925700  |
| O | 1.22434100  | 0.20921500  | 0.93749700  |
| O | 2.42920200  | 0.54579100  | 0.34330300  |
| N | 3.04584800  | -0.65182200 | -0.24128700 |
| O | 2.39685200  | -1.63707000 | -0.24712100 |
| O | 4.13083800  | -0.39411500 | -0.63448400 |

### AIM4a

0 2

|   |             |             |             |
|---|-------------|-------------|-------------|
| C | 0.33197900  | 0.69091600  | 0.07956000  |
| C | -1.13141800 | 0.42441500  | -0.33328300 |
| H | -1.12853600 | 0.27836600  | -1.43758800 |
| C | -2.83567600 | -1.16148100 | -0.05206400 |
| H | -3.59325800 | -0.40214000 | 0.14985400  |
| H | -2.84092200 | -1.41783900 | -1.11728300 |
| H | -3.03939600 | -2.05171300 | 0.53715600  |
| O | -1.54801300 | -0.70565300 | 0.33905200  |
| F | 0.39276800  | 1.12401200  | 1.34794100  |
| F | 0.82713900  | 1.64946900  | -0.72265600 |
| C | 1.24983000  | -0.54456600 | -0.05476400 |
| F | 2.52227300  | -0.16136100 | -0.02748100 |
| F | 1.01562000  | -1.14136200 | -1.22790900 |
| F | 1.05387500  | -1.41516100 | 0.91974200  |
| O | -1.87589400 | 1.53530800  | -0.16099800 |

### AIM4a-TS1

0 2

|   |             |             |             |
|---|-------------|-------------|-------------|
| C | 0.32179500  | 0.71147300  | 0.20191200  |
| C | -1.29852500 | 0.44920200  | -0.76381800 |
| H | -0.79842400 | 0.57418700  | -1.73879700 |
| C | -2.45866400 | -1.15850600 | 0.50646700  |
| H | -2.07097600 | -0.75464900 | 1.44457500  |
| H | -3.44054800 | -0.72672000 | 0.31142500  |
| H | -2.51772700 | -2.24210100 | 0.55833000  |
| O | -1.56555600 | -0.87087800 | -0.57005700 |
| F | 0.04845900  | 0.79524200  | 1.48906600  |
| F | 0.82494300  | 1.84261100  | -0.25017000 |
| C | 1.27215800  | -0.46450800 | -0.07645100 |
| F | 2.50421600  | -0.14262000 | 0.31918000  |
| F | 1.30642600  | -0.72660300 | -1.37800700 |
| F | 0.88896400  | -1.54368500 | 0.58571900  |
| O | -1.97819200 | 1.35823000  | -0.26447900 |

### AIM4a-PC1

0 2

|   |             |             |             |
|---|-------------|-------------|-------------|
| C | 0.68953700  | 0.79272100  | 0.34240000  |
| C | -2.14870300 | 0.31306100  | -0.85940300 |
| H | -1.97963500 | 0.31047700  | -1.94322900 |
| C | -2.11464400 | -1.04403900 | 1.04655300  |
| H | -1.50392600 | -0.33040600 | 1.60147800  |
| H | -3.16456100 | -0.87104300 | 1.28299400  |
| H | -1.82511300 | -2.06304700 | 1.28530900  |
| O | -1.89911500 | -0.89900200 | -0.36201200 |
| F | 0.93769400  | 0.97351400  | 1.62077900  |
| F | 0.93769500  | 1.86747600  | -0.36779300 |
| C | 1.30457200  | -0.46974900 | -0.22394900 |
| F | 2.64004000  | -0.42172600 | -0.18286800 |
| F | 0.93439800  | -0.62131800 | -1.48996900 |
| F | 0.90747700  | -1.52142600 | 0.48437500  |
| O | -2.49176700 | 1.26317600  | -0.21809600 |

### AIM5a

0 2

|   |             |             |             |
|---|-------------|-------------|-------------|
| C | 0.86559000  | 0.00004700  | -0.37381900 |
| F | 1.49803000  | 1.08935200  | -0.00061400 |
| F | 1.49785600  | -1.08935700 | -0.00050700 |
| C | -0.60689900 | 0.00006400  | -0.02069600 |
| F | -0.78845200 | -0.00048600 | 1.30343600  |
| F | -1.18991500 | -1.08315200 | -0.52010400 |
| F | -1.18997900 | 1.08356900  | -0.51920100 |

### AIM6a

0 1

|   |             |             |             |
|---|-------------|-------------|-------------|
| C | 0.82724000  | 0.43210700  | -0.00002200 |
| H | 1.41679800  | 1.35690500  | 0.00000200  |
| C | -1.35590700 | -0.39797500 | -0.00003000 |
| H | -1.18861400 | -1.00745000 | -0.88813400 |
| H | -1.18866400 | -1.00750700 | 0.88807500  |
| H | -2.36040500 | 0.01505800  | 0.00012900  |
| O | -0.47223700 | 0.72796900  | 0.00001200  |
| O | 1.28384800  | -0.67319300 | 0.00001800  |

### AIM4a-TS2

0 2

|   |             |             |             |
|---|-------------|-------------|-------------|
| C | -0.34068300 | 0.68751000  | -0.12536800 |
| C | 1.16719700  | 0.46354600  | 0.16647600  |
| H | 0.91601100  | 0.27956700  | 1.79913000  |
| C | 2.92396800  | -1.05508400 | -0.07428100 |
| H | 3.46342800  | -0.41099800 | -0.76770200 |
| H | 3.28048600  | -0.87682800 | 0.94213600  |
| H | 3.03599200  | -2.10081300 | -0.34316400 |
| O | 1.51930400  | -0.78670200 | -0.14554500 |
| F | -0.45644700 | 1.07207800  | -1.41045800 |
| F | -0.79054300 | 1.67721800  | 0.65569700  |
| C | -1.26606100 | -0.53323700 | 0.07632000  |
| F | -2.53258400 | -0.14085000 | -0.01431000 |
| F | -1.07498800 | -1.06196700 | 1.28532200  |
| F | -1.04859700 | -1.46239100 | -0.84145800 |
| O | 1.92144500  | 1.40868600  | 0.27524200  |

### AIM4a-PC2

0 2

|   |             |             |             |
|---|-------------|-------------|-------------|
| C | -0.34071200 | 0.65346100  | -0.26845500 |
| C | 1.10300300  | 0.42735800  | 0.23183400  |
| H | 1.03096000  | -1.98960700 | 1.53964100  |
| C | 3.11423700  | -0.65525200 | -0.21958200 |
| H | 3.69463800  | 0.26580000  | -0.17639900 |
| H | 3.12568100  | -1.14059400 | 0.75696200  |
| H | 3.49224100  | -1.31998300 | -0.98972500 |
| O | 1.76142700  | -0.35933000 | -0.59829300 |
| F | -0.37061100 | 0.77402300  | -1.60606300 |
| F | -0.82100800 | 1.77545600  | 0.27906500  |
| C | -1.28770400 | -0.49944200 | 0.12118500  |
| F | -2.51837800 | -0.23826500 | -0.29719300 |
| F | -1.30356500 | -0.64431700 | 1.44296700  |
| F | -0.88045700 | -1.63926600 | -0.42927600 |
| O | 1.50978500  | 0.90669900  | 1.24505800  |

### AIM7a

0 1

|   |             |             |             |
|---|-------------|-------------|-------------|
| C | 0.34048700  | 0.63314300  | 0.30403600  |
| C | -1.12968500 | 0.48083800  | -0.14540800 |
| C | -3.03013500 | -0.85432700 | 0.06009100  |
| H | -3.65232400 | -0.02155600 | 0.38581200  |
| H | -3.12312700 | -0.98218300 | -1.01783100 |
| H | -3.29450600 | -1.76653100 | 0.58534200  |
| O | -1.65859700 | -0.59858900 | 0.40209000  |
| F | 0.41223300  | 0.66823000  | 1.64760300  |
| F | 0.82666600  | 1.77685400  | -0.18489000 |
| C | 1.24705800  | -0.51331300 | -0.19255000 |
| F | 2.52102300  | -0.20923600 | 0.01615800  |
| F | 1.05514300  | -0.68967200 | -1.50019600 |
| F | 0.97194800  | -1.64744200 | 0.43615700  |
| O | -1.66384200 | 1.24904200  | -0.88256900 |

### AIM4a-TS3

0 2

|   |             |             |             |
|---|-------------|-------------|-------------|
| C | -0.08150800 | -0.67084900 | -0.01546600 |
| C | 1.04533800  | -0.54839700 | -1.06433200 |
| H | 0.66574000  | -0.31196100 | -2.06671900 |

|   |             |             |             |
|---|-------------|-------------|-------------|
| C | 2.50973800  | 1.26043500  | 0.36747900  |
| H | 2.16676100  | 0.68743800  | 1.22984300  |
| H | 3.55362300  | 1.05033800  | 0.13296300  |
| H | 2.40683600  | 2.33270800  | 0.58364800  |
| O | 1.68852800  | 1.08391900  | -0.75619400 |
| F | 0.41280000  | -0.98623200 | 1.18994000  |
| F | -0.87432000 | -1.68423200 | -0.43278500 |
| C | -0.98623000 | 0.56829500  | 0.14681500  |
| F | -2.13025200 | 0.22939700  | 0.72898500  |
| F | -1.25749800 | 1.08793100  | -1.05058100 |
| F | -0.40255500 | 1.49873100  | 0.89763800  |
| O | 2.09037200  | -1.18344200 | -0.88984800 |

### AIM4a-PC3

0 2

|   |             |             |             |
|---|-------------|-------------|-------------|
| C | -0.86468400 | 0.68047400  | 0.04528400  |
| C | 0.42996000  | 1.35915400  | 0.54645500  |
| H | 0.62595400  | 1.22763100  | 1.62104200  |
| C | 3.05158100  | -0.38283100 | -0.36778900 |
| H | 2.54912700  | 0.16327000  | -1.17419400 |
| H | 3.82555800  | 0.28824400  | 0.04686700  |
| H | 3.56557100  | -1.27993400 | -0.72916400 |
| O | 2.22009600  | -0.65931300 | 0.68613000  |
| F | -1.20793500 | 1.16286800  | -1.15292800 |
| F | -1.84346000 | 0.96882400  | 0.93349800  |
| C | -0.78600100 | -0.85151300 | -0.06491100 |
| F | -1.95497000 | -1.34315100 | -0.45715500 |
| F | -0.47509000 | -1.37872100 | 1.11366800  |
| F | 0.13906300  | -1.19830800 | -0.95833300 |
| O | 1.09617500  | 2.01749600  | -0.18957300 |

### AIM8a

0 1

|   |             |             |             |
|---|-------------|-------------|-------------|
| C | -0.41346000 | 0.49084800  | 0.00836000  |
| C | -1.56754200 | -0.34111300 | -0.58929600 |
| H | -1.58510900 | -0.36774900 | -1.69238400 |
| F | -0.68817200 | 0.85332200  | 1.26314100  |
| F | -0.25292400 | 1.59666200  | -0.75027400 |
| C | 0.91902500  | -0.27683800 | 0.00207500  |
| F | 1.90935800  | 0.48560600  | 0.43707100  |
| F | 1.19050400  | -0.66947800 | -1.24485200 |
| F | 0.82499600  | -1.35281900 | 0.77388600  |

|   |             |             |            |
|---|-------------|-------------|------------|
| O | -2.36211200 | -0.88615800 | 0.10685000 |
|---|-------------|-------------|------------|

**AIM9a**

0 2

|   |            |            |             |
|---|------------|------------|-------------|
| C | 2.51975100 | 1.40754700 | 0.43603900  |
| H | 2.41866900 | 0.47333800 | 1.00133100  |
| H | 3.53856300 | 1.41734000 | 0.00889000  |
| H | 2.43917900 | 2.28640600 | 1.08667000  |
| O | 1.67876600 | 1.46921800 | -0.64127900 |

**O2**

0 3

|   |            |            |             |
|---|------------|------------|-------------|
| O | 0.00000000 | 0.00000000 | 0.59443000  |
| O | 0.00000000 | 0.00000000 | -0.59443000 |

**NO**

0 2

|   |            |            |             |
|---|------------|------------|-------------|
| N | 1.43854100 | 2.05140700 | -0.06351700 |
| O | 0.30016900 | 2.05140700 | -0.06351700 |

**NO2**

0 2

|   |            |            |            |
|---|------------|------------|------------|
| O | 0.25132700 | 2.45133500 | 1.30347100 |
| N | 1.24821800 | 3.06640400 | 1.45614100 |
| O | 1.51783700 | 4.21505800 | 1.51097800 |

**Cartesian Coordinates of all the species involved in the reaction of product radical AIM5a**

**SIM1**

0 2

|   |             |             |             |
|---|-------------|-------------|-------------|
| C | -0.09832000 | 0.53038200  | 0.00000000  |
| F | 0.24847500  | 1.21556700  | 1.07994100  |
| F | 0.24847500  | 1.21556700  | -1.07994100 |
| C | 0.59600400  | -0.84810400 | 0.00000000  |
| F | 1.90882700  | -0.66960700 | 0.00000000  |
| F | 0.24847500  | -1.53013200 | -1.08095800 |
| F | 0.24847500  | -1.53013200 | 1.08095800  |
| O | -1.48474500 | 0.28723700  | 0.00000000  |
| O | -2.15408600 | 1.41213200  | 0.00000000  |

**SIM2**

0 1

|   |             |             |             |
|---|-------------|-------------|-------------|
| C | 0.48795800  | -0.48599800 | -0.15534800 |
| F | -0.01785300 | -0.17795000 | -1.35037200 |
| F | 0.74607400  | -1.79176000 | -0.14228900 |
| C | 1.79228700  | 0.30911200  | 0.07921300  |
| F | 2.66842900  | -0.02392600 | -0.85808600 |
| F | 2.29552000  | 0.01752500  | 1.26927600  |
| F | 1.55090600  | 1.60833300  | 0.00863200  |
| O | -0.37566400 | -0.13396900 | 0.86330600  |
| O | -1.60692200 | -0.72672700 | 0.62228800  |
| N | -2.52540900 | 0.28679400  | 0.04355200  |
| O | -2.08730400 | 1.36528100  | -0.12272500 |
| O | -3.57902200 | -0.20911500 | -0.13693100 |

**SIM3**

0 2

|   |             |             |             |
|---|-------------|-------------|-------------|
| C | -0.81051800 | 0.00000000  | 0.08548600  |
| F | -1.27403100 | 1.08100600  | -0.55933000 |
| F | -1.27403100 | -1.08100700 | -0.55933000 |
| C | 0.75407800  | 0.00000000  | -0.01478800 |
| F | 1.08821700  | 0.00000000  | -1.29404000 |
| F | 1.24752400  | -1.08073600 | 0.56786100  |
| F | 1.24752400  | 1.08073600  | 0.56786000  |
| O | -1.12227400 | 0.00000000  | 1.38357700  |



### **SIM3-TS1**

0 2

|   |             |             |             |
|---|-------------|-------------|-------------|
| C | -0.69181500 | -0.33802400 | 0.25770200  |
| F | -1.47798900 | 1.09632300  | -0.61048800 |
| F | -1.04124200 | -1.33869200 | -0.51619800 |
| C | 0.78124900  | 0.05554800  | 0.01069900  |
| F | 1.02979000  | 0.17222400  | -1.28250800 |
| F | 1.54968800  | -0.91327900 | 0.50903200  |
| F | 1.05993400  | 1.18748900  | 0.62412600  |
| O | -1.32727800 | -0.01771700 | 1.23423900  |

### **SIM4**

0 1

|   |             |             |             |
|---|-------------|-------------|-------------|
| C | 0.94607500  | 0.15640100  | -0.00002000 |
| F | 1.49716900  | -1.05001500 | -0.00003500 |
| C | -0.58823500 | 0.01759400  | -0.00009900 |
| F | -0.98047900 | -0.65239700 | 1.08020300  |
| F | -0.98040300 | -0.65255200 | -1.08002300 |
| F | -1.15381600 | 1.20973500  | -0.00014300 |
| O | 1.55134000  | 1.15788700  | 0.00008600  |

### **SIM3-TS2**

0 2

|   |             |             |             |
|---|-------------|-------------|-------------|
| C | 0.11525300  | 1.04502300  | 0.00000000  |
| F | -0.62646700 | 1.32563700  | -1.07329500 |
| F | -0.62646700 | 1.32563700  | 1.07329500  |
| C | 0.03339100  | -0.88086000 | 0.00000000  |
| F | -0.62646700 | -1.20538900 | -1.07980600 |
| F | -0.62646700 | -1.20538900 | 1.07980600  |
| F | 1.22869900  | -1.39678900 | 0.00000000  |
| O | 1.32533200  | 1.17770800  | 0.00000000  |

### **SIM5**

0 2

|   |             |             |             |
|---|-------------|-------------|-------------|
| C | 0.27553600  | 0.17610100  | 0.00000000  |
| F | 0.27553600  | -0.56645200 | 1.08379200  |
| F | 0.27553600  | -0.56645200 | -1.08379200 |
| F | -0.73476200 | 1.01550400  | 0.00000000  |

## CF<sub>2</sub>O

0 1

|   |             |             |             |
|---|-------------|-------------|-------------|
| C | -0.00044400 | 0.14284200  | 0.00000000  |
| F | -0.00044400 | -0.62935500 | 1.05882100  |
| F | -0.00044400 | -0.62935500 | -1.05882100 |
| O | 0.00133200  | 1.30891800  | 0.00000000  |

**Cartesian Coordinates of all the species involved in the reaction of product radical (P1b)**

**AIM1b**

0 1

|    |             |             |             |
|----|-------------|-------------|-------------|
| C  | -0.73519000 | 0.74572300  | 0.01586200  |
| C  | 0.42450600  | 0.56455300  | 0.98431400  |
| H  | 1.12034100  | 1.39400100  | 0.82118000  |
| H  | 0.02388000  | 0.61928700  | 1.99552600  |
| C  | 1.87747600  | -0.87565600 | -0.22873600 |
| H  | 2.21809000  | -1.90469800 | -0.19196300 |
| H  | 1.39325200  | -0.64272900 | -1.17505800 |
| O  | 1.05512000  | -0.68587800 | 0.86907300  |
| F  | -0.29595500 | 0.98335800  | -1.24418400 |
| F  | -1.45014500 | 1.82134200  | 0.40739600  |
| C  | -1.70020600 | -0.45263500 | -0.06683200 |
| F  | -2.80392000 | -0.11582800 | -0.72263600 |
| F  | -2.03666300 | -0.84873300 | 1.15875500  |
| F  | -1.12802600 | -1.47074700 | -0.70636200 |
| Cl | 3.35507900  | 0.16498300  | -0.15686100 |

**AIM2b**

0 2

|   |             |             |             |
|---|-------------|-------------|-------------|
| C | -0.79610700 | 0.74895200  | -0.00032200 |
| C | 0.48141100  | 0.64543300  | 0.81844400  |
| H | 1.08732300  | 1.53040100  | 0.60028500  |
| H | 0.20521700  | 0.64951100  | 1.87203100  |
| C | 1.97343400  | -0.58676400 | -0.55063200 |
| H | 2.36057200  | -1.59860400 | -0.64235000 |
| H | 1.46208400  | -0.24278000 | -1.45121100 |
| O | 1.17791400  | -0.55582400 | 0.58313700  |
| F | -0.52593000 | 1.02144400  | -1.30114200 |
| F | -1.53248100 | 1.76948500  | 0.48560000  |
| C | -1.67619700 | -0.51656600 | 0.01555600  |
| F | -2.87762900 | -0.24966900 | -0.48233600 |
| F | -1.81985700 | -0.95153800 | 1.26562500  |
| F | -1.12459100 | -1.48084400 | -0.71626400 |
| O | 3.08643200  | 0.31755500  | -0.41719400 |
| O | 3.97489900  | -0.14482500 | 0.41650900  |

**AIM3b**

0 1

|   |             |             |             |
|---|-------------|-------------|-------------|
| C | -1.60510900 | -0.18091400 | -0.66353400 |
|---|-------------|-------------|-------------|

|   |             |             |             |
|---|-------------|-------------|-------------|
| C | -0.13997400 | 0.21556000  | -0.65357100 |
| H | 0.34137200  | -0.25365100 | -1.51641700 |
| H | -0.06522000 | 1.29732900  | -0.75962800 |
| C | 1.07490700  | -1.39912200 | 0.57724900  |
| H | 1.29801000  | -1.63045400 | 1.61713300  |
| H | 0.47229400  | -2.17599400 | 0.10109600  |
| O | 0.47404600  | -0.14828300 | 0.56283300  |
| F | -1.73507700 | -1.52995400 | -0.61385800 |
| F | -2.15465500 | 0.24670200  | -1.81908900 |
| C | -2.45135900 | 0.39314800  | 0.48977500  |
| F | -3.74322600 | 0.19183200  | 0.25540500  |
| F | -2.23779700 | 1.70516700  | 0.59158500  |
| F | -2.13984800 | -0.18231000 | 1.64470000  |
| O | 2.27318900  | -1.41864500 | -0.18772900 |
| O | 3.21768900  | -0.65071900 | 0.48340500  |
| N | 3.30934400  | 0.66899700  | -0.10658700 |
| O | 2.64388800  | 0.89306800  | -1.06077800 |
| O | 4.09278300  | 1.32768300  | 0.48673500  |

#### AIM4b

0 2

|   |             |             |             |
|---|-------------|-------------|-------------|
| C | -0.38399500 | 0.74407500  | 0.01752300  |
| C | 0.77923800  | 0.60902200  | 0.98813200  |
| H | 1.43499000  | 1.47138400  | 0.83088000  |
| H | 0.37609200  | 0.64197700  | 1.99980400  |
| C | 2.34501400  | -0.70368700 | -0.24294500 |
| H | 2.84399600  | -1.67810800 | -0.13559200 |
| H | 1.79333400  | -0.72419500 | -1.20479500 |
| O | 1.45971800  | -0.60969900 | 0.85292000  |
| F | 0.05831600  | 0.97068700  | -1.24554500 |
| F | -1.13370900 | 1.80484900  | 0.38352600  |
| C | -1.31236400 | -0.48354100 | -0.05416900 |
| F | -2.42832300 | -0.18496400 | -0.70977600 |
| F | -1.63538000 | -0.88214600 | 1.17424700  |
| F | -0.71314700 | -1.48870400 | -0.68944300 |
| O | 3.24708400  | 0.27422900  | -0.34774800 |

#### AIM4b-TS1

0 2

|   |             |             |            |
|---|-------------|-------------|------------|
| C | -0.34494600 | 0.65427400  | 0.08178700 |
| C | 0.80900700  | 0.24730800  | 0.98276000 |
| H | 1.46278400  | 1.11617200  | 1.07619500 |
| H | 0.41731600  | -0.04464600 | 1.95669400 |

|   |             |             |             |
|---|-------------|-------------|-------------|
| C | 2.68460500  | -0.60303200 | -0.18500500 |
| H | 3.69770600  | -1.01769500 | 1.04359200  |
| H | 3.02311900  | -1.52132200 | -0.68368200 |
| O | 1.49101000  | -0.85976500 | 0.42906000  |
| F | 0.09870200  | 0.97210500  | -1.14870700 |
| F | -0.93015100 | 1.74650900  | 0.62156100  |
| C | -1.44897700 | -0.40668400 | -0.08862000 |
| F | -2.48039600 | 0.10250800  | -0.75132900 |
| F | -1.87293400 | -0.80804300 | 1.11219300  |
| F | -0.99829800 | -1.46350600 | -0.75333800 |
| O | 3.11506900  | 0.50603200  | -0.41177900 |

### AIM5b

0 1

|   |             |             |             |
|---|-------------|-------------|-------------|
| C | -0.29813600 | 0.65616600  | 0.04770100  |
| C | 0.84173900  | 0.28952600  | 0.98219500  |
| H | 1.51039000  | 1.15002100  | 1.03168400  |
| H | 0.44095200  | 0.05639800  | 1.96748600  |
| C | 2.68249800  | -0.66279400 | -0.14906300 |
| H | 3.06609200  | -1.63221800 | -0.48442700 |
| O | 1.51342900  | -0.86052700 | 0.49924800  |
| F | 0.16489500  | 0.89446300  | -1.19443600 |
| F | -0.87287200 | 1.78581400  | 0.51478800  |
| C | -1.41446000 | -0.39881300 | -0.07363300 |
| F | -2.43418200 | 0.08658400  | -0.77074400 |
| F | -1.85125300 | -0.72939800 | 1.14371600  |
| F | -0.97158800 | -1.49497800 | -0.67715500 |
| O | 3.21128500  | 0.39039200  | -0.31218000 |

### AIM4b-TS2

0 2

|   |             |             |             |
|---|-------------|-------------|-------------|
| C | -0.71996400 | 0.79509500  | 0.66850300  |
| C | 0.55333600  | 0.02444500  | 0.98041200  |
| H | 1.38596500  | 0.66027100  | 0.67045000  |
| H | 0.59844000  | -0.15845500 | 2.05441000  |
| C | 1.33747400  | -1.30301000 | -0.84616200 |
| H | 2.38557300  | -1.87897000 | -0.46258500 |
| H | 0.93468200  | -2.12748200 | -1.45995100 |
| O | 0.55319800  | -1.21323100 | 0.31243700  |
| F | -0.83820100 | 1.01345100  | -0.65527300 |
| F | -0.65157700 | 1.99264300  | 1.29359900  |
| C | -2.02326900 | 0.12112600  | 1.13770500  |
| F | -3.05302100 | 0.94519800  | 0.97807000  |
| F | -1.92728100 | -0.18824500 | 2.43336000  |

|   |             |             |             |
|---|-------------|-------------|-------------|
| F | -2.26314000 | -0.99072600 | 0.45392700  |
| O | 1.82599400  | -0.28677700 | -1.39152000 |
| O | 3.82708200  | -1.73521900 | -0.06780900 |
| O | 4.14748600  | -0.62965100 | -0.40093700 |

## AIM6b

0 1

|   |             |             |             |
|---|-------------|-------------|-------------|
| C | -0.72402100 | 0.89177400  | 0.27460400  |
| C | 0.55278900  | 0.11150400  | 0.53593000  |
| H | 1.38705800  | 0.73869700  | 0.21870100  |
| H | 0.62597400  | -0.11801300 | 1.59788600  |
| C | 1.23634500  | -1.17110000 | -1.32461400 |
| H | 1.09824800  | -2.16075600 | -1.77281400 |
| O | 0.52684300  | -1.11301000 | -0.17603100 |
| F | -0.87251300 | 1.13008000  | -1.04264200 |
| F | -0.62740600 | 2.07652100  | 0.91626600  |
| C | -2.01881700 | 0.21860800  | 0.76812200  |
| F | -3.04795800 | 1.04637800  | 0.63823500  |
| F | -1.89183100 | -0.10237900 | 2.05765100  |
| F | -2.27401800 | -0.88719100 | 0.07953400  |
| O | 1.90916800  | -0.29423500 | -1.76492700 |

## HOO

0 2

|   |            |             |             |
|---|------------|-------------|-------------|
| H | 3.50440800 | -2.11504000 | -1.22230600 |
| O | 3.89320500 | -1.71172600 | -0.42654500 |
| O | 4.25700600 | -0.50312900 | -0.7672170  |
