# Supplementary material
Source: Royal Society of Chemistry journal article supplement (doi:10.1039/d6cp00332j)
Supplement: d6cp00332j2.pdf [file d6cp00332j2.pdf]

## **Supporting Information**

### **Atmospheric Fate of CF<sub>3</sub>CF<sub>2</sub>CH<sub>2</sub>OCH<sub>3</sub> (HFE-365mcf3) Initiated by OH Radicals and Cl Atoms: Insights into the Mechanisms, Conformer-Weighted Kinetics, and Atmospheric Loss Processes**

Rabu Ranjan Changmai, Samsung Raja Daimari, Anand Kumar Yadav, and Manabendra  
Sarma\*

*Department of Chemistry, IIT Guwahati, Guwahati -781039, Assam, India*

Email: [msarma@iitg.ac.in](mailto:msarma@iitg.ac.in)

The Supporting Information consists of four files - Supporting Information.pdf, SI2-Cartesian coordinates.pdf, SI3-Frequencies.xlsx, and SI4-Kinetics.xlsx. The Supporting Information file contains the conformational analysis, optimized energies of all the species involved in the reaction of A with OH and Cl, single point energies, *T1*-diagnostic and spin contamination values, relative energy profiles, individual rate coefficients, geometries of species involved in R1 and R5 at the M06-2X/6-311++G(d,p) level of theory, and all information on the degradation of the subsequent product radicals. The other three files include the Cartesian coordinates, vibrational frequencies of all the species involved in the reactions, and kinetics of the reactions.

## Table of Contents

| SI No.           | Description                                                                                                                                                                                                                                                   | Page No.   |
|------------------|---------------------------------------------------------------------------------------------------------------------------------------------------------------------------------------------------------------------------------------------------------------|------------|
| <b>Table S1</b>  | Conformational search of HFE-365mcf3 using Conformer-Rotamer Ensemble Sampling Tool (CREST) followed by optimization at the M06-2X/6-311++G(d,p) level of theory.                                                                                             | <b>S8</b>  |
| <b>Table S2</b>  | Corrected zero-point energies (EE+ZPE), enthalpies (H), and Gibbs free energies (G) of the species computed at the M06-2X/6-311++G(d,p) level for the reaction pathways <b>R1</b> , <b>R2</b> , <b>R3</b> , and <b>R4</b> . All energies are in Hartree.      | <b>S9</b>  |
| <b>Table S3</b>  | Corrected zero-point energies (EE+ZPE), enthalpies (H), and Gibbs free energies (G) of the species computed at the M06-2X/6-311++G(d,p) level for the reaction pathways <b>R5</b> , <b>R6</b> , <b>R7</b> , and <b>R8</b> . All energies are in Hartree.      | <b>S13</b> |
| <b>Notes S1</b>  | Exception for the reaction of conformer A2 with Cl atoms.                                                                                                                                                                                                     | <b>S17</b> |
| <b>Table S4</b>  | Energy comparison of the species involved in Pathway R6a and corresponding single point energies at the M06-2X/6-311++G(d,p) and MP2/6-311++G(d,p) level of theory, that have been used for the preparation of energy profiles.                               | <b>S18</b> |
| <b>Table S5</b>  | Corrected zero-point energies (EE+ZPE), enthalpies (H), and Gibbs free energies (G) of the species computed at the MP2/6-311++G(d,p) level for the reaction pathway <b>R6b</b> . All energies are in Hartree.                                                 | <b>S18</b> |
| <b>Table S6</b>  | The enthalpy change ( $\Delta H$ ) and Gibbs free energy change ( $\Delta G$ ) for the reaction pathways <b>R1-R8</b> .                                                                                                                                       | <b>S19</b> |
| <b>Scheme S1</b> | Reaction pathways of conformer A1 with $\cdot\text{OH}$ and Cl, including the enthalpies and Gibbs free energy changes ( $\Delta H^0$ and $\Delta G^0$ ). Calculations are at the M06-2X/6-311++G(d,p) level of theory at 298 K and energies are in kcal/mol. | <b>S20</b> |
| <b>Figure S1</b> | Optimized structure of the species involved in the reaction pathways <b>R1</b> and <b>R5</b> at the M06-2X/6-311++G(d,p) level of theory.                                                                                                                     | <b>S23</b> |
| <b>Table S7</b>  | Zero-point and SOC corrected relative energies of the species involved in the pathways R1 and R5 at the CCSD(T)//M06-                                                                                                                                         | <b>S24</b> |

|                  |                                                                                                                                                                                                                                                                                                                |            |
|------------------|----------------------------------------------------------------------------------------------------------------------------------------------------------------------------------------------------------------------------------------------------------------------------------------------------------------|------------|
|                  | 2X/6-311++G(d,p) level of theory along with the relative energies (RE).                                                                                                                                                                                                                                        |            |
| <b>Notes S2</b>  | Natural Bond Orbital (NBO) Analysis.                                                                                                                                                                                                                                                                           | <b>S25</b> |
| <b>Table S8</b>  | Single point and relative energies of all the species involved in the reaction pathways <b>R1-R8</b> at the CCSD(T)//M06-2X/6-311++G(d,p) level of theory with zero-point energy corrections (ZPE) and spin-orbit coupling corrections (SOC) for the reaction of HFE-365mcf3 with OH and Cl atoms.             | <b>S27</b> |
| <b>Figure S2</b> | Relative energy profile diagram for the reaction pathways <b>R2-R4</b> at the CCSD(T)/6-311++G(d,p)// M06-2X/6-311++G(d,p) level of theory with zero-point energy and spin-orbit coupling corrections. Energies are in kcal/mol.                                                                               | <b>S35</b> |
| <b>Figure S3</b> | Relative energy profile diagram for the reaction pathways <b>R6-R8</b> at the CCSD(T)/6-311++G(d,p)//M06-2X/6-311++G(d,p) level of theory with zero-point energy and spin-orbit coupling corrections. Energies are in kcal/mol.                                                                                | <b>S36</b> |
| <b>Table S9</b>  | <i>T1</i> -diagnostic and spin-contamination $\langle S^2 \rangle$ values of all the stationary points that are involved in the reaction of HFE-365mcf3 with $\cdot$ OH and Cl atoms (reaction pathways <b>R1-R8</b> ), calculated at the CCSD(T)/6-311++G(d,p) level of theory.                               | <b>S37</b> |
| <b>Figure S4</b> | Optimized geometries of (a) CR1b and (b) TS1b for the OH-initiated pathway R1b, and (c) CR5c and (d) TS5c for the Cl-initiated pathway R5c, calculated at the M06-2X/6-311++G(d,p) level of theory. Bond lengths (in Å) corresponding to the breaking of C–H bond and the forming O–H or Cl–H bonds are shown. | <b>S45</b> |
| <b>Notes S3</b>  | Kinetic Model Derivation.                                                                                                                                                                                                                                                                                      | <b>S46</b> |
| <b>Figure S5</b> | Schematic representation of the reaction pathways (a) forward energy barrier is greater than reverse energy barrier, and (b) reverse energy barrier is greater than forward energy barrier, with respect to pre-reactive complex CR.                                                                           | <b>S47</b> |
| <b>Table S10</b> | Calculated equilibrium constant ( $K_{eq}$ ), unimolecular rate                                                                                                                                                                                                                                                | <b>S48</b> |

|                  |                                                                                                                                                                                                                                              |            |
|------------------|----------------------------------------------------------------------------------------------------------------------------------------------------------------------------------------------------------------------------------------------|------------|
|                  | coefficient ( $k_{uni}$ ), and total rate coefficients ( $k_{1a}$ ) for the reaction pathway <b>R1a</b> in the temperature range 200-400 K at the M06-2X level.                                                                              |            |
| <b>Table S11</b> | Calculated equilibrium constant ( $K_{eq}$ ), unimolecular rate coefficient ( $k_{uni}$ ), and total rate coefficients ( $k_{1b}$ ) for the reaction pathway <b>R1b</b> in the temperature range 200-400 K at the M06-2X level.              | <b>S49</b> |
| <b>Table S12</b> | Calculated equilibrium constant ( $K_{eq}$ ), unimolecular rate coefficient ( $k_{uni}$ ), and total rate coefficients ( <b>Total</b> $k_{1c}$ ) for the reaction pathway <b>R1c</b> in the temperature range 200-400 K at the M06-2X level. | <b>S50</b> |
| <b>Table S13</b> | Calculated equilibrium constant ( $K_{eq}$ ), unimolecular rate coefficient ( $k_{uni}$ ), and total rate coefficients ( $k_{2a}$ ) for the reaction pathway <b>R2a</b> in the temperature range 200-400 K at the M06-2X level.              | <b>S51</b> |
| <b>Table S14</b> | Calculated equilibrium constant ( $K_{eq}$ ), unimolecular rate coefficient ( $k_{uni}$ ), and total rate coefficients ( $k_{2b}$ ) for the reaction pathway <b>R2b</b> in the temperature range 200-400 K at the M06-2X level.              | <b>S52</b> |
| <b>Table S15</b> | Calculated equilibrium constant ( $K_{eq}$ ), unimolecular rate coefficient ( $k_{uni}$ ), and total rate coefficients ( <b>Total</b> $k_{2c}$ ) for the reaction pathway <b>R2c</b> in the temperature range 200-400 K at the M06-2X level. | <b>S53</b> |
| <b>Table S16</b> | Calculated equilibrium constant ( $K_{eq}$ ), unimolecular rate coefficient ( $k_{uni}$ ), and total rate coefficients ( $k_{3a}$ ) for the reaction pathway <b>R3a</b> in the temperature range 200-400 K at the M06-2X level.              | <b>S54</b> |
| <b>Table S17</b> | Calculated equilibrium constant ( $K_{eq}$ ), unimolecular rate coefficient ( $k_{uni}$ ), and total rate coefficients ( $k_{3b}$ ) for the reaction pathway <b>R3b</b> in the temperature range 200-400 K at the M06-2X level.              | <b>S55</b> |
| <b>Table S18</b> | Calculated equilibrium constant ( $K_{eq}$ ), unimolecular rate coefficient ( $k_{uni}$ ), and total rate coefficients ( <b>Total</b> $k_{3c}$ ) for the                                                                                     | <b>S56</b> |

|                  |                                                                                                                                                                                                                                                                                                                                |            |
|------------------|--------------------------------------------------------------------------------------------------------------------------------------------------------------------------------------------------------------------------------------------------------------------------------------------------------------------------------|------------|
|                  | reaction pathway <b>R3c</b> in the temperature range 200-400 K at the M06-2X level.                                                                                                                                                                                                                                            |            |
| <b>Table S19</b> | Calculated equilibrium constant ( $K_{eq}$ ), unimolecular rate coefficient ( $k_{uni}$ ), and total rate coefficients ( $Total k_{4a}$ ) for the reaction pathway <b>R4a</b> in the temperature range 200-400 K at the M06-2X level.                                                                                          | <b>S57</b> |
| <b>Table S20</b> | Calculated equilibrium constant ( $K_{eq}$ ), unimolecular rate coefficient ( $k_{uni}$ ), and total rate coefficients ( $Total k_{4b}$ ) for the reaction pathway <b>R4c</b> in the temperature range 200-400 K at the M06-2X level.                                                                                          | <b>S58</b> |
| <b>Table S21</b> | Calculated equilibrium constant ( $K_{eq}$ ), unimolecular rate coefficient ( $k_{uni}$ ), and total rate coefficients ( $k_{5a}$ ) for the reaction pathway <b>R5a</b> in the temperature range 200-400 K at the M06-2X level.                                                                                                | <b>S59</b> |
| <b>Table S22</b> | Calculated equilibrium constant ( $K_{eq}$ ), unimolecular rate coefficient ( $k_{uni}$ ), reverse reaction rate coefficient ( $k_r$ ), forward reaction rate coefficient ( $k_f$ ) and total rate coefficients ( $k_{5b}$ ) for the reaction pathway <b>R5b</b> in the temperature range 200-400 K at the M06-2X level.       | <b>S60</b> |
| <b>Table S23</b> | Calculated equilibrium constant ( $K_{eq}$ ), unimolecular rate coefficient ( $k_{uni}$ ), reverse reaction rate coefficient ( $k_r$ ), forward reaction rate coefficient ( $k_f$ ) and total rate coefficients ( $Total k_{5c}$ ) for the reaction pathway <b>R5c</b> in the temperature range 200-400 K at the M06-2X level. | <b>S61</b> |
| <b>Table S24</b> | Calculated equilibrium constant ( $K_{eq}$ ), unimolecular rate coefficient ( $k_{uni}$ ), reverse reaction rate coefficient ( $k_r$ ), forward reaction rate coefficient ( $k_f$ ) and total rate coefficients ( $k_{6a}$ ) for the reaction pathway <b>R6a</b> in the temperature range 200-400 K at the M06-2X level.       | <b>S62</b> |
| <b>Table S25</b> | Calculated equilibrium constant ( $K_{eq}$ ), unimolecular rate coefficient ( $k_{uni}$ ), reverse reaction rate coefficient ( $k_r$ ), forward reaction rate coefficient ( $k_f$ ) and total rate coefficients ( $Total k_{6c}$ ) for the reaction pathway <b>R6c</b> in the temperature                                      | <b>S63</b> |

|                  |                                                                                                                                                                                                                                                                                                                                                                                                                                                                                                                                                                                             |            |
|------------------|---------------------------------------------------------------------------------------------------------------------------------------------------------------------------------------------------------------------------------------------------------------------------------------------------------------------------------------------------------------------------------------------------------------------------------------------------------------------------------------------------------------------------------------------------------------------------------------------|------------|
|                  | range 200-400 K at the M06-2X level.                                                                                                                                                                                                                                                                                                                                                                                                                                                                                                                                                        |            |
| <b>Table S26</b> | Calculated equilibrium constant ( $K_{eq}$ ), unimolecular rate coefficient ( $k_{uni}$ ), and total rate coefficients ( $k_{7a}$ ) for the reaction pathway <b>R7a</b> in the temperature range 200-400 K at the M06-2X level.                                                                                                                                                                                                                                                                                                                                                             | <b>S64</b> |
| <b>Table S27</b> | Calculated equilibrium constant ( $K_{eq}$ ), unimolecular rate coefficient ( $k_{uni}$ ), and total rate coefficients ( $k_{7b}$ ) for the reaction pathway <b>R7b</b> in the temperature range 200-400 K at the M06-2X level.                                                                                                                                                                                                                                                                                                                                                             | <b>S65</b> |
| <b>Table S28</b> | Calculated equilibrium constant ( $K_{eq}$ ), unimolecular rate coefficient ( $k_{uni}$ ), reverse reaction rate coefficient ( $k_r$ ), forward reaction rate coefficient ( $k_f$ ) and total rate coefficients ( <b>Total <math>k_{7c}</math></b> ) for the reaction pathway <b>R7c</b> in the temperature range 200-400 K at the M06-2X level.                                                                                                                                                                                                                                            | <b>S66</b> |
| <b>Table S29</b> | Calculated equilibrium constant ( $K_{eq}$ ), unimolecular rate coefficient ( $k_{uni}$ ), reverse reaction rate coefficient ( $k_r$ ), forward reaction rate coefficient ( $k_f$ ) and total rate coefficients ( <b>Total <math>k_{8a}</math></b> ) for the reaction pathway <b>R8a</b> in the temperature range 200-400 K at the M06-2X level.                                                                                                                                                                                                                                            | <b>S67</b> |
| <b>Table S30</b> | Calculated equilibrium constant ( $K_{eq}$ ), unimolecular rate coefficient ( $k_{uni}$ ), reverse reaction rate coefficient ( $k_r$ ), forward reaction rate coefficient ( $k_f$ ) and total rate coefficients ( <b>Total <math>k_{8b}</math></b> ) for the reaction pathway <b>R8c</b> in the temperature range 200-400 K at the M06-2X level.                                                                                                                                                                                                                                            | <b>S68</b> |
| <b>Figure S6</b> | Comparison of the previously reported rate coefficients ( $\text{cm}^3 \text{molecule}^{-1} \text{s}^{-1}$ ) from the works of Oyaro <i>et al.</i> <sup>1</sup> , Thomsen <i>et al.</i> <sup>2</sup> , Urata <i>et al.</i> <sup>3</sup> , Blazquez <i>et al.</i> <sup>4</sup> , Calvert <i>et al.</i> <sup>5</sup> , and Bhattacharjee <i>et al.</i> <sup>6</sup> for the reaction of HFE-365mcf3 with $\cdot\text{OH}$ and $\text{Cl}$ obtained at the M06-2X level in the 200–400 K temperature range, with the computed rate coefficients as a function of $1000/T$ ( $\text{K}^{-1}$ ). | <b>S69</b> |
| <b>Notes S4</b>  | Radiative efficiency (RE) calculations.                                                                                                                                                                                                                                                                                                                                                                                                                                                                                                                                                     | <b>S70</b> |
| <b>Table S31</b> | Frequencies and intensities of HFE-365mcf3 calculated at the                                                                                                                                                                                                                                                                                                                                                                                                                                                                                                                                | <b>S70</b> |

|                  |                                                                                                                                                                                                                                                                                                          |            |
|------------------|----------------------------------------------------------------------------------------------------------------------------------------------------------------------------------------------------------------------------------------------------------------------------------------------------------|------------|
|                  | M06-2X/6-311++G(d,p) level of theory.                                                                                                                                                                                                                                                                    |            |
| <b>Table S32</b> | Corrected zero-point energies (EE+ZPE), enthalpies (H), and Gibbs free energies (G) of the species involved in the loss processes of product radical P1A, in the presence and absence of O <sub>2</sub> . Energies are in Hartree and all the calculations are in M06-2X/6-311++G(d,p) level of theory.  | <b>S72</b> |
| <b>Table S33</b> | Corrected zero-point energies (EE+ZPE), enthalpies (H), and Gibbs free energies (G) of the species involved in the loss processes of product radical AIM5, in the presence and absence of O <sub>2</sub> . Energies are in Hartree and all the calculations are in M06-2X/6-311++G(d,p) level of theory. | <b>S73</b> |
| <b>Table S34</b> | Corrected zero-point energies (EE+ZPE), enthalpies (H), and Gibbs free energies (G) of the species involved in the loss processes of product radical P1B, in the presence and absence of O <sub>2</sub> . Energies are in Hartree and all the calculations are in M06-2X/6-311++G(d,p) level of theory.  | <b>S74</b> |
| <b>Table S35</b> | Rotational constants of the species involved in the reaction pathways <b>R1-R8</b> at the M06-2X/6-311++G(d,p) level of theory.                                                                                                                                                                          | <b>S75</b> |

**Table S1:** Conformational search of HFE-365mcf3 using Conformer-Rotamer Ensemble Sampling Tool (CREST) followed by optimization at the M06-2X/6-311++G(d,p) level of theory.

| <i>Conformers</i> | <i>Structures</i> | <i>EE + ZPE (Hartree)</i> | <i>Gibbs Energy (Hartree)</i> | <i>Relative Gibbs Energy (Hartree)</i> | <i>Population</i> |
|-------------------|-------------------|---------------------------|-------------------------------|----------------------------------------|-------------------|
| <i>A1</i>         | Structure-1       | -729.73738                | -729.77288                    | 0.00021                                | 0.27728           |
| <i>A2</i>         | Structure-2       | -729.73678                | -729.77309                    | 0.00000                                | 0.34529           |
| <i>A3</i>         | Structure-3       | -729.73583                | -729.77210                    | 0.00099                                | 0.12081           |
| <i>A4</i>         | Structure-4       | -729.73589                | -729.77246                    | 0.00063                                | 0.17673           |
| <i>A5</i>         | Structure-5       | -729.73538                | -729.77101                    | 0.00209                                | 0.03770           |
| <i>A6</i>         | Structure-6       | -729.73538                | -729.77100                    | 0.00210                                | 0.03750           |
| <i>A7</i>         | Structure-7       | -729.73278                | -729.76838                    | 0.00472                                | 0.00233           |
| <i>A8</i>         | Structure-8       | -729.73278                | -729.76839                    | 0.00471                                | 0.00236           |

At **298 K**, we have shortlisted four conformers, **A1**, **A2**, **A3**, and **A4**. Furthermore, we have considered these four conformers to determine the Boltzmann population distribution within the 200-400 K temperature range.

| <i>Temperature</i> | <i>POP-A1</i> | <i>POP-A2</i> | <i>POP-A3</i> | <i>POP-A4</i> |
|--------------------|---------------|---------------|---------------|---------------|
| <b>200</b>         | 0.3137        | 0.4350        | 0.0910        | 0.1604        |
| <b>220</b>         | 0.3112        | 0.4188        | 0.1010        | 0.1691        |
| <b>240</b>         | 0.3085        | 0.4051        | 0.1100        | 0.1764        |
| <b>260</b>         | 0.3060        | 0.3934        | 0.1181        | 0.1826        |
| <b>280</b>         | 0.3035        | 0.3833        | 0.1253        | 0.1879        |
| <b>298</b>         | 0.3014        | 0.3753        | 0.1313        | 0.1921        |
| <b>300</b>         | 0.3011        | 0.3744        | 0.1319        | 0.1925        |
| <b>320</b>         | 0.2989        | 0.3667        | 0.1379        | 0.1965        |
| <b>340</b>         | 0.2969        | 0.3598        | 0.1433        | 0.2000        |
| <b>360</b>         | 0.2949        | 0.3537        | 0.1483        | 0.2031        |
| <b>380</b>         | 0.2931        | 0.3482        | 0.1528        | 0.2059        |
| <b>400</b>         | 0.2915        | 0.3432        | 0.1570        | 0.2084        |

**Table S2:** Corrected zero-point energies (EE+ZPE), enthalpies (H), and Gibbs free energies (G) of the species computed at the M06-2X/6-311++G(d,p) level for the reaction pathways **R1**, **R2**, **R3**, and **R4**. All energies are in Hartree.

| <i>R1</i>             |                 |                     |                              |
|-----------------------|-----------------|---------------------|------------------------------|
| <i>Species</i>        | <i>EE + ZPE</i> | <i>Enthalpy (H)</i> | <i>Gibbs Free Energy (G)</i> |
| <b>A1</b>             | -729.7373       | -729.7266           | -729.7728                    |
| <b>OH</b>             | -75.7179        | -75.7146            | -75.7348                     |
| <b>CR1a</b>           | -805.4613       | -805.4473           | -805.5027                    |
| <b>TS1a</b>           | -805.4549       | -805.4420           | -805.4941                    |
| <b>PC1a</b>           | -805.4943       | -805.4795           | -805.5358                    |
| <b>P1a</b>            | -729.0889       | -729.0782           | -729.1247                    |
| <b>CR1b</b>           | -805.4630       | -805.4493           | -805.5030                    |
| <b>TS1b</b>           | -805.4554       | -805.4424           | -805.4952                    |
| <b>PC1b</b>           | -805.4993       | -805.4846           | -805.5405                    |
| <b>P1b</b>            | -729.0914       | -729.0802           | -729.1289                    |
| <b>CR1c</b>           | -805.4621       | -805.4484           | -805.5040                    |
| <b>TS1c</b>           | -805.4543       | -805.4414           | -805.4948                    |
| <b>PC1c</b>           | -805.4935       | -805.4788           | -805.5364                    |
| <b>P1c</b>            | -729.0870       | -729.0762           | -729.1236                    |
| <b>H<sub>2</sub>O</b> | -76.3992        | -76.3955            | -76.4175                     |

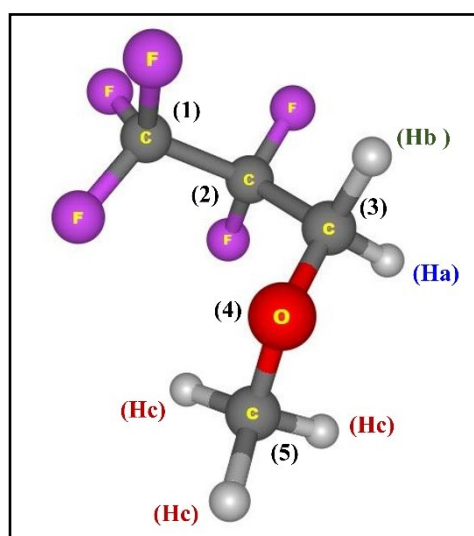

**A1**

| <i>R2</i>             |                 |                     |                              |
|-----------------------|-----------------|---------------------|------------------------------|
| <i>Species</i>        | <i>EE + ZPE</i> | <i>Enthalpy (H)</i> | <i>Gibbs Free Energy (G)</i> |
| <b>A2</b>             | -729.7367       | -729.7258           | -729.7730                    |
| <b>OH</b>             | -75.7179        | -75.7146            | -75.7348                     |
| <b>CR2a</b>           | -805.4631       | -805.4494           | -805.5033                    |
| <b>TS2a</b>           | -805.4554       | -805.4424           | -805.4952                    |
| <b>PC2a</b>           | -805.4994       | -805.4846           | -805.5409                    |
| <b>P2a</b>            | -729.0914       | -729.0802           | -729.1289                    |
| <b>CR2b</b>           | -805.4634       | -805.4497           | -805.5041                    |
| <b>TS2b</b>           | -805.4553       | -805.4422           | -805.4952                    |
| <b>PC2b</b>           | -805.4991       | -805.4843           | -805.5412                    |
| <b>P2b</b>            | -729.0913       | -729.0800           | -729.1292                    |
| <b>CR2c</b>           | -805.4583       | -805.4437           | -805.5012                    |
| <b>TS2c</b>           | -805.4530       | -805.4399           | -805.4939                    |
| <b>PC2c</b>           | -805.4933       | -805.4788           | -805.5348                    |
| <b>P2c</b>            | -729.0865       | -729.0755           | -729.1235                    |
| <b>H<sub>2</sub>O</b> | -76.3992        | -76.3955            | -76.4175                     |

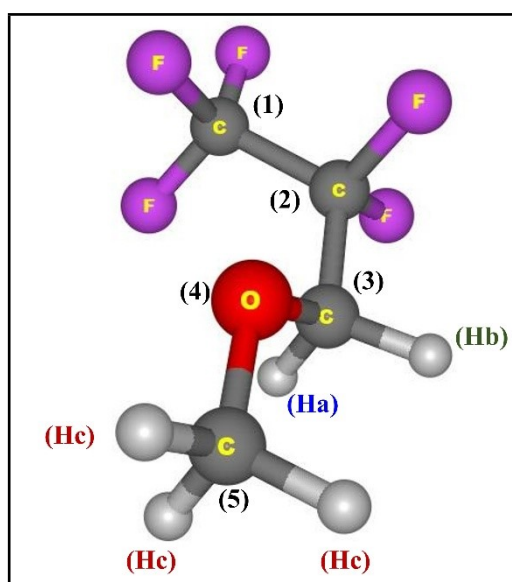

**A2**

| <i>R3</i>        |                 |                     |                              |
|------------------|-----------------|---------------------|------------------------------|
| <i>Species</i>   | <i>EE + ZPE</i> | <i>Enthalpy (H)</i> | <i>Gibbs Free Energy (G)</i> |
| A3               | -729.7358       | -729.7250           | -729.7721                    |
| OH               | -75.7179        | -75.7146            | -75.7348                     |
| CR3a             | -805.4632       | -805.4492           | -805.5042                    |
| TS3a             | -805.4541       | -805.4409           | -805.4944                    |
| PC3a             | -805.4996       | -805.4846           | -805.5421                    |
| P3a              | -729.0912       | -729.0799           | -729.1289                    |
| CR3b             | -805.4600       | -805.4461           | -805.5005                    |
| TS3b             | -805.4537       | -805.4408           | -805.4930                    |
| PC3b             | -805.4953       | -805.4806           | -805.5370                    |
| P3b              | -729.0900       | -729.0791           | -729.1265                    |
| CR3c             | -805.4616       | -805.4476           | -805.5038                    |
| TS3c             | -805.4530       | -805.4401           | -805.4931                    |
| PC3c             | -805.4931       | -805.4787           | -805.5338                    |
| P3c              | -729.0861       | -729.0752           | -729.1234                    |
| H <sub>2</sub> O | -76.3992        | -76.3955            | -76.4175                     |

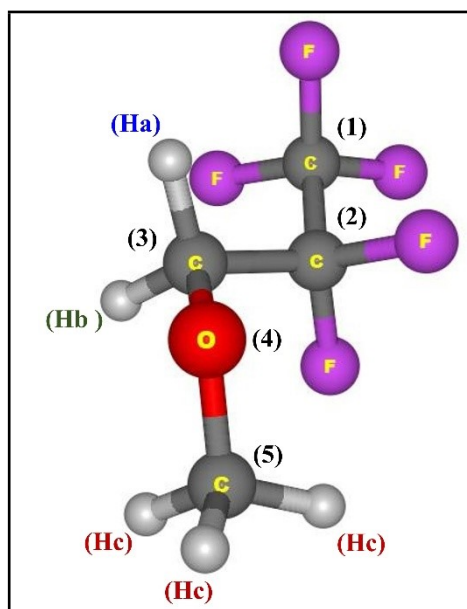

A3

| <i>R4</i>        |                 |                     |                              |
|------------------|-----------------|---------------------|------------------------------|
| <i>Species</i>   | <i>EE + ZPE</i> | <i>Enthalpy (H)</i> | <i>Gibbs Free Energy (G)</i> |
| A4               | -729.7358       | -729.7248           | -729.7724                    |
| OH               | -75.7179        | -75.7146            | -75.7348                     |
| CR4a             | -805.4630       | -805.4492           | -805.5036                    |
| TS4a             | -805.4542       | -805.4409           | -805.4945                    |
| PC4a             | -805.4994       | -805.4846           | -805.5415                    |
| P4a              | -729.0912       | -729.0799           | -729.1287                    |
| CR4c             | -805.4635       | -805.4503           | -805.5031                    |
| TS4c             | -805.4537       | -805.4406           | -805.4951                    |
| PC4c             | -805.4929       | -805.4784           | -805.5344                    |
| P4c              | -729.0859       | -729.0748           | -729.1231                    |
| H <sub>2</sub> O | -76.3992        | -76.3955            | -76.4175                     |

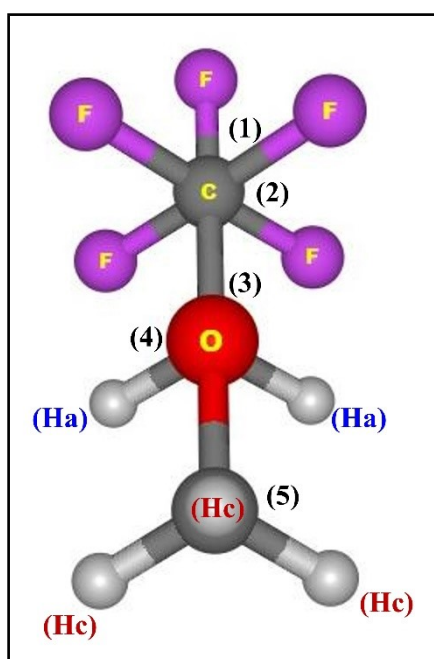

A4

\*For the conformer A4, the H-atoms attached to the central carbon atom C3 are indistinguishable, thus  $H_a=H_b$

**Table S3:** Corrected zero-point energies (EE+ZPE), enthalpies (H), and Gibbs free energies (G) of the species computed at the M06-2X/6-311++G(d,p) level for the reaction pathways **R5**, **R6**, **R7**, and **R8**. All energies are in Hartree.

| <i>R5</i>      |                 |                     |                              |
|----------------|-----------------|---------------------|------------------------------|
| <i>Species</i> | <i>EE + ZPE</i> | <i>Enthalpy (H)</i> | <i>Gibbs Free Energy (G)</i> |
| <b>A1</b>      | -729.7373       | -729.7266           | -729.7728                    |
| <b>Cl</b>      | -460.1326       | -460.1303           | -460.1483                    |
| <b>CR5a</b>    | -1189.8744      | -1189.8613          | -1189.9163                   |
| <b>TS5a</b>    | -1189.8773      | -1189.8648          | -1189.9168                   |
| <b>PC5a</b>    | -1189.8823      | -1189.8685          | -1189.9242                   |
| <b>P5a</b>     | -729.0889       | -729.0782           | -729.1247                    |
| <b>CR5b</b>    | -1189.8785      | -1189.8655          | -1189.9190                   |
| <b>TS5b</b>    | -1189.8776      | -1189.8648          | -1189.9180                   |
| <b>PC5b</b>    | -1189.8867      | -1189.8731          | -1189.9282                   |
| <b>P5b</b>     | -729.0913       | -729.0800           | -729.1291                    |
| <b>CR5c</b>    | -1189.8803      | -1189.8673          | -1189.9211                   |
| <b>TS5c</b>    | -1189.8798      | -1189.8674          | -1189.9202                   |
| <b>PC5c</b>    | -1189.8823      | -1189.8686          | -1189.9247                   |
| <b>P5c</b>     | -729.0870       | -729.0762           | -729.1236                    |
| <b>HCl</b>     | -460.7896       | -460.7863           | -460.8075                    |

| <i>R6</i>      |                 |                     |                              |
|----------------|-----------------|---------------------|------------------------------|
| <i>Species</i> | <i>EE + ZPE</i> | <i>Enthalpy (H)</i> | <i>Gibbs Free Energy (G)</i> |
| <b>A2</b>      | -729.7367       | -729.7258           | -729.7730                    |
| <b>Cl</b>      | -460.1326       | -460.1303           | -460.1483                    |
| <b>CR6a</b>    | -1189.8784      | -1189.8654          | -1189.9188                   |
| <b>TS6a</b>    | -1189.8776      | -1189.8647          | -1189.9180                   |
| <b>PC6a</b>    | -1189.8873      | -1189.8724          | -1189.9326                   |
| <b>P6a</b>     | -729.0914       | -729.0802           | -729.1289                    |
| <b>CR6c</b>    | -1189.8786      | -1189.8655          | -1189.9204                   |
| <b>TS6c</b>    | -1189.8794      | -1189.8668          | -1189.9208                   |
| <b>PC6c</b>    | -1189.8810      | -1189.8673          | -1189.9238                   |
| <b>P6c</b>     | -729.0865       | -729.0755           | -729.1235                    |
| <b>HCl</b>     | -460.7896       | -460.7863           | -460.8075                    |

**\*For information on reaction pathway R6b, please refer to Notes S1.**

| <i>R7</i>      |                 |                     |                              |
|----------------|-----------------|---------------------|------------------------------|
| <i>Species</i> | <i>EE + ZPE</i> | <i>Enthalpy (H)</i> | <i>Gibbs Free Energy (G)</i> |
| <b>A3</b>      | -729.7358       | -729.7250           | -729.7721                    |
| <b>Cl</b>      | -460.1326       | -460.1303           | -460.1483                    |
| <b>CR7a</b>    | -1189.8779      | -1189.8648          | -1189.9193                   |
| <b>TS7a</b>    | -1189.8765      | -1189.8636          | -1189.9179                   |
| <b>PC7a</b>    | -1189.8878      | -1189.8733          | -1189.9307                   |
| <b>P7a</b>     | -729.0912       | -729.0799           | -729.1288                    |
| <b>CR7b</b>    | -1189.8733      | -1189.8860          | -1189.9153                   |
| <b>TS7b</b>    | -1189.8713      | -1189.8589          | -1189.9116                   |
| <b>PC7b</b>    | -1189.8851      | -1189.8713          | -1189.9270                   |
| <b>P7b</b>     | -729.0900       | -729.0791           | -729.1265                    |
| <b>CR7c</b>    | -1189.8789      | -1189.8659          | -1189.9202                   |
| <b>TS7c</b>    | -1189.8794      | -1189.8669          | -1189.9200                   |
| <b>PC7c</b>    | -1189.8821      | -1189.8690          | -1189.9231                   |
| <b>P7c</b>     | -729.0862       | -729.0753           | -729.1230                    |
| <b>HCl</b>     | -460.7896       | -460.7863           | -460.8075                    |

| <b>R8</b>      |                 |                     |                              |
|----------------|-----------------|---------------------|------------------------------|
| <b>Species</b> | <b>EE + ZPE</b> | <b>Enthalpy (H)</b> | <b>Gibbs Free Energy (G)</b> |
| <b>A4</b>      | -729.7358       | -729.7248           | -729.7724                    |
| <b>Cl</b>      | -460.1326       | -460.1303           | -460.1483                    |
| <b>CR8a</b>    | -1189.8779      | -1189.8648          | -1189.9193                   |
| <b>TS8a</b>    | -1189.8764      | -1189.8636          | -1189.9172                   |
| <b>PC8a</b>    | -1189.8878      | -1189.8733          | -1189.9308                   |
| <b>P8a</b>     | -729.0912       | -729.0799           | -729.1289                    |
| <b>CR8c</b>    | -1189.8763      | -1189.8635          | -1189.9177                   |
| <b>TS8c</b>    | -1189.8790      | -1189.8664          | -1189.9208                   |
| <b>PC8c</b>    | -1189.8811      | -1189.8671          | -1189.9245                   |
| <b>P8c</b>     | -729.0858       | -729.0748           | -729.1229                    |
| <b>HCl</b>     | -460.7896       | -460.7863           | -460.8075                    |

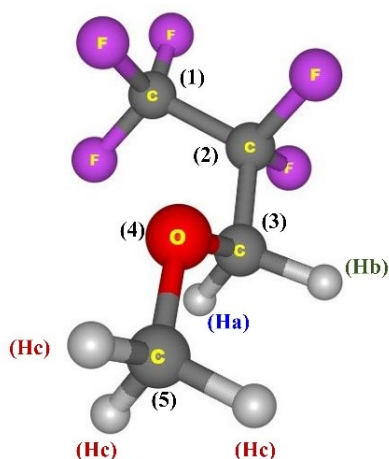

**Fig:** Optimized structure of the conformer A2 at the M06-2X/6-311++G(d,p) level.

**Notes S1:** Exception for the reaction of conformer A2 with Cl atoms.

For the conformer A2, the two hydrogens attached to C-3 are not equivalent, as also observed from the reaction of A2 with the OH radical. Thus, there should be two different transition states (TS). However, for the reaction of A2 with Cl, we were able to obtain only one TS that involves the abstraction of Ha (Pathway R6a) at the M06-2X level of theory. And despite extensive attempts, we were unable to obtain the TS corresponding to the abstraction of Hb (Pathway R6b) using any DFT-based method. Consequently, the MP2 level of theory was employed to locate the TS for Pathway R6b.

To ensure the use of the MP2 level is justified, we performed a comparative analysis between the M06-2X and MP2 level of theory for the analogous pathway R6a. We computed the total electronic energies at both levels of theory, as well as their corresponding CCSD(T) single-point energies [CCSD(T)/M06-2X and CCSD(T)/MP2], shown in Table S4. The comparison of the CCSD(T) energies obtained from both methods showed that the energy differences for all the species involved in Pathway R6a are less than 1 kcal/mol. This close agreement validates the use of MP2 for pathway R6b. The comparison data (Table S4), as well as the energies of all the species at the MP2 level of theory for pathway R6b, have been calculated below.

**Table S4:** Energy comparison of the species involved in Pathway R6a and corresponding single point energies at the M06-2X/6-311++G(d,p) and MP2/6-311++G(d,p) level of theory, that have been used for the preparation of energy profiles.

| Species     | M06-2X<br>(Hartree) | CCSD(T)/M06-2X<br>(Hartree) | MP2<br>(Hartree) | CCSD(T)/MP2<br>(Hartree) | $\Delta$ CCSD(T)<br>(kcal/mol) |
|-------------|---------------------|-----------------------------|------------------|--------------------------|--------------------------------|
| <b>CR6a</b> | -1189.878448        | -1188.13956                 | -1187.929733     | -1188.1402               | <b>0.412</b>                   |
| <b>TS6a</b> | -1189.877621        | -1188.126721                | -1187.922243     | -1188.1275               | <b>0.550</b>                   |
| <b>PC6a</b> | -1189.887346        | -1188.139683                | -1187.93695      | -1188.1406               | <b>0.628</b>                   |
| <b>P6a</b>  | -729.176822         | -727.868454                 | 727.6926         | -727.8684                | <b>0.020</b>                   |

The energy difference between the CCSD(T) energies are less than 1 kcal/mol, thus for the pathway R6b, we have used the corresponding CCSD(T) energies for preparing the energy profile diagram. These energies have been included in Table S5.

**Table S5:** Corrected zero-point energies (EE+ZPE), enthalpies (H), and Gibbs free energies (G) of the species computed at the MP2/6-311++G(d,p) level for the reaction pathway **R6b**. All energies are in Hartree.

| Species     | EE + ZPE     | Enthalpy (H) | Gibbs Free Energy (G) |
|-------------|--------------|--------------|-----------------------|
| <b>CR6b</b> | -1187.930392 | -1187.917145 | -1187.972535          |
| <b>TS6b</b> | -1187.922401 | -1187.909695 | -1187.9632            |
| <b>PC6b</b> | -1187.938493 | -1187.94043  | -1187.98239           |
| <b>P6b</b>  | -727.692982  | -727.681862  | -727.730197           |

### **Kinetics for Pathway 6b**

For the reaction of conformer A2 with  $\cdot\text{OH}$  having pathways R2a and R2b, the corresponding rate coefficients ( $k_{2a}$  and  $k_{2b}$ ) were  $(4.210 \times 10^{-14})$  and  $(4.312 \times 10^{-14})$   $\text{cm}^3 \text{ molecule}^{-1} \text{ s}^{-1}$ , respectively, at 298 K. This difference between the rate coefficients,  $k_{2a}$  and  $k_{2b}$ , can be considered negligible. Thus, for the reaction of A2 with Cl, we have considered the rate coefficient of  $k_{6a}$  and  $k_{6b}$  to be the same.

$$k_{6a} = k_{6b} = 2.1724 \times 10^{-13} \text{ cm}^3 \text{ molecule}^{-1} \text{ s}^{-1}$$

**Table S6:** The enthalpy change ( $\Delta H$ ) and Gibbs free energy change ( $\Delta G$ ) for the reaction pathways **R1-R8**.

| Pathway    | $\Delta H$ | $\Delta G$ |
|------------|------------|------------|
| <b>R1a</b> | -20.32     | -21.69     |
| <b>R1b</b> | -21.57     | -24.32     |
| <b>R1c</b> | -19.06     | -21.02     |
| <b>R2a</b> | -22.08     | -24.19     |
| <b>R2b</b> | -21.95     | -24.36     |
| <b>R2c</b> | -19.16     | -20.81     |
| <b>R3a</b> | -22.45     | -24.81     |
| <b>R3b</b> | -21.95     | -23.30     |
| <b>R3c</b> | -19.49     | -21.35     |
| <b>R4a</b> | -22.52     | -24.45     |
| <b>R4c</b> | -19.36     | -20.97     |
| <b>R5a</b> | -4.76      | -6.96      |
| <b>R5b</b> | -5.88      | -9.73      |
| <b>R5c</b> | -3.51      | -6.28      |
| <b>R6a</b> | -6.53      | -9.45      |
| <b>R6c</b> | -3.61      | -6.08      |
| <b>R7a</b> | -6.89      | -10.02     |
| <b>R7b</b> | -6.39      | -8.57      |
| <b>R7c</b> | -3.99      | -6.39      |
| <b>R8a</b> | -6.98      | -9.88      |
| <b>R8c</b> | -3.78      | -6.12      |

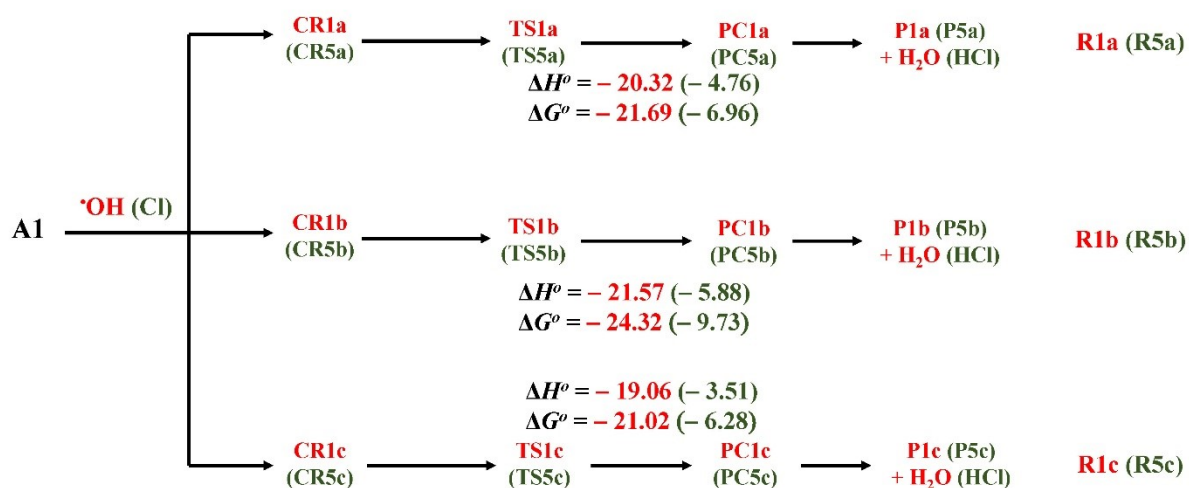

**Scheme S1:** Reaction pathways of conformer A1 with OH and Cl, including the enthalpies and Gibbs free energy changes ( $\Delta H^0$  and  $\Delta G^0$ ). Calculations are at the M06-2X/6-311++G(d,p) level of theory at 298 K and energies are in kcal/mol.

-

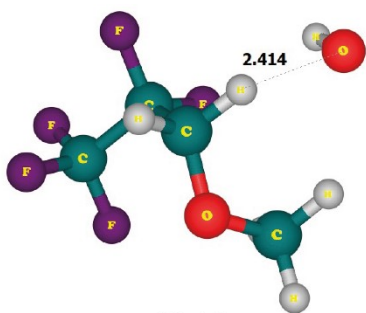

CR1a

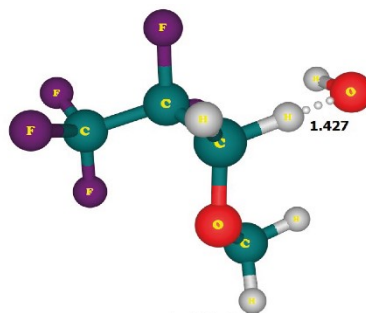

TS1a

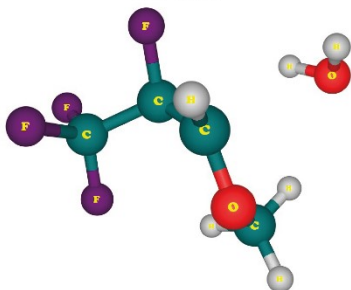

PC1a

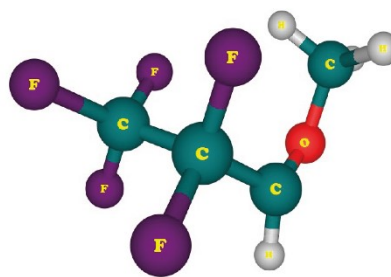

P1a

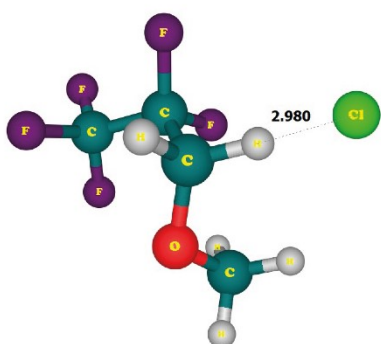

CR5a

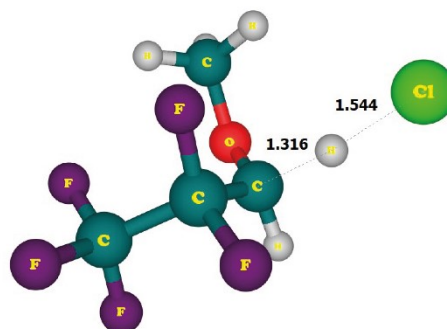

TS5a

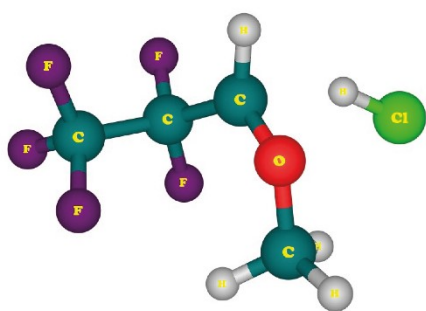

PC5a

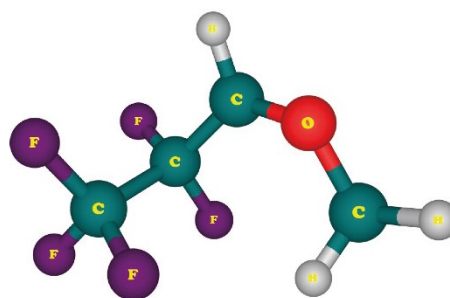

P5a

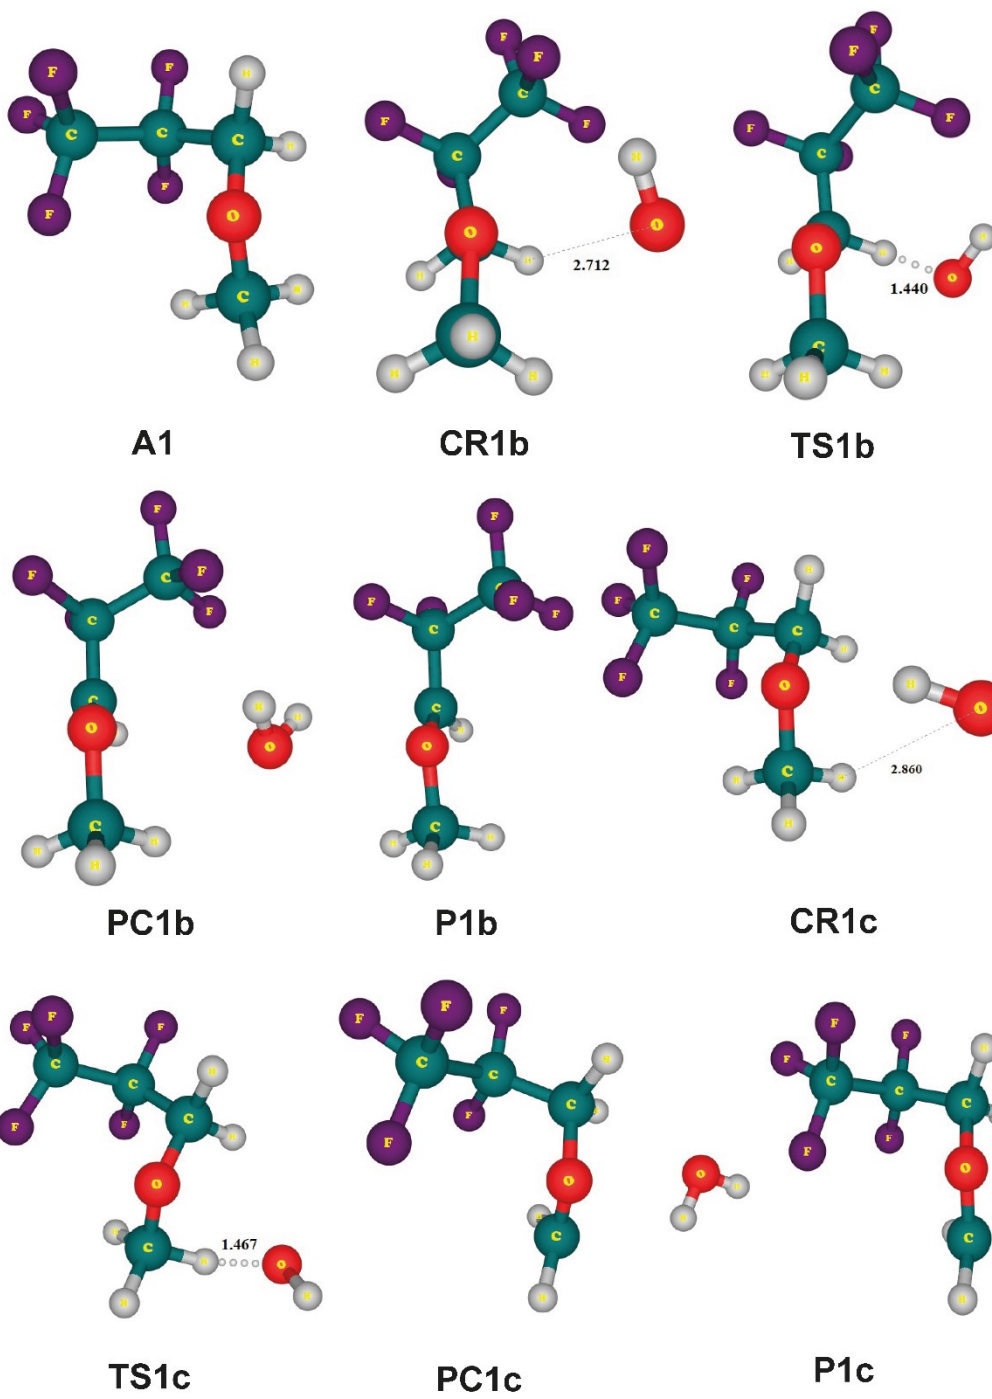

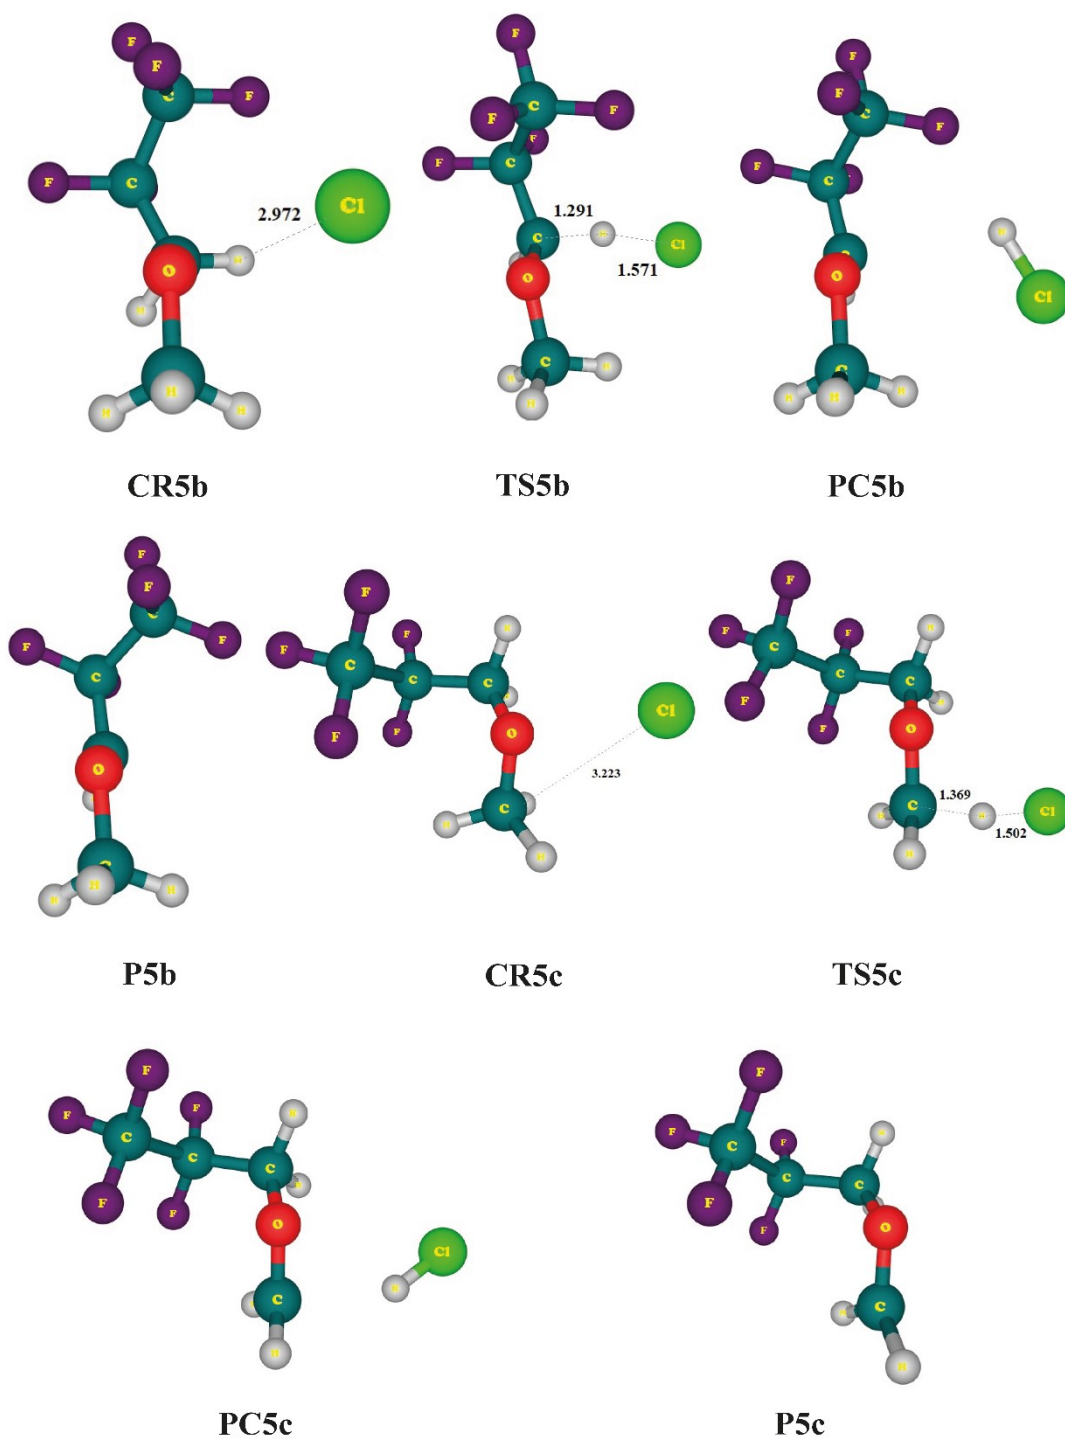

**Figure S1:** Optimized structure of the species involved in the reaction pathways, **R1** and **R5** at the M06-2X/6-311++G(d,p) level of theory.

**Table S7:** Zero-point and SOC corrected relative energies of the species involved in the pathways R1 and R5 at the CCSD(T)//M06-2X/6-311++G(d,p) level of theory along with the relative energies (RE).

| Pathways  | Species          | RE<br>(kcal/mol) | Pathways  | Species         | RE<br>(kcal/mol) |
|-----------|------------------|------------------|-----------|-----------------|------------------|
| Reactants | A1               | 0.00             | Reactants | A1              | 0.00             |
|           | OH <sup>†</sup>  |                  |           | Cl <sup>†</sup> |                  |
| R1a       | CR1a             | -2.3             | R5a       | CR5a            | -4.5             |
|           | TS1a             | 2.2              |           | TS5a            | 0.2              |
|           | PC1a             | -21.0            |           | PC5a            | -4.9             |
|           | P1a              | -18.3            |           | P5a             | -2.5             |
|           | H <sub>2</sub> O |                  |           | HCl             |                  |
| R1b       | CR1b             | -3.3             | R5b       | CR5b            | -4.0             |
|           | TS1b             | 1.0              |           | TS5b            | -0.6             |
|           | PC1b             | -24.5            |           | PC5b            | -8.1             |
|           | P1b              | -20.8            |           | P5b             | -4.7             |
|           | H <sub>2</sub> O |                  |           | HCl             |                  |
| R1c       | CR1c             | -3.2             | R5c       | CR5c            | -4.4             |
|           | TS1c             | 2.3              |           | TS5c            | -1.3             |
|           | PC1c             | -21.5            |           | PC5c            | -5.4             |
|           | P1c              | -18.3            |           | P5c             | -2.4             |
|           | H <sub>2</sub> O |                  |           | HCl             |                  |

† : SOC are considered for <sup>•</sup>OH and Cl

Figure 4 of the manuscript have been constructed using this table. More details on these energies can be found in the subsequent tables of S8.

Notes S2: Natural Bond Orbital (NBO) Analysis.

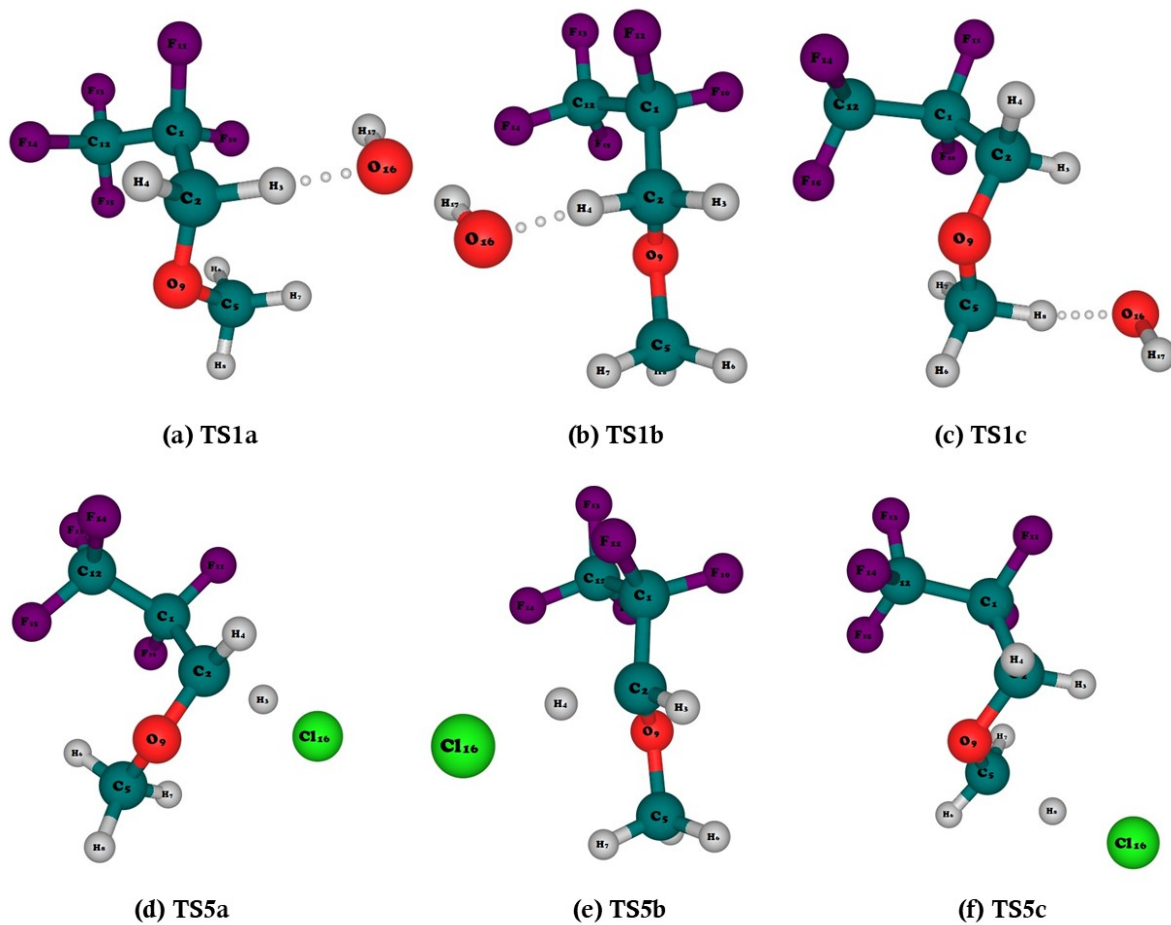

Structures of the transition states, TS1a, TS1b, TS1c, TS5a, TS5b, and TS5c of the pathways R1a, R1b, R1c, R5a, R5b, and R5c, respectively, showing the numbering of the atoms.

Details of the donor-acceptor NBO and second-order perturbation stabilization energies  $E^{(2)}$  (kcal/mol) of the TS involved in the reaction pathways R1 and R5 optimized at the M06-2X/6-311++G(d,p) level of theory.

| Pathway    | Species | Interactions                             | $E^{(2)}$ (kcal/mol) |
|------------|---------|------------------------------------------|----------------------|
| <b>R1a</b> | TS1a    | $LP_{O16} \rightarrow \sigma^*_{C2-H3}$  | 33.97                |
| <b>R1b</b> | TS1b    | $LP_{O16} \rightarrow \sigma^*_{C2-H4}$  | 32.04                |
| <b>R1c</b> | TS1c    | $LP_{O16} \rightarrow \sigma^*_{C5-H8}$  | 27.29                |
| <b>R5a</b> | TS5a    | $LP_{Cl16} \rightarrow \sigma^*_{C2-H3}$ | 86.66                |
| <b>R5b</b> | TS5b    | $LP_{Cl16} \rightarrow \sigma^*_{C2-H4}$ | 75.35                |
| <b>R5c</b> | TS5c    | $LP_{Cl16} \rightarrow \sigma^*_{C5-H8}$ | 102.84               |

For reaction with  $\cdot OH$ , R1a and R1b are predominant pathways, i.e., abstraction of H-atom from the methylene carbon atom, as evident from greater donor-acceptor interaction energy,  $E^{(2)}$ . In contrast, for the reaction with the Cl atom, R5c is the predominant pathway, i.e., abstraction of the H-atom from the methoxy carbon atom, evident from greater  $E^{(2)}$ .

**Table S8:** Single point and relative energies of all the species involved in the reaction pathways **R1-R8** at the CCSD(T)//M06-2X/6-311++G(d,p) level of theory with zero-point energy corrections (ZPE) and spin-orbit coupling corrections (SOC) for the reaction of HFE-365mcf3 with OH and Cl atoms.

| <i>R1</i>             |                                                              |                          |                                |                                     |
|-----------------------|--------------------------------------------------------------|--------------------------|--------------------------------|-------------------------------------|
| <i>Species</i>        | <i>Zero-point Energy Correction (ZPE) [M06-2X] (Hartree)</i> | <i>CCSD(T) (Hartree)</i> | <i>CCSD(T) + ZPE (Hartree)</i> | <i>Relative Energies (kcal/mol)</i> |
| <b>A1</b>             | 0.0998                                                       | -728.5269                | -728.4271                      | 0.00                                |
| <b>OH</b>             | 0.0086                                                       | -75.5965                 | -75.5878                       |                                     |
| <b>CR1a</b>           | 0.1100                                                       | -804.1286                | -804.0185                      | -2.3174                             |
| <b>TS1a</b>           | 0.1066                                                       | -804.1180                | -804.0114                      | 2.1837                              |
| <b>PC1a</b>           | 0.1097                                                       | -804.1581                | -804.0483                      | -21.0056                            |
| <b>P1a</b>            | 0.0862                                                       | -727.8655                | -727.7792                      | -18.3511                            |
| <b>CR1b</b>           | 0.1105                                                       | -804.1306                | -804.0201                      | -3.2719                             |
| <b>TS1b</b>           | 0.1063                                                       | -804.1195                | -804.0132                      | 1.0367                              |
| <b>PC1b</b>           | 0.1097                                                       | -804.1637                | -804.0540                      | -24.5561                            |
| <b>P1b</b>            | 0.0854                                                       | -727.8685                | -727.7831                      | -20.7922                            |
| <b>CR1c</b>           | 0.1107                                                       | -804.1307                | -804.0200                      | -3.2324                             |
| <b>TS1c</b>           | 0.1069                                                       | -804.1182                | -804.0112                      | 2.3155                              |
| <b>PC1c</b>           | 0.1091                                                       | -804.1583                | -804.0492                      | -21.5277                            |
| <b>P1c</b>            | 0.0853                                                       | -727.8645                | -727.7791                      | -18.2997                            |
| <b>H<sub>2</sub>O</b> | 0.0216                                                       | -76.2865                 | -76.2649                       |                                     |

| <b>R2</b>             |                                                              |                          |                                |                                     |
|-----------------------|--------------------------------------------------------------|--------------------------|--------------------------------|-------------------------------------|
| <b>Species</b>        | <b>Zero-point Energy Correction (ZPE) [M06-2X] (Hartree)</b> | <b>CCSD(T) (Hartree)</b> | <b>CCSD(T) + ZPE (Hartree)</b> | <b>Relative Energies (kcal/mol)</b> |
| <b>A2</b>             | 0.0994                                                       | -728.5270                | -728.4275                      | 0.0                                 |
| <b>OH</b>             | 0.0086                                                       | -75.5965                 | -75.5878                       |                                     |
| <b>CR2a</b>           | 0.1103                                                       | -804.1306                | -804.0202                      | -3.1                                |
| <b>TS2a</b>           | 0.1062                                                       | -804.1195                | -804.0132                      | 1.3                                 |
| <b>PC2a</b>           | 0.1096                                                       | -804.1637                | -804.0540                      | -24.3                               |
| <b>P2a</b>            | 0.0853                                                       | -727.8684                | -727.7831                      | -20.5                               |
| <b>CR2b</b>           | 0.1105                                                       | -804.1314                | -804.0209                      | -3.5                                |
| <b>TS2b</b>           | 0.1066                                                       | -804.1199                | -804.0133                      | 1.2                                 |
| <b>PC2b</b>           | 0.1096                                                       | -804.1639                | -804.0543                      | -24.4                               |
| <b>P2b</b>            | 0.0852                                                       | -727.8679                | -727.7827                      | -20.2                               |
| <b>CR2c</b>           | 0.1092                                                       | -804.1247                | -804.0155                      | -0.1                                |
| <b>TS2c</b>           | 0.1065                                                       | -804.1174                | -804.0108                      | 2.9                                 |
| <b>PC2c</b>           | 0.1094                                                       | -804.1590                | -804.0496                      | -21.5                               |
| <b>P2c</b>            | 0.0852                                                       | -727.8647                | -727.7795                      | -18.2                               |
| <b>H<sub>2</sub>O</b> | 0.0216                                                       | -76.2865                 | -76.2649                       |                                     |

| <i>R3</i>             |                                                              |                          |                                |                                     |
|-----------------------|--------------------------------------------------------------|--------------------------|--------------------------------|-------------------------------------|
| <i>Species</i>        | <i>Zero-point Energy Correction (ZPE) [M06-2X] (Hartree)</i> | <i>CCSD(T) (Hartree)</i> | <i>CCSD(T) + ZPE (Hartree)</i> | <i>Relative Energies (kcal/mol)</i> |
| <b>A3</b>             | 0.09973                                                      | -728.5253                | -728.4256                      | 0.00                                |
| <b>OH</b>             | 0.00863                                                      | -75.5964                 | -75.58783                      |                                     |
| <b>CR3a</b>           | 0.11024                                                      | -804.1307                | -804.0205                      | -4.4                                |
| <b>TS3a</b>           | 0.10637                                                      | -804.1181                | -804.0117                      | 1.1                                 |
| <b>PC3a</b>           | 0.10948                                                      | -804.1638                | -804.0543                      | -25.7                               |
| <b>P3a</b>            | 0.08531                                                      | -727.8676                | -727.7823                      | -21.2                               |
| <b>CR3b</b>           | 0.11027                                                      | -804.1270                | -804.0167                      | -2.1                                |
| <b>TS3b</b>           | 0.10668                                                      | -804.1168                | -804.0101                      | 2.1                                 |
| <b>PC3b</b>           | 0.10982                                                      | -804.1583                | -804.0485                      | -22.0                               |
| <b>P3b</b>            | 0.08591                                                      | -727.8655                | -727.7796                      | -19.5                               |
| <b>CR3c</b>           | 0.11028                                                      | -804.1297                | -804.0194                      | -3.8                                |
| <b>TS3c</b>           | 0.10638                                                      | -804.1160                | -804.0096                      | 2.4                                 |
| <b>PC3c</b>           | 0.10981                                                      | -804.1579                | -804.0480                      | -21.7                               |
| <b>P3c</b>            | 0.08527                                                      | -727.8635                | -727.7782                      | -18.7                               |
| <b>H<sub>2</sub>O</b> | 0.02161                                                      | -76.2865                 | -76.2649                       |                                     |

| <i>R4</i>             |                                                              |                          |                                |                                     |
|-----------------------|--------------------------------------------------------------|--------------------------|--------------------------------|-------------------------------------|
| <i>Species</i>        | <i>Zero-point Energy Correction (ZPE) [M06-2X] (Hartree)</i> | <i>CCSD(T) (Hartree)</i> | <i>CCSD(T) + ZPE (Hartree)</i> | <i>Relative Energies (kcal/mol)</i> |
| <b>A4</b>             | 0.0993                                                       | -728.5259                | -728.4266                      | 0.00                                |
| <b>OH</b>             | 0.0086                                                       | -75.5965                 | -75.5878                       |                                     |
| <b>CR4a</b>           | 0.1104                                                       | -804.1307                | -804.0203                      | -3.7                                |
| <b>TS4a</b>           | 0.1063                                                       | -804.1182                | -804.0118                      | 1.6                                 |
| <b>PC4a</b>           | 0.1096                                                       | -804.1639                | -804.0542                      | -25.0                               |
| <b>P4a</b>            | 0.0854                                                       | -727.8677                | -727.7823                      | -20.6                               |
| <b>CR4c</b>           | 0.1099                                                       | -804.1308                | -804.0209                      | -4.0                                |
| <b>TS4c</b>           | 0.1067                                                       | -804.1180                | -804.0113                      | 2.0                                 |
| <b>PC4c</b>           | 0.1095                                                       | -804.1585                | -804.0491                      | -21.8                               |
| <b>P4c</b>            | 0.0851                                                       | -727.8640                | -727.7789                      | -18.4                               |
| <b>H<sub>2</sub>O</b> | 0.0216                                                       | -76.2865                 | -76.2649                       |                                     |

| <b>R5</b>      |                                                              |                          |                                |                                     |
|----------------|--------------------------------------------------------------|--------------------------|--------------------------------|-------------------------------------|
| <b>Species</b> | <b>Zero-point Energy Correction (ZPE) [M06-2X] (Hartree)</b> | <b>CCSD(T) (Hartree)</b> | <b>CCSD(T) + ZPE (Hartree)</b> | <b>Relative Energies (kcal/mol)</b> |
| <b>A1</b>      | 0.0998                                                       | -728.5269                | -728.4271                      | 0.00                                |
| <b>Cl*</b>     | 0.0013                                                       | -459.6044                | -459.6058                      |                                     |
| <b>CR5a</b>    | 0.0960                                                       | -1188.1359               | -1188.0399                     | -4.4666                             |
| <b>TS5a</b>    | 0.0933                                                       | -1188.1258               | -1188.0325                     | 0.2284                              |
| <b>PC5a</b>    | 0.0950                                                       | -1188.1358               | -1188.0452                     | -4.9875                             |
| <b>P5a</b>     | 0.0862                                                       | -727.8655                | -727.7792                      | -2.4925                             |
| <b>CR5b</b>    | 0.1003                                                       | -1188.1396               | -1188.0393                     | -4.0469                             |
| <b>TS5b</b>    | 0.0930                                                       | -1188.1267               | -1188.0337                     | -0.5761                             |
| <b>PC5b</b>    | 0.0939                                                       | -1188.1397               | -1188.0458                     | -8.1389                             |
| <b>P5b</b>     | 0.0853                                                       | -727.8679                | -727.7827                      | -4.6506                             |
| <b>HCl</b>     | 0.0068                                                       | -460.2644                | -460.2576                      |                                     |
| <b>CR5c</b>    | 0.1006                                                       | -1188.1404               | -1188.0398                     | -4.3675                             |
| <b>TS5c</b>    | 0.0933                                                       | -1188.1282               | -1188.0349                     | -1.3176                             |
| <b>PC5c</b>    | 0.0944                                                       | -1188.1358               | -1188.0415                     | -5.4249                             |
| <b>P5c</b>     | 0.0853                                                       | -727.8645                | -727.7791                      | -2.4160                             |
| <b>HCl</b>     | 0.0068                                                       | -460.2644                | -460.2576                      |                                     |

\*: Spin-orbit coupling correction incorporated for Cl atoms [1].

## **Reference**

[1] National Institute of Standards and Technology. *Computational Chemistry Comparison and Benchmark Database (CCCBDB) – Electronic Spin Splitting Corrections*. Standard Reference Database 101, Release 22 (May 2022). <https://cccbdb.nist.gov/electspinx.asp> (accessed Oct 21, 2025).

| <b>R6</b>      |                                                              |                          |                                |                                     |
|----------------|--------------------------------------------------------------|--------------------------|--------------------------------|-------------------------------------|
| <i>Species</i> | <i>Zero-point Energy Correction (ZPE) [M06-2X] (Hartree)</i> | <i>CCSD(T) (Hartree)</i> | <i>CCSD(T) + ZPE (Hartree)</i> | <i>Relative Energies (kcal/mol)</i> |
| <b>A2</b>      | 0.0994                                                       | -728.5270                | -728.4275                      | 0.00                                |
| <b>Cl*</b>     | 0.0013*                                                      | -459.6044*               | -459.6058*                     |                                     |
| <b>CR6a</b>    | 0.1004                                                       | -1188.1396               | -1188.0392                     | -3.6                                |
| <b>TS6a</b>    | 0.0930                                                       | -1188.1267               | -1188.0338                     | -0.3                                |
| <b>PC6a</b>    | 0.0933                                                       | -1188.1397               | -1188.0464                     | -8.2                                |
| <b>P6a</b>     | 0.0854                                                       | -727.8685                | -727.7831                      | -4.6                                |
| <b>CR6b†</b>   | 0.1000                                                       | -1188.1406               | -1188.0405                     | -4.5                                |
| <b>TS6b†</b>   | 0.0940                                                       | -1188.1281               | -1188.0341                     | -0.5                                |
| <b>PC6b†</b>   | 0.0943                                                       | -1188.1423               | -1188.0480                     | -9.2                                |
| <b>P6b†</b>    | 0.0856                                                       | -727.8689                | -727.7832                      | -4.7                                |
| <b>CR6c</b>    | 0.1002                                                       | -1188.1401               | -1188.0398                     | -4.1                                |
| <b>TS6c</b>    | 0.0928                                                       | -1188.1280               | -1188.0352                     | -1.1                                |
| <b>PC6c</b>    | 0.0945                                                       | -1188.1357               | -1188.0411                     | -4.8                                |
| <b>P6c</b>     | 0.0852                                                       | -727.8647                | -727.7795                      | -2.4                                |
| <b>HCl</b>     | 0.0068                                                       | -460.2644                | -460.2576                      |                                     |

\*: Spin-orbit coupling correction incorporated for Cl atoms, †: Calculation at the MP2/6-311++G(d,p) level of theory.

| <i>R7</i>      |                                                              |                          |                                |                                     |
|----------------|--------------------------------------------------------------|--------------------------|--------------------------------|-------------------------------------|
| <i>Species</i> | <i>Zero-point Energy Correction (ZPE) [M06-2X] (Hartree)</i> | <i>CCSD(T) (Hartree)</i> | <i>CCSD(T) + ZPE (Hartree)</i> | <i>Relative Energies (kcal/mol)</i> |
| <b>A3</b>      | 0.0997                                                       | -728.5254                | -728.4256                      | 0.00                                |
| <b>Cl*</b>     | 0.0013*                                                      | -459.6044                | -459.6058                      |                                     |
| <b>CR7a</b>    | 0.10024                                                      | -1188.1389               | -1188.0387                     | -4.6                                |
| <b>TS7a</b>    | 0.09316                                                      | -1188.1258               | -1188.0327                     | -0.8                                |
| <b>PC7a</b>    | 0.09397                                                      | -1188.1405               | -1188.0411                     | -9.5                                |
| <b>P7a</b>     | 0.08535                                                      | -727.8676                | -727.7823                      | -5.3                                |
| <b>CR7b</b>    | 0.1000                                                       | -1188.1346               | -1188.0346                     | -2.0                                |
| <b>TS7b</b>    | 0.0977                                                       | -1188.1281               | -1188.0304                     | 0.7                                 |
| <b>PC7b</b>    | 0.0938                                                       | -1188.1362               | -1188.0424                     | -6.9                                |
| <b>P7b</b>     | 0.0859                                                       | -727.8656                | -727.7797                      | -3.7                                |
| <b>CR7c</b>    | 0.1005                                                       | -1188.1387               | -1188.0382                     | -4.3                                |
| <b>TS7c</b>    | 0.0932                                                       | -1188.1277               | -1188.0345                     | -1.9                                |
| <b>PC7c</b>    | 0.0940                                                       | -1188.1351               | -1188.0411                     | -6.1                                |
| <b>P7c</b>     | 0.0853                                                       | -727.8638                | -727.7785                      | -2.9                                |
| <b>HCl</b>     | 0.0068                                                       | -460.2644                | -460.2576                      |                                     |

\*: Spin-orbit coupling correction incorporated for Cl atoms.

| <b>R8</b>      |                                                              |                          |                                |                                     |
|----------------|--------------------------------------------------------------|--------------------------|--------------------------------|-------------------------------------|
| <b>Species</b> | <b>Zero-point Energy Correction (ZPE) [M06-2X] (Hartree)</b> | <b>CCSD(T) (Hartree)</b> | <b>CCSD(T) + ZPE (Hartree)</b> | <b>Relative Energies (kcal/mol)</b> |
| <b>A4</b>      | 0.0993                                                       | -728.5259                | -728.4266                      | 0.0                                 |
| <b>Cl*</b>     | 0.0013                                                       | -459.6044                | -459.6058                      |                                     |
| <b>CR8a</b>    | 0.1002                                                       | -1188.1390               | -1188.0387                     | -4.0                                |
| <b>TS8a</b>    | 0.0933                                                       | -1188.1259               | -1188.0326                     | -0.1                                |
| <b>PC8a</b>    | 0.0939                                                       | -1188.1406               | -1188.0467                     | -9.0                                |
| <b>P8a</b>     | 0.0853                                                       | -727.8677                | -727.7824                      | -4.8                                |
| <b>CR8c</b>    | 0.1002                                                       | -1188.1390               | -1188.0387                     | -4.0                                |
| <b>TS8c</b>    | 0.0927                                                       | -1188.1276               | -1188.0349                     | -1.6                                |
| <b>PC8c</b>    | 0.0939                                                       | -1188.1353               | -1188.0414                     | -5.6                                |
| <b>P8c</b>     | 0.0852                                                       | -727.8640                | -727.7788                      | -2.5                                |
| <b>HCl</b>     | 0.0068                                                       | -460.2644                | -460.2576                      |                                     |

\*: Spin-orbit coupling correction incorporated for Cl atoms.

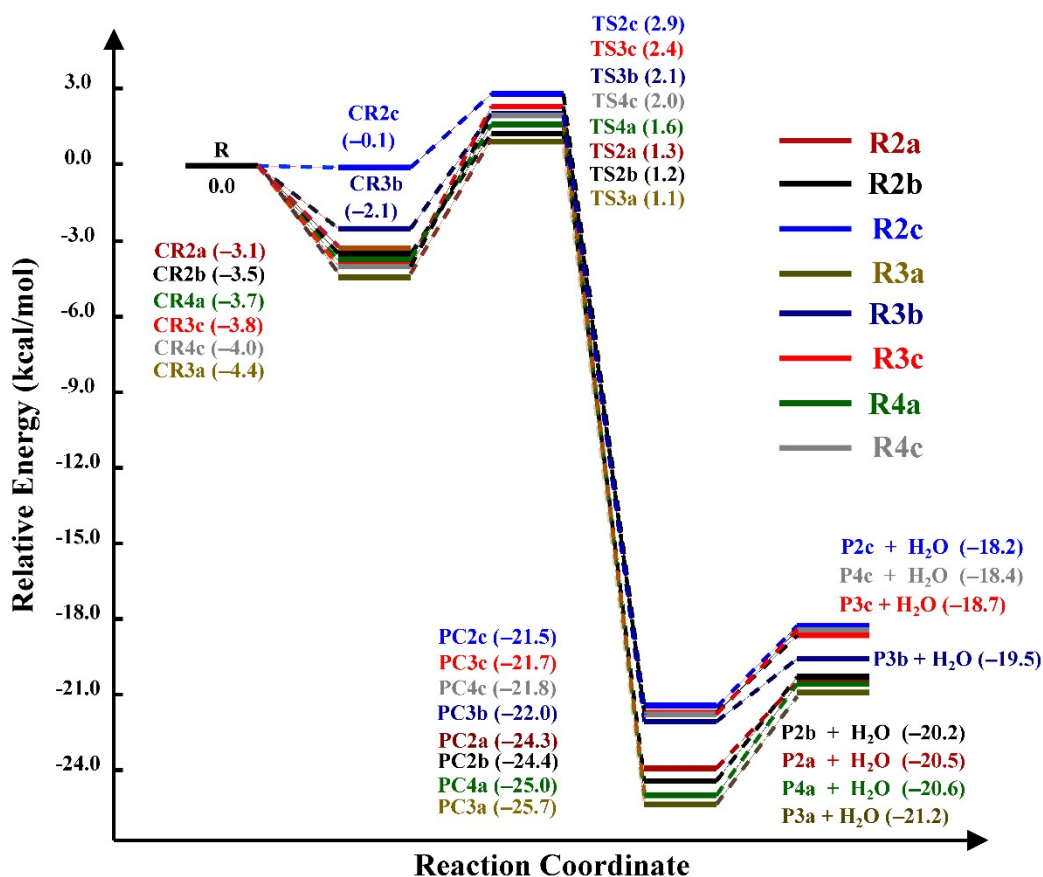

**Figure S2:** Relative energy profile diagram for the reaction pathways **R2-R4** at the CCSD(T)/6-311++G(d,p)//M06-2X/6-311++G(d,p) level of theory with zero-point energy corrections and spin-orbit coupling corrections. Energies are in kcal/mol.

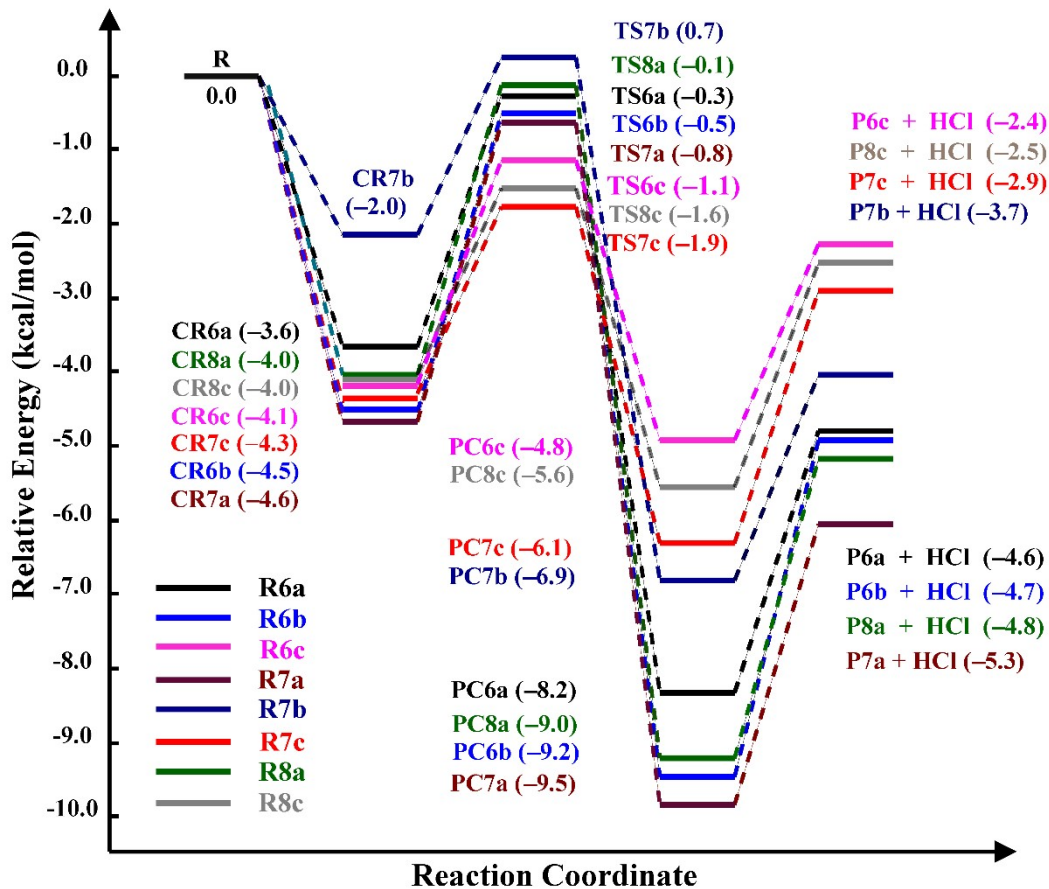

**Figure S3:** Relative energy profile diagram for the reaction pathways **R6-R8** at the CCSD(T)/6-311++G(d,p)//M06-2X/6-311++G(d,p) level of theory with zero-point energy corrections and spin-orbit coupling corrections. Energies are in kcal/mol.

**Table S9:** *T1*-diagnostic and spin-contamination  $\langle S^2 \rangle$  values of all the stationary points that are involved in the reaction of HFE-365mcf3 with  $\cdot\text{OH}$  and Cl atoms (reaction pathways **R1-**

| <i>R1</i>      |                       |                       |
|----------------|-----------------------|-----------------------|
| <i>Species</i> | <i>T1-Diagnostics</i> | $\langle S^2 \rangle$ |
| <b>A1</b>      | 0.0126                | 0.0000                |
| <b>OH</b>      | 0.0101                | 0.7500                |
| <b>CR1a</b>    | 0.01317               | 0.7500                |
| <b>TS1a</b>    | 0.0177                | 0.7502                |
| <b>PC1a</b>    | 0.01494               | 0.7501                |
| <b>P1a</b>     | 0.01509               | 0.7501                |
| <b>CR1b</b>    | 0.0132                | 0.7500                |
| <b>TS1b</b>    | 0.0176                | 0.7502                |
| <b>PC1b</b>    | 0.0147                | 0.7501                |
| <b>P1b</b>     | 0.0150                | 0.7501                |
| <b>CR1c</b>    | 0.0125                | 0.7500                |
| <b>TS1c</b>    | 0.0172                | 0.7502                |
| <b>PC1c</b>    | 0.0143                | 0.7501                |
| <b>P1c</b>     | 0.0144                | 0.7501                |

**R8**), calculated at the CCSD(T)/6-311++G(d,p) level of theory.

|                       |                              |                                     |
|-----------------------|------------------------------|-------------------------------------|
| <b>H<sub>2</sub>O</b> | 0.0104                       | 0.0000                              |
| <b>R2</b>             |                              |                                     |
| <b><i>Species</i></b> | <b><i>T1-Diagnostics</i></b> | <b><i>&lt;S<sup>2</sup>&gt;</i></b> |
| <b>A2</b>             | 0.0125                       | 0.0000                              |
| <b>OH</b>             | 0.0101                       | 0.7500                              |
| <b>CR2a</b>           | 0.01319                      | 0.7500                              |
| <b>TS2a</b>           | 0.0175                       | 0.7502                              |
| <b>PC2a</b>           | 0.0147                       | 0.7501                              |
| <b>P2a</b>            | 0.01498                      | 0.7501                              |
| <b>CR2b</b>           | 0.0194                       | 0.7500                              |
| <b>TS2b</b>           | 0.0174                       | 0.7502                              |
| <b>PC2b</b>           | 0.0148                       | 0.7501                              |
| <b>P2b</b>            | 0.0150                       | 0.7501                              |
| <b>CR2c</b>           | 0.0125                       | 0.7500                              |
| <b>TS2c</b>           | 0.0174                       | 0.7502                              |
| <b>PC2c</b>           | 0.0143                       | 0.7501                              |
| <b>P2c</b>            | 0.0145                       | 0.7501                              |
| <b>H<sub>2</sub>O</b> | 0.0104                       | 0.0000                              |

| <b>R3</b>             |                              |                                         |
|-----------------------|------------------------------|-----------------------------------------|
| <b><i>Species</i></b> | <b><i>T1-Diagnostics</i></b> | <b><math>\langle S^2 \rangle</math></b> |
| <b>A3</b>             | 0.0125                       | 0.0000                                  |
| <b>OH</b>             | 0.0101                       | 0.7500                                  |
| <b>CR3a</b>           | 0.01292                      | 0.7500                                  |
| <b>TS3a</b>           | 0.01753                      | 0.7502                                  |
| <b>PC3a</b>           | 0.01485                      | 0.7501                                  |
| <b>P3a</b>            | 0.01503                      | 0.7501                                  |
| <b>CR3b</b>           | 0.0133                       | 0.7500                                  |
| <b>TS3b</b>           | 0.0178                       | 0.7502                                  |
| <b>PC3b</b>           | 0.0150                       | 0.7501                                  |
| <b>P3b</b>            | 0.0152                       | 0.7500                                  |
| <b>CR3c</b>           | 0.0124                       | 0.7500                                  |
| <b>TS3c</b>           | 0.0171                       | 0.7502                                  |
| <b>PC3c</b>           | 0.0141                       | 0.7501                                  |
| <b>P3c</b>            | 0.0143                       | 0.7501                                  |
| <b>H<sub>2</sub>O</b> | 0.0104                       | 0.0000                                  |

| <i>R4</i>             |                       |                       |
|-----------------------|-----------------------|-----------------------|
| <i>Species</i>        | <i>T1-Diagnostics</i> | $\langle S^2 \rangle$ |
| <b>A4</b>             | 0.0124                | 0.0000                |
| <b>OH</b>             | 0.0101                | 0.7500                |
| <b>CR4a</b>           | 0.0129                | 0.7500                |
| <b>TS4a</b>           | 0.0175                | 0.7502                |
| <b>PC4a</b>           | 0.0148                | 0.7501                |
| <b>P4a</b>            | 0.0150                | 0.7501                |
| <b>CR4c</b>           | 0.0129                | 0.7500                |
| <b>TS4c</b>           | 0.0172                | 0.7502                |
| <b>PC4c</b>           | 0.0143                | 0.7501                |
| <b>P4c</b>            | 0.0144                | 0.7501                |
| <b>H<sub>2</sub>O</b> | 0.0104                | 0.0000                |

| <b><i>R5</i></b>      |                              |                                         |
|-----------------------|------------------------------|-----------------------------------------|
| <b><i>Species</i></b> | <b><i>T1-Diagnostics</i></b> | <b><math>\langle S^2 \rangle</math></b> |
| <b>A1</b>             | 0.0126                       | 0.0000                                  |
| <b>Cl</b>             | 0.0057                       | 0.7500                                  |
| <b>CR5a</b>           | 0.0122                       | 0.7500                                  |
| <b>TS5a</b>           | 0.0157                       | 0.7505                                  |
| <b>PC5a</b>           | 0.0146                       | 0.7501                                  |
| <b>P5a</b>            | 0.0150                       | 0.7501                                  |
| <b>CR5b</b>           | 0.0143                       | 0.7500                                  |
| <b>TS5b</b>           | 0.0158                       | 0.7505                                  |
| <b>PC5b</b>           | 0.0143                       | 0.7501                                  |
| <b>P5b</b>            | 0.0149                       | 0.7501                                  |
| <b>CR5c</b>           | 0.0145                       | 0.7502                                  |
| <b>TS5c</b>           | 0.0149                       | 0.7504                                  |
| <b>PC5c</b>           | 0.0141                       | 0.7501                                  |
| <b>P5c</b>            | 0.0144                       | 0.7501                                  |
| <b>HCl</b>            | 0.0056                       | 0                                       |

| <b>R6</b>      |                       |                       |
|----------------|-----------------------|-----------------------|
| <i>Species</i> | <i>T1-Diagnostics</i> | $\langle S^2 \rangle$ |
| <b>A2</b>      | 0.0125                | 0.0000                |
| <b>Cl</b>      | 0.0057                | 0.7500                |
| <b>CR6a</b>    | 0.0143                | 0.75                  |
| <b>TS6a</b>    | 0.0158                | 0.7505                |
| <b>PC6a</b>    | 0.0143                | 0.7501                |
| <b>P6a</b>     | 0.0149                | 0.7501                |
| <b>CR6b†</b>   | 0.0133                | 0.7500                |
| <b>TS6b†</b>   | 0.0162                | 0.7503                |
| <b>PC6b†</b>   | 0.0143                | 0.7501                |
| <b>P6b†</b>    | 0.0151                | 0.7501                |
| <b>CR6c</b>    | 0.0140                | 0.75                  |
| <b>TS6c</b>    | 0.0149                | 0.7504                |
| <b>PC6c</b>    | 0.0141                | 0.7501                |
| <b>P6c</b>     | 0.0144                | 0.7501                |
| <b>HCl</b>     | 0.0056                | 0                     |

†: Calculations at the CCSD(T)//MP2/6-311++G(d,p) level of theory.

| <b><i>R7</i></b>      |                              |                                     |
|-----------------------|------------------------------|-------------------------------------|
| <b><i>Species</i></b> | <b><i>T1-Diagnostics</i></b> | <b><i>&lt;S<sup>2</sup>&gt;</i></b> |
| <b>A3</b>             | 0.0125                       | 0.0000                              |
| <b>Cl</b>             | 0.0057                       | 0.7500                              |
| <b>CR7a</b>           | 0.0141                       | 0.7500                              |
| <b>TS7a</b>           | 0.0161                       | 0.7504                              |
| <b>PC7a</b>           | 0.0144                       | 0.7501                              |
| <b>P7a</b>            | 0.0150                       | 0.7501                              |
| <b>CR7b</b>           | 0.0123                       | 0.7500                              |
| <b>TS7b</b>           | 0.0154                       | 0.7501                              |
| <b>PC7b</b>           | 0.0146                       | 0.7500                              |
| <b>P7b</b>            | 0.0152                       | 0.7501                              |
| <b>CR7c</b>           | 0.0146                       | 0.7500                              |
| <b>TS7c</b>           | 0.0149                       | 0.7500                              |
| <b>PC7c</b>           | 0.0140                       | 0.7501                              |
| <b>P7c</b>            | 0.0144                       | 0.7500                              |
| <b>HCl</b>            | 0.0056                       | 0                                   |

| <b>R8</b>             |                              |                                         |
|-----------------------|------------------------------|-----------------------------------------|
| <b><i>Species</i></b> | <b><i>T1-Diagnostics</i></b> | <b><math>\langle S^2 \rangle</math></b> |
| <b>A4</b>             | 0.0124                       | 0.0000                                  |
| <b>Cl</b>             | 0.0057                       | 0.7500                                  |
| <b>CR8a</b>           | 0.0141                       | 0.7501                                  |
| <b>TS8a</b>           | 0.0161                       | 0.7504                                  |
| <b>PC8a</b>           | 0.0144                       | 0.7501                                  |
| <b>P8a</b>            | 0.0150                       | 0.7501                                  |
| <b>CR8c</b>           | 0.0141                       | 0.7501                                  |
| <b>TS8c</b>           | 0.0148                       | 0.7504                                  |
| <b>PC8c</b>           | 0.0140                       | 0.7501                                  |
| <b>P8c</b>            | 0.0144                       | 0.7501                                  |
| <b>HCl</b>            | 0.0056                       | 0                                       |

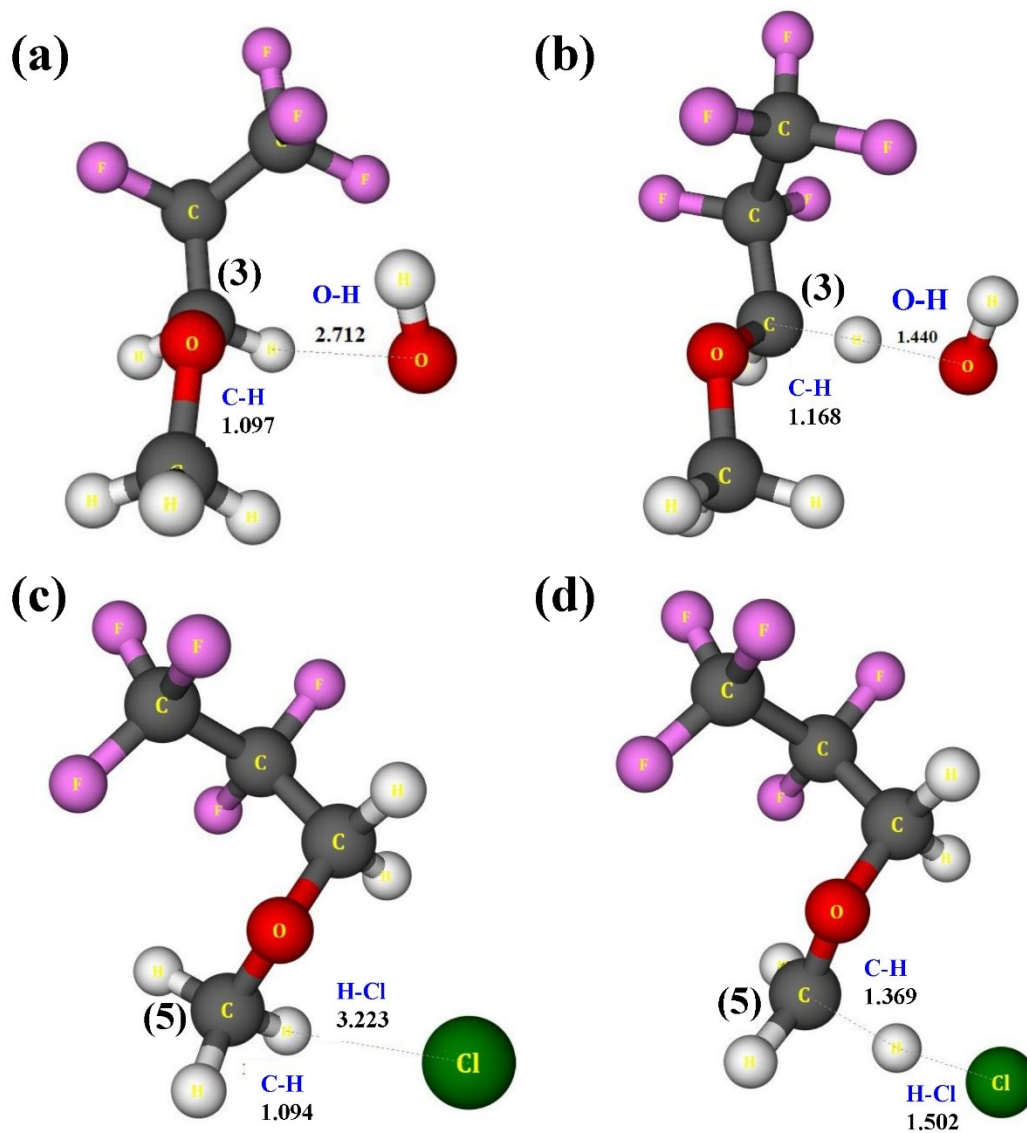

**Figure S4:** Optimized geometries of (a) CR1b and (b) TS1b for the OH-initiated pathway R1b, and (c) CR5c and (d) TS5c for the Cl-initiated pathway R5c, calculated at the M06-2X/6-311++G(d,p) level of theory. Bond lengths (in Å) corresponding to the breaking of the C–H bond and the forming of O–H or Cl–H bonds are shown.

**Notes S3: Kinetic Model Derivation.**

For the reaction

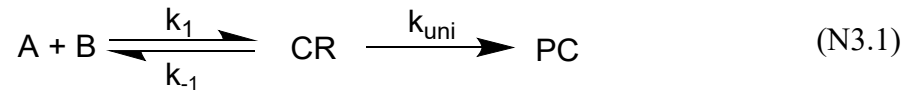

Where A and B are the reactant and atmospheric oxidant, respectively.  $k_1$  and  $k_{-1}$  are the forward and backward rate coefficients, respectively.  $k_{uni}$  is the unimolecular rate coefficient.

Applying steady-state approximation to the CR, we get

$$\frac{d[CR]}{dt} = k_1[A][B] - k_{-1}[CR] - k_{uni}[CR] \approx 0 \quad (N3.2)$$

$$[CR] = \frac{k_1[A][B]}{k_{-1} + k_{uni}} \quad (N3.3)$$

Thus, the expression for the formation of the product, PC is

$$\frac{d[PC]}{dt} = k_{uni}[CR] \quad (N3.4)$$

Substituting the value of [CR] in the above equation, we get

$$\frac{d[PC]}{dt} = k_{uni} \frac{k_1}{k_{-1} + k_{uni}} [A][B] \quad (N3.5)$$

Therefore, the composite rate coefficient is given by

$$k_o = \frac{k_1 \times k_{uni}}{k_{-1} + k_{uni}} \quad (N3.6)$$

## Reverse rate concept

The reverse rate ( $k_{-1}$ ) becomes relevant in the pre-reactive complex when the energy barrier of the back-dissociation step to the individual reactant is greater or similar to the energy barrier of the transition state.

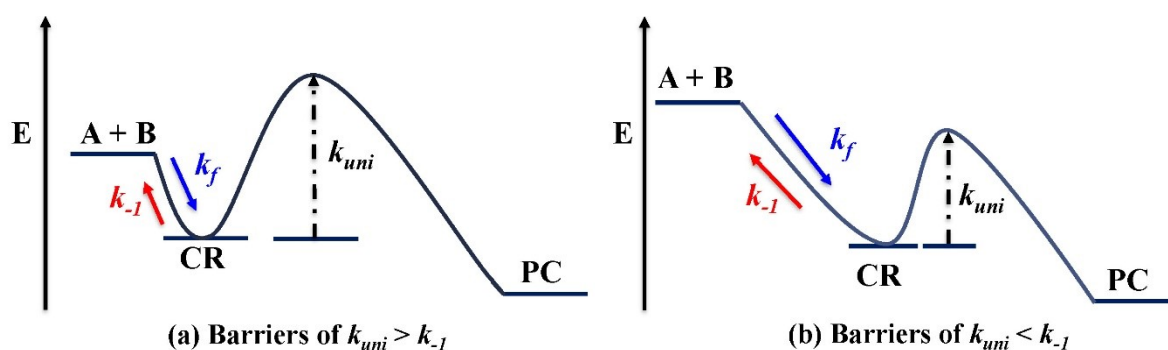

**Figure S5:** Schematic representation of the reaction pathways (a) forward energy barrier is greater than reverse energy barrier, and (b) reverse energy barrier is greater than forward energy barrier, with respect to pre-reactive complex CR.

In the case of  $\cdot\text{OH}$ , the reaction pathway Fig. S5 (a) is followed where the energy barrier of  $k_{uni}$  is greater than  $k_{-1}$ . Thus, the reverse energy barrier does not influence the kinetics here.

Again, for the Cl-initiated reactions, the consideration of reverse barrier is important and the pathway Fig. S5 (b) is mostly followed (also evident from energy profile diagrams shown in Fig. 4 of manuscript and Figs. S2 and S3 of the SI).

However, for specific pathways R5a and R7b, the reaction pathway Fig. S5 (a) is followed and similar to the reaction with  $\cdot\text{OH}$ , the reverse energy barrier does not influence the kinetics. But, for the other pathways, R5b, R5c, R6a, R6c, R7a, R7c, R8a, and R8c, the reverse energy barrier plays a more significant role. In these cases,  $k_{-1}$  were calculated variationally using the KiSThelP software, The forward rate constant  $k_f$  was then derived from the equilibrium constant relation  $K_{eq} = (k_f/k_{-1})$ . Using the calculated  $k_f$ ,  $k_{uni}$ , and  $k_{-1}$ , the overall rate coefficient was evaluated from the expression below.

$$k_o = \frac{k_1 \times k_{uni}}{k_{-1} + k_{uni}}$$

To improve the clarity, we have now revised the Supporting Information to explicitly describe the rate coefficient calculations involving high reverse energy barriers. Additionally, detailed excel sheets have been added to SI4-Kinetics.xlsx file providing data for these pathways (R5b, R5c, R6a, R6c, R7a, R7c, R8a, and R8c).

**Table S10:** Calculated equilibrium constant ( $K_{eq}$ ), unimolecular rate coefficient ( $k_{uni}$ ), and total rate coefficients ( $k_{1a}$ ) for the reaction pathway **R1a** in the temperature range 200-400 K at the M06-2X level.

| <i>R1a</i>             |                                              |                           |                                                     |
|------------------------|----------------------------------------------|---------------------------|-----------------------------------------------------|
| <i>Temperature (K)</i> | $K_{eq}$<br>( $cm^3 \text{ molecule}^{-1}$ ) | $k_{uni}$<br>( $s^{-1}$ ) | $k_{1a}$<br>( $cm^3 \text{ molecule}^{-1} s^{-1}$ ) |
| 200                    | $1.358 \times 10^{-22}$                      | $5.300 \times 10^7$       | $7.200 \times 10^{-15}$                             |
| 220                    | $5.559 \times 10^{-23}$                      | $1.000 \times 10^8$       | $5.559 \times 10^{-15}$                             |
| 240                    | $2.637 \times 10^{-23}$                      | $1.800 \times 10^8$       | $4.746 \times 10^{-15}$                             |
| 260                    | $1.401 \times 10^{-23}$                      | $3.000 \times 10^8$       | $4.204 \times 10^{-15}$                             |
| 280                    | $8.147 \times 10^{-24}$                      | $4.700 \times 10^8$       | $3.829 \times 10^{-15}$                             |
| 298                    | $5.318 \times 10^{-24}$                      | $6.800 \times 10^8$       | $3.616 \times 10^{-15}$                             |
| 300                    | $5.088 \times 10^{-24}$                      | $7.100 \times 10^8$       | $3.613 \times 10^{-15}$                             |
| 320                    | $3.369 \times 10^{-24}$                      | $1.000 \times 10^9$       | $3.369 \times 10^{-15}$                             |
| 340                    | $2.341 \times 10^{-24}$                      | $1.400 \times 10^9$       | $3.277 \times 10^{-15}$                             |
| 360                    | $1.693 \times 10^{-24}$                      | $1.900 \times 10^9$       | $3.217 \times 10^{-15}$                             |
| 380                    | $1.267 \times 10^{-24}$                      | $2.400 \times 10^9$       | $3.041 \times 10^{-15}$                             |
| 400                    | $9.757 \times 10^{-25}$                      | $3.100 \times 10^9$       | $3.025 \times 10^{-15}$                             |

**Table S11:** Calculated equilibrium constant ( $K_{eq}$ ), unimolecular rate coefficient ( $k_{uni}$ ), and total rate coefficients ( $k_{1b}$ ) for the reaction pathway **R1b** in the temperature range 200-400 K at the M06-2X level.

| <i>R1b</i>             |                                       |                           |                                               |
|------------------------|---------------------------------------|---------------------------|-----------------------------------------------|
| <i>Temperature (K)</i> | $K_{eq}$<br>( $cm^3\ molecule^{-1}$ ) | $k_{uni}$<br>( $s^{-1}$ ) | $k_{1b}$<br>( $cm^3\ molecule^{-1}\ s^{-1}$ ) |
| 200                    | $4.496 \times 10^{-22}$               | $4.800 \times 10^8$       | $2.158 \times 10^{-13}$                       |
| 220                    | $1.443 \times 10^{-22}$               | $9.600 \times 10^8$       | $1.385 \times 10^{-13}$                       |
| 240                    | $5.590 \times 10^{-23}$               | $1.800 \times 10^9$       | $1.006 \times 10^{-13}$                       |
| 260                    | $2.503 \times 10^{-23}$               | $3.100 \times 10^9$       | $7.759 \times 10^{-14}$                       |
| 280                    | $1.256 \times 10^{-23}$               | $5.000 \times 10^9$       | $6.281 \times 10^{-14}$                       |
| 298                    | $7.308 \times 10^{-24}$               | $7.300 \times 10^9$       | $5.335 \times 10^{-14}$                       |
| 300                    | $6.908 \times 10^{-24}$               | $7.600 \times 10^9$       | $5.250 \times 10^{-14}$                       |
| 320                    | $4.092 \times 10^{-24}$               | $1.100 \times 10^{10}$    | $4.501 \times 10^{-14}$                       |
| 340                    | $2.577 \times 10^{-24}$               | $1.600 \times 10^{10}$    | $4.123 \times 10^{-14}$                       |
| 360                    | $1.708 \times 10^{-24}$               | $2.100 \times 10^{10}$    | $3.587 \times 10^{-14}$                       |
| 380                    | $1.182 \times 10^{-24}$               | $2.800 \times 10^{10}$    | $3.310 \times 10^{-14}$                       |
| 400                    | $8.485 \times 10^{-25}$               | $3.600 \times 10^{10}$    | $3.054 \times 10^{-14}$                       |

**Table S12:** Calculated equilibrium constant ( $K_{eq}$ ), unimolecular rate coefficient ( $k_{uni}$ ), and total rate coefficients ( $Total\ k_{1c}$ ) for the reaction pathway **R1c** in the temperature range 200-400 K at the M06-2X level.

| <i>R1c</i>             |                                       |                           |                                               |                                                                          |
|------------------------|---------------------------------------|---------------------------|-----------------------------------------------|--------------------------------------------------------------------------|
| <i>Temperature (K)</i> | $K_{eq}$<br>( $cm^3\ molecule^{-1}$ ) | $k_{uni}$<br>( $s^{-1}$ ) | $k_{1c}$<br>( $cm^3\ molecule^{-1}\ s^{-1}$ ) | $Total\ k_{1c}$<br>( $3 * k_{1c}$ )<br>( $cm^3\ molecule^{-1}\ s^{-1}$ ) |
| 200                    | $7.948 \times 10^{-22}$               | $5.400 \times 10^6$       | $4.292 \times 10^{-15}$                       | $1.288 \times 10^{-14}$                                                  |
| 220                    | $2.917 \times 10^{-22}$               | $1.400 \times 10^7$       | $4.083 \times 10^{-15}$                       | $1.225 \times 10^{-14}$                                                  |
| 240                    | $1.263 \times 10^{-22}$               | $3.300 \times 10^7$       | $4.169 \times 10^{-15}$                       | $1.251 \times 10^{-14}$                                                  |
| 260                    | $6.218 \times 10^{-23}$               | $7.000 \times 10^7$       | $4.353 \times 10^{-15}$                       | $1.306 \times 10^{-14}$                                                  |
| 280                    | $3.384 \times 10^{-23}$               | $1.300 \times 10^8$       | $4.400 \times 10^{-15}$                       | $1.320 \times 10^{-14}$                                                  |
| 298                    | $2.098 \times 10^{-23}$               | $2.300 \times 10^8$       | $4.826 \times 10^{-15}$                       | $1.448 \times 10^{-14}$                                                  |
| 300                    | $1.997 \times 10^{-23}$               | $2.400 \times 10^8$       | $4.792 \times 10^{-15}$                       | $1.437 \times 10^{-14}$                                                  |
| 320                    | $1.258 \times 10^{-23}$               | $4.000 \times 10^8$       | $5.030 \times 10^{-15}$                       | $1.509 \times 10^{-14}$                                                  |
| 340                    | $8.361 \times 10^{-24}$               | $6.300 \times 10^8$       | $5.268 \times 10^{-15}$                       | $1.580 \times 10^{-14}$                                                  |
| 360                    | $5.815 \times 10^{-24}$               | $9.400 \times 10^8$       | $5.466 \times 10^{-15}$                       | $1.640 \times 10^{-14}$                                                  |
| 380                    | $4.202 \times 10^{-24}$               | $1.400 \times 10^9$       | $5.882 \times 10^{-15}$                       | $1.765 \times 10^{-14}$                                                  |
| 400                    | $3.135 \times 10^{-24}$               | $1.900 \times 10^9$       | $5.957 \times 10^{-15}$                       | $1.787 \times 10^{-14}$                                                  |

**Table S13:** Calculated equilibrium constant ( $K_{eq}$ ), unimolecular rate coefficient ( $k_{uni}$ ), and total rate coefficients ( $k_{2a}$ ) for the reaction pathway **R2a** in the temperature range 200-400 K at the M06-2X level.

| <i>R2a</i>             |                                      |                           |                                             |
|------------------------|--------------------------------------|---------------------------|---------------------------------------------|
| <i>Temperature (K)</i> | $K_{eq}$<br>( $cm^3 molecule^{-1}$ ) | $k_{uni}$<br>( $s^{-1}$ ) | $k_{2a}$<br>( $cm^3 molecule^{-1} s^{-1}$ ) |
| 200                    | $6.91 \times 10^{-22}$               | $3.5000 \times 10^8$      | $2.418 \times 10^{-13}$                     |
| 220                    | $2.005 \times 10^{-22}$              | $7.000 \times 10^8$       | $1.403 \times 10^{-13}$                     |
| 240                    | $7.140 \times 10^{-23}$              | $1.300 \times 10^9$       | $9.282 \times 10^{-14}$                     |
| 260                    | $2.977 \times 10^{-23}$              | $2.300 \times 10^9$       | $6.848 \times 10^{-14}$                     |
| 280                    | $1.406 \times 10^{-23}$              | $3.700 \times 10^9$       | $5.202 \times 10^{-14}$                     |
| 298                    | $7.796 \times 10^{-24}$              | $5.400 \times 10^9$       | $4.210 \times 10^{-14}$                     |
| 300                    | $7.333 \times 10^{-24}$              | $5.600 \times 10^9$       | $4.107 \times 10^{-14}$                     |
| 320                    | $4.148 \times 10^{-24}$              | $8.300 \times 10^9$       | $3.442 \times 10^{-14}$                     |
| 340                    | $2.508 \times 10^{-24}$              | $1.200 \times 10^{10}$    | $3.009 \times 10^{-14}$                     |
| 360                    | $1.603 \times 10^{-24}$              | $1.600 \times 10^{10}$    | $2.564 \times 10^{-14}$                     |
| 380                    | $1.074 \times 10^{-24}$              | $2.100 \times 10^{10}$    | $2.255 \times 10^{-14}$                     |
| 400                    | $7.485 \times 10^{-25}$              | $2.700 \times 10^{10}$    | $2.021 \times 10^{-14}$                     |

**Table S14:** Calculated equilibrium constant ( $K_{eq}$ ), unimolecular rate coefficient ( $k_{uni}$ ), and total rate coefficients ( $k_{2b}$ ) for the reaction pathway **R2b** in the temperature range 200-400 K at the M06-2X level.

| <i>R2b</i>             |                                      |                           |                                             |
|------------------------|--------------------------------------|---------------------------|---------------------------------------------|
| <i>Temperature (K)</i> | $K_{eq}$<br>( $cm^3 molecule^{-1}$ ) | $k_{uni}$<br>( $s^{-1}$ ) | $k_{2b}$<br>( $cm^3 molecule^{-1} s^{-1}$ ) |
| 200                    | $2.037 \times 10^{-21}$              | $1.200 \times 10^8$       | $2.444 \times 10^{-13}$                     |
| 220                    | $5.663 \times 10^{-22}$              | $2.500 \times 10^8$       | $1.416 \times 10^{-13}$                     |
| 240                    | $1.946 \times 10^{-22}$              | $4.700 \times 10^8$       | $9.146 \times 10^{-14}$                     |
| 260                    | $7.874 \times 10^{-23}$              | $8.400 \times 10^8$       | $6.614 \times 10^{-14}$                     |
| 280                    | $3.623 \times 10^{-23}$              | $1.400 \times 10^9$       | $5.073 \times 10^{-14}$                     |
| 298                    | $1.969 \times 10^{-23}$              | $2.190 \times 10^9$       | $4.312 \times 10^{-14}$                     |
| 300                    | $1.848 \times 10^{-23}$              | $2.200 \times 10^9$       | $4.066 \times 10^{-14}$                     |
| 320                    | $1.025 \times 10^{-23}$              | $3.300 \times 10^9$       | $3.382 \times 10^{-14}$                     |
| 340                    | $6.090 \times 10^{-24}$              | $4.800 \times 10^9$       | $2.923 \times 10^{-14}$                     |
| 360                    | $3.833 \times 10^{-24}$              | $6.700 \times 10^9$       | $2.568 \times 10^{-14}$                     |
| 380                    | $2.533 \times 10^{-24}$              | $9.000 \times 10^9$       | $2.280 \times 10^{-14}$                     |
| 400                    | $1.744 \times 10^{-24}$              | $1.200 \times 10^{10}$    | $2.093 \times 10^{-14}$                     |

**Table S15:** Calculated equilibrium constant ( $K_{eq}$ ), unimolecular rate coefficient ( $k_{uni}$ ), and total rate coefficients (**Total  $k_{2c}$** ) for the reaction pathway **R2c** in the temperature range 200-400 K at the M06-2X level.

| <b>R2c</b>             |                                                                  |                                                       |                                                                         |                                                                                                             |
|------------------------|------------------------------------------------------------------|-------------------------------------------------------|-------------------------------------------------------------------------|-------------------------------------------------------------------------------------------------------------|
| <b>Temperature (K)</b> | <b><math>K_{eq}</math><br/>(<math>cm^3 molecule^{-1}</math>)</b> | <b><math>k_{uni}</math><br/>(<math>s^{-1}</math>)</b> | <b><math>k_{2c}</math><br/>(<math>cm^3 molecule^{-1} s^{-1}</math>)</b> | <b>Total <math>k_{2c}</math><br/>(<math>3 * k_{2c}</math>)<br/>(<math>cm^3 molecule^{-1} s^{-1}</math>)</b> |
| 200                    | $6.620 \times 10^{-24}$                                          | $1.800 \times 10^9$                                   | $1.192 \times 10^{-14}$                                                 | $3.575 \times 10^{-14}$                                                                                     |
| 220                    | $3.849 \times 10^{-24}$                                          | $2.700 \times 10^9$                                   | $1.039 \times 10^{-14}$                                                 | $3.118 \times 10^{-14}$                                                                                     |
| 240                    | $2.447 \times 10^{-24}$                                          | $3.800 \times 10^9$                                   | $9.299 \times 10^{-15}$                                                 | $2.790 \times 10^{-14}$                                                                                     |
| 260                    | $1.666 \times 10^{-24}$                                          | $5.200 \times 10^9$                                   | $8.665 \times 10^{-15}$                                                 | $2.599 \times 10^{-14}$                                                                                     |
| 280                    | $1.198 \times 10^{-24}$                                          | $6.800 \times 10^9$                                   | $8.145 \times 10^{-15}$                                                 | $2.444 \times 10^{-14}$                                                                                     |
| 298                    | $9.239 \times 10^{-25}$                                          | $8.500 \times 10^9$                                   | $7.853 \times 10^{-15}$                                                 | $2.356 \times 10^{-14}$                                                                                     |
| 300                    | $8.993 \times 10^{-25}$                                          | $8.700 \times 10^9$                                   | $7.824 \times 10^{-15}$                                                 | $2.347 \times 10^{-14}$                                                                                     |
| 320                    | $6.995 \times 10^{-25}$                                          | $1.100 \times 10^{10}$                                | $7.695 \times 10^{-15}$                                                 | $2.308 \times 10^{-14}$                                                                                     |
| 340                    | $5.602 \times 10^{-25}$                                          | $1.300 \times 10^{10}$                                | $7.283 \times 10^{-15}$                                                 | $2.185 \times 10^{-14}$                                                                                     |
| 360                    | $4.598 \times 10^{-25}$                                          | $1.500 \times 10^{10}$                                | $6.897 \times 10^{-15}$                                                 | $2.069 \times 10^{-14}$                                                                                     |
| 380                    | $3.852 \times 10^{-25}$                                          | $1.800 \times 10^{10}$                                | $6.934 \times 10^{-15}$                                                 | $2.080 \times 10^{-14}$                                                                                     |
| 400                    | $3.284 \times 10^{-25}$                                          | $2.100 \times 10^{10}$                                | $6.897 \times 10^{-15}$                                                 | $2.069 \times 10^{-14}$                                                                                     |

**Table S16:** Calculated equilibrium constant ( $K_{eq}$ ), unimolecular rate coefficient ( $k_{uni}$ ), and total rate coefficients ( $k_{3a}$ ) for the reaction pathway **R3a** in the temperature range 200-400 K at the M06-2X level.

| <i>R3a</i>             |                                      |                           |                                             |
|------------------------|--------------------------------------|---------------------------|---------------------------------------------|
| <i>Temperature (K)</i> | $K_{eq}$<br>( $cm^3 molecule^{-1}$ ) | $k_{uni}$<br>( $s^{-1}$ ) | $k_{3a}$<br>( $cm^3 molecule^{-1} s^{-1}$ ) |
| 200                    | $8.546 \times 10^{-21}$              | $3.100 \times 10^7$       | $2.649 \times 10^{-13}$                     |
| 220                    | $2.159 \times 10^{-21}$              | $6.900 \times 10^7$       | $1.490 \times 10^{-13}$                     |
| 240                    | $6.852 \times 10^{-22}$              | $1.400 \times 10^8$       | $9.592 \times 10^{-14}$                     |
| 260                    | $2.592 \times 10^{-22}$              | $2.600 \times 10^8$       | $6.738 \times 10^{-14}$                     |
| 280                    | $1.126 \times 10^{-22}$              | $4.700 \times 10^8$       | $5.290 \times 10^{-14}$                     |
| 298                    | $5.845 \times 10^{-23}$              | $7.400 \times 10^8$       | $4.325 \times 10^{-14}$                     |
| 300                    | $5.461 \times 10^{-23}$              | $7.800 \times 10^8$       | $4.259 \times 10^{-14}$                     |
| 320                    | $2.899 \times 10^{-23}$              | $1.200 \times 10^9$       | $3.478 \times 10^{-14}$                     |
| 340                    | $1.657 \times 10^{-23}$              | $1.900 \times 10^9$       | $3.148 \times 10^{-14}$                     |
| 360                    | $1.008 \times 10^{-23}$              | $2.700 \times 10^9$       | $2.721 \times 10^{-14}$                     |
| 380                    | $6.457 \times 10^{-24}$              | $3.800 \times 10^9$       | $2.454 \times 10^{-14}$                     |
| 400                    | $4.325 \times 10^{-24}$              | $5.200 \times 10^9$       | $2.249 \times 10^{-14}$                     |

**Table S17:** Calculated equilibrium constant ( $K_{eq}$ ), unimolecular rate coefficient ( $k_{uni}$ ), and total rate coefficients ( $k_{3b}$ ) for the reaction pathway **R3b** in the temperature range 200-400 K at the M06-2X level.

| <i>R3b</i>             |                                      |                           |                                             |
|------------------------|--------------------------------------|---------------------------|---------------------------------------------|
| <i>Temperature (K)</i> | $K_{eq}$<br>( $cm^3 molecule^{-1}$ ) | $k_{uni}$<br>( $s^{-1}$ ) | $k_{3b}$<br>( $cm^3 molecule^{-1} s^{-1}$ ) |
| 200                    | $7.211 \times 10^{-26}$              | $3.300 \times 10^8$       | $2.380 \times 10^{-17}$                     |
| 220                    | $5.024 \times 10^{-26}$              | $6.100 \times 10^8$       | $3.064 \times 10^{-17}$                     |
| 240                    | $3.713 \times 10^{-26}$              | $1.100 \times 10^9$       | $4.084 \times 10^{-17}$                     |
| 260                    | $2.872 \times 10^{-26}$              | $1.700 \times 10^9$       | $4.882 \times 10^{-17}$                     |
| 280                    | $2.303 \times 10^{-26}$              | $2.600 \times 10^9$       | $5.987 \times 10^{-17}$                     |
| 298                    | $1.935 \times 10^{-26}$              | $3.700 \times 10^9$       | $7.159 \times 10^{-17}$                     |
| 300                    | $1.900 \times 10^{-26}$              | $3.800 \times 10^9$       | $7.221 \times 10^{-17}$                     |
| 320                    | $1.606 \times 10^{-26}$              | $5.300 \times 10^9$       | $8.511 \times 10^{-17}$                     |
| 340                    | $1.384 \times 10^{-26}$              | $7.200 \times 10^9$       | $9.962 \times 10^{-17}$                     |
| 360                    | $1.212 \times 10^{-26}$              | $9.400 \times 10^9$       | $1.139 \times 10^{-16}$                     |
| 380                    | $1.076 \times 10^{-26}$              | $1.200 \times 10^{10}$    | $1.291 \times 10^{-16}$                     |
| 400                    | $9.666 \times 10^{-27}$              | $1.500 \times 10^{10}$    | $1.450 \times 10^{-16}$                     |

**Table S18:** Calculated equilibrium constant ( $K_{eq}$ ), unimolecular rate coefficient ( $k_{uni}$ ), and total rate coefficients (**Total  $k_{3c}$** ) for the reaction pathway R3c in the temperature range 200-400 K at the M06-2X level.

| <i>R3c</i>             |                                      |                           |                                             |                                                                                         |
|------------------------|--------------------------------------|---------------------------|---------------------------------------------|-----------------------------------------------------------------------------------------|
| <i>Temperature (K)</i> | $K_{eq}$<br>( $cm^3 molecule^{-1}$ ) | $k_{uni}$<br>( $s^{-1}$ ) | $k_{3c}$<br>( $cm^3 molecule^{-1} s^{-1}$ ) | <b>Total <math>k_{3c}</math></b><br>( $3 * k_{3c}$ )<br>( $cm^3 molecule^{-1} s^{-1}$ ) |
| 200                    | $2.532 \times 10^{-21}$              | $7.800 \times 10^5$       | $1.975 \times 10^{-15}$                     | $5.924 \times 10^{-15}$                                                                 |
| 220                    | $8.033 \times 10^{-22}$              | $2.200 \times 10^6$       | $1.767 \times 10^{-15}$                     | $5.302 \times 10^{-15}$                                                                 |
| 240                    | $3.083 \times 10^{-22}$              | $5.500 \times 10^6$       | $1.695 \times 10^{-15}$                     | $5.086 \times 10^{-15}$                                                                 |
| 260                    | $1.369 \times 10^{-22}$              | $1.200 \times 10^7$       | $1.643 \times 10^{-15}$                     | $4.930 \times 10^{-15}$                                                                 |
| 280                    | $6.826 \times 10^{-23}$              | $2.400 \times 10^7$       | $1.638 \times 10^{-15}$                     | $4.914 \times 10^{-15}$                                                                 |
| 298                    | $3.949 \times 10^{-23}$              | $4.300 \times 10^7$       | $1.698 \times 10^{-15}$                     | $5.094 \times 10^{-15}$                                                                 |
| 300                    | $3.731 \times 10^{-23}$              | $4.500 \times 10^7$       | $1.679 \times 10^{-15}$                     | $5.037 \times 10^{-15}$                                                                 |
| 320                    | $2.199 \times 10^{-23}$              | $7.800 \times 10^7$       | $1.715 \times 10^{-15}$                     | $5.145 \times 10^{-15}$                                                                 |
| 340                    | $1.378 \times 10^{-23}$              | $1.300 \times 10^8$       | $1.792 \times 10^{-15}$                     | $5.376 \times 10^{-15}$                                                                 |
| 360                    | $9.099 \times 10^{-24}$              | $2.000 \times 10^8$       | $1.820 \times 10^{-15}$                     | $5.459 \times 10^{-15}$                                                                 |
| 380                    | $6.273 \times 10^{-24}$              | $2.900 \times 10^8$       | $1.819 \times 10^{-15}$                     | $5.458 \times 10^{-15}$                                                                 |
| 400                    | $4.488 \times 10^{-24}$              | $4.200 \times 10^8$       | $1.885 \times 10^{-15}$                     | $5.655 \times 10^{-15}$                                                                 |

**Table S19:** Calculated equilibrium constant ( $K_{eq}$ ), unimolecular rate coefficient ( $k_{uni}$ ), and total rate coefficients ( $Total\ k_{4a}$ ) for the reaction pathway **R4a** in the temperature range 200-400 K at the M06-2X level.

| <i>R4a</i>             |                                       |                           |                                               |                                                                          |
|------------------------|---------------------------------------|---------------------------|-----------------------------------------------|--------------------------------------------------------------------------|
| <i>Temperature (K)</i> | $K_{eq}$<br>( $cm^3\ molecule^{-1}$ ) | $k_{uni}$<br>( $s^{-1}$ ) | $k_{4a}$<br>( $cm^3\ molecule^{-1}\ s^{-1}$ ) | $Total\ k_{4a}$<br>( $2 * k_{4a}$ )<br>( $cm^3\ molecule^{-1}\ s^{-1}$ ) |
| 200                    | $3.460 \times 10^{-21}$               | $5.800 \times 10^7$       | $2.007 \times 10^{-13}$                       | $4.013 \times 10^{-13}$                                                  |
| 220                    | $8.997 \times 10^{-22}$               | $1.300 \times 10^8$       | $1.170 \times 10^{-13}$                       | $2.339 \times 10^{-13}$                                                  |
| 240                    | $2.925 \times 10^{-22}$               | $2.600 \times 10^8$       | $7.604 \times 10^{-14}$                       | $1.521 \times 10^{-13}$                                                  |
| 260                    | $1.129 \times 10^{-22}$               | $5.000 \times 10^8$       | $5.645 \times 10^{-14}$                       | $1.129 \times 10^{-13}$                                                  |
| 280                    | $4.990 \times 10^{-23}$               | $8.800 \times 10^8$       | $4.391 \times 10^{-14}$                       | $8.782 \times 10^{-14}$                                                  |
| 298                    | $2.627 \times 10^{-23}$               | $1.400 \times 10^9$       | $3.677 \times 10^{-14}$                       | $7.354 \times 10^{-14}$                                                  |
| 300                    | $2.457 \times 10^{-23}$               | $1.500 \times 10^9$       | $3.686 \times 10^{-14}$                       | $7.372 \times 10^{-14}$                                                  |
| 320                    | $1.322 \times 10^{-23}$               | $2.300 \times 10^9$       | $3.040 \times 10^{-14}$                       | $6.080 \times 10^{-14}$                                                  |
| 340                    | $7.645 \times 10^{-24}$               | $3.500 \times 10^9$       | $2.676 \times 10^{-14}$                       | $5.352 \times 10^{-14}$                                                  |
| 360                    | $4.698 \times 10^{-24}$               | $5.100 \times 10^9$       | $2.396 \times 10^{-14}$                       | $4.792 \times 10^{-14}$                                                  |
| 380                    | $3.038 \times 10^{-24}$               | $7.100 \times 10^9$       | $2.157 \times 10^{-14}$                       | $4.314 \times 10^{-14}$                                                  |
| 400                    | $2.052 \times 10^{-24}$               | $9.700 \times 10^9$       | $1.990 \times 10^{-14}$                       | $3.981 \times 10^{-14}$                                                  |

**Table S20:** Calculated equilibrium constant ( $K_{eq}$ ), unimolecular rate coefficient ( $k_{uni}$ ), and total rate coefficients ( $Total\ k_{4c}$ ) for the reaction pathway **R4c** in the temperature range 200-400 K at the M06-2X level.

| <i>R4c</i>             |                                       |                           |                                               |                                                                                           |
|------------------------|---------------------------------------|---------------------------|-----------------------------------------------|-------------------------------------------------------------------------------------------|
| <i>Temperature (K)</i> | $K_{eq}$<br>( $cm^3\ molecule^{-1}$ ) | $k_{uni}$<br>( $s^{-1}$ ) | $k_{4b}$<br>( $cm^3\ molecule^{-1}\ s^{-1}$ ) | <i>Total <math>k_{4b}</math></i><br>( $3 * k_{4c}$ )<br>( $cm^3\ molecule^{-1}\ s^{-1}$ ) |
| 200                    | $5.71 \times 10^{-21}$                | $5.10 \times 10^7$        | $2.91 \times 10^{-13}$                        | $8.74 \times 10^{-13}$                                                                    |
| 220                    | $1.45 \times 10^{-21}$                | $1.50 \times 10^8$        | $2.17 \times 10^{-13}$                        | $6.53 \times 10^{-13}$                                                                    |
| 240                    | $4.62 \times 10^{-22}$                | $3.90 \times 10^8$        | $1.80 \times 10^{-13}$                        | $5.41 \times 10^{-13}$                                                                    |
| 260                    | $1.75 \times 10^{-22}$                | $9.10 \times 10^8$        | $1.59 \times 10^{-13}$                        | $4.79 \times 10^{-13}$                                                                    |
| 280                    | $7.65 \times 10^{-23}$                | $1.90 \times 10^9$        | $1.45 \times 10^{-13}$                        | $4.36 \times 10^{-13}$                                                                    |
| 298                    | $3.98 \times 10^{-23}$                | $3.50 \times 10^9$        | $1.39 \times 10^{-13}$                        | $4.18 \times 10^{-13}$                                                                    |
| 300                    | $3.72 \times 10^{-23}$                | $3.70 \times 10^9$        | $1.37 \times 10^{-13}$                        | $4.13 \times 10^{-13}$                                                                    |
| 320                    | $1.98 \times 10^{-23}$                | $6.60 \times 10^9$        | $1.30 \times 10^{-13}$                        | $3.92 \times 10^{-13}$                                                                    |
| 340                    | $1.13 \times 10^{-23}$                | $1.10 \times 10^{10}$     | $1.24 \times 10^{-13}$                        | $3.74 \times 10^{-13}$                                                                    |
| 360                    | $6.91 \times 10^{-24}$                | $1.80 \times 10^{10}$     | $1.24 \times 10^{-13}$                        | $3.73 \times 10^{-13}$                                                                    |
| 380                    | $4.44 \times 10^{-24}$                | $2.80 \times 10^{10}$     | $1.24 \times 10^{-13}$                        | $3.73 \times 10^{-13}$                                                                    |
| 400                    | $2.97 \times 10^{-24}$                | $4.10 \times 10^{10}$     | $1.22 \times 10^{-14}$                        | $3.66 \times 10^{-13}$                                                                    |

**Table S21:** Calculated equilibrium constant ( $K_{eq}$ ), unimolecular rate coefficient ( $k_{uni}$ ), and total rate coefficients ( $k_{5a}$ ) for the reaction pathway **R5a** in the temperature range 200-400 K at the M06-2X level.

| <i>R5a</i>             |                                                                  |                                                       |                                                                         |
|------------------------|------------------------------------------------------------------|-------------------------------------------------------|-------------------------------------------------------------------------|
| <i>Temperature (K)</i> | <i><math>K_{eq}</math><br/>(<math>cm^3 molecule^{-1}</math>)</i> | <i><math>k_{uni}</math><br/>(<math>s^{-1}</math>)</i> | <i><math>k_{5a}</math><br/>(<math>cm^3 molecule^{-1} s^{-1}</math>)</i> |
| 200                    | $5.60 \times 10^{-24}$                                           | $7.10 \times 10^9$                                    | $3.98 \times 10^{-14}$                                                  |
| 220                    | $3.60 \times 10^{-24}$                                           | $9.80 \times 10^9$                                    | $3.53 \times 10^{-14}$                                                  |
| 240                    | $2.49 \times 10^{-24}$                                           | $1.30 \times 10^{10}$                                 | $3.24 \times 10^{-14}$                                                  |
| 260                    | $1.82 \times 10^{-24}$                                           | $1.70 \times 10^{10}$                                 | $3.10 \times 10^{-14}$                                                  |
| 280                    | $1.39 \times 10^{-24}$                                           | $2.10 \times 10^{10}$                                 | $2.92 \times 10^{-14}$                                                  |
| 298                    | $1.13 \times 10^{-24}$                                           | $2.50 \times 10^{10}$                                 | $2.82 \times 10^{-14}$                                                  |
| 300                    | $1.10 \times 10^{-24}$                                           | $2.60 \times 10^{10}$                                 | $2.87 \times 10^{-14}$                                                  |
| 320                    | $8.99 \times 10^{-25}$                                           | $3.10 \times 10^{10}$                                 | $2.79 \times 10^{-14}$                                                  |
| 340                    | $7.50 \times 10^{-25}$                                           | $3.70 \times 10^{10}$                                 | $2.78 \times 10^{-14}$                                                  |
| 360                    | $6.38 \times 10^{-25}$                                           | $4.30 \times 10^{10}$                                 | $2.74 \times 10^{-14}$                                                  |
| 380                    | $5.52 \times 10^{-25}$                                           | $5.00 \times 10^{10}$                                 | $2.76 \times 10^{-14}$                                                  |
| 400                    | $4.84 \times 10^{-25}$                                           | $5.70 \times 10^{10}$                                 | $2.76 \times 10^{-14}$                                                  |

**Table S22:** Calculated equilibrium constant ( $K_{eq}$ ), unimolecular rate coefficient ( $k_{uni}$ ), reverse reaction rate coefficient ( $k_r$ ), forward reaction rate coefficient ( $k_f$ ) and total rate coefficients ( $k_{5b}$ ) for the reaction pathway **R5b** in the temperature range 200-400 K at the M06-2X level.

| <b>R5b</b>             |                                                                  |                                                       |                                                          |                                                   |                                                                               |
|------------------------|------------------------------------------------------------------|-------------------------------------------------------|----------------------------------------------------------|---------------------------------------------------|-------------------------------------------------------------------------------|
| <b>Temperature (K)</b> | <b><math>K_{eq}</math><br/>(<math>cm^3 molecule^{-1}</math>)</b> | <b><math>k_{uni}</math><br/>(<math>s^{-1}</math>)</b> | <b><math>k_r</math> (VTST)<br/>(<math>s^{-1}</math>)</b> | <b><math>k_f</math><br/>(<math>s^{-1}</math>)</b> | <b>Total <math>k_{5b}</math><br/>(<math>cm^3 molecule^{-1} s^{-1}</math>)</b> |
| 200                    | $7.91 \times 10^{-22}$                                           | $1.40 \times 10^9$                                    | $2.62 \times 10^{11}$                                    | $2.07 \times 10^{-11}$                            | $1.05 \times 10^{-12}$                                                        |
| 220                    | $2.85 \times 10^{-22}$                                           | $2.80 \times 10^9$                                    | $4.30 \times 10^{11}$                                    | $1.23 \times 10^{-11}$                            | $7.49 \times 10^{-13}$                                                        |
| 240                    | $1.22 \times 10^{-22}$                                           | $5.30 \times 10^9$                                    | $6.42 \times 10^{11}$                                    | $7.82 \times 10^{-12}$                            | $5.96 \times 10^{-13}$                                                        |
| 260                    | $5.92 \times 10^{-23}$                                           | $9.10 \times 10^9$                                    | $9.09 \times 10^{11}$                                    | $5.38 \times 10^{-12}$                            | $4.90 \times 10^{-13}$                                                        |
| 280                    | $3.19 \times 10^{-23}$                                           | $1.50 \times 10^{10}$                                 | $1.20 \times 10^{12}$                                    | $3.84 \times 10^{-12}$                            | $4.25 \times 10^{-13}$                                                        |
| 298                    | $1.96 \times 10^{-23}$                                           | $2.10 \times 10^{10}$                                 | $1.49 \times 10^{12}$                                    | $2.93 \times 10^{-12}$                            | $3.61 \times 10^{-13}$                                                        |
| 300                    | $1.87 \times 10^{-23}$                                           | $2.20 \times 10^{10}$                                 | $1.53 \times 10^{12}$                                    | $2.85 \times 10^{-12}$                            | $3.59 \times 10^{-13}$                                                        |
| 320                    | $1.17 \times 10^{-23}$                                           | $3.20 \times 10^{10}$                                 | $1.89 \times 10^{12}$                                    | $2.21 \times 10^{-12}$                            | $3.19 \times 10^{-13}$                                                        |
| 340                    | $7.70 \times 10^{-24}$                                           | $4.50 \times 10^{10}$                                 | $2.28 \times 10^{12}$                                    | $1.75 \times 10^{-12}$                            | $2.89 \times 10^{-13}$                                                        |
| 360                    | $5.32 \times 10^{-24}$                                           | $6.10 \times 10^{10}$                                 | $2.67 \times 10^{12}$                                    | $1.42 \times 10^{-12}$                            | $2.64 \times 10^{-13}$                                                        |
| 380                    | $3.82 \times 10^{-24}$                                           | $8.10 \times 10^{10}$                                 | $3.04 \times 10^{12}$                                    | $1.16 \times 10^{-12}$                            | $2.45 \times 10^{-13}$                                                        |
| 400                    | $2.84 \times 10^{-24}$                                           | $1.00 \times 10^{11}$                                 | $3.50 \times 10^{12}$                                    | $9.94 \times 10^{-13}$                            | $2.21 \times 10^{-13}$                                                        |

**Table S23:** Calculated equilibrium constant ( $K_{eq}$ ), unimolecular rate coefficient ( $k_{uni}$ ), reverse reaction rate coefficient ( $k_r$ ), forward reaction rate coefficient ( $k_f$ ) and total rate coefficients (**Total  $k_{5c}$** ) for the reaction pathway **R5c** in the temperature range 200-400 K at the M06-2X level.

| <b>R5c</b>             |                                                                  |                                                       |                                                          |                                                   |                                                                               |
|------------------------|------------------------------------------------------------------|-------------------------------------------------------|----------------------------------------------------------|---------------------------------------------------|-------------------------------------------------------------------------------|
| <b>Temperature (K)</b> | <b><math>K_{eq}</math><br/>(<math>cm^3 molecule^{-1}</math>)</b> | <b><math>k_{uni}</math><br/>(<math>s^{-1}</math>)</b> | <b><math>k_r</math> (VTST)<br/>(<math>s^{-1}</math>)</b> | <b><math>k_f</math><br/>(<math>s^{-1}</math>)</b> | <b>Total <math>k_{5c}</math><br/>(<math>cm^3 molecule^{-1} s^{-1}</math>)</b> |
| 200                    | $1.82 \times 10^{-20}$                                           | $5.40 \times 10^9$                                    | $1.51 \times 10^{10}$                                    | $2.74 \times 10^{-10}$                            | $2.17 \times 10^{-10}$                                                        |
| 220                    | $5.06 \times 10^{-21}$                                           | $9.10 \times 10^9$                                    | $2.55 \times 10^{10}$                                    | $1.29 \times 10^{-10}$                            | $1.02 \times 10^{-10}$                                                        |
| 240                    | $1.74 \times 10^{-21}$                                           | $1.40 \times 10^{10}$                                 | $3.97 \times 10^{10}$                                    | $6.91 \times 10^{-11}$                            | $5.41 \times 10^{-11}$                                                        |
| 260                    | $7.06 \times 10^{-22}$                                           | $2.20 \times 10^{10}$                                 | $5.76 \times 10^{10}$                                    | $4.07 \times 10^{-11}$                            | $3.37 \times 10^{-11}$                                                        |
| 280                    | $3.26 \times 10^{-22}$                                           | $3.10 \times 10^{10}$                                 | $7.94 \times 10^{10}$                                    | $2.59 \times 10^{-11}$                            | $2.18 \times 10^{-11}$                                                        |
| 298                    | $1.77 \times 10^{-22}$                                           | $4.10 \times 10^{10}$                                 | $1.02 \times 10^{11}$                                    | $1.81 \times 10^{-11}$                            | $1.56 \times 10^{-11}$                                                        |
| 300                    | $1.66 \times 10^{-22}$                                           | $4.20 \times 10^{10}$                                 | $1.05 \times 10^{11}$                                    | $1.74 \times 10^{-11}$                            | $1.50 \times 10^{-11}$                                                        |
| 320                    | $9.24 \times 10^{-23}$                                           | $5.60 \times 10^{10}$                                 | $1.34 \times 10^{11}$                                    | $1.24 \times 10^{-11}$                            | $1.09 \times 10^{-11}$                                                        |
| 340                    | $5.50 \times 10^{-23}$                                           | $7.20 \times 10^{10}$                                 | $1.66 \times 10^{11}$                                    | $9.12 \times 10^{-12}$                            | $8.28 \times 10^{-12}$                                                        |
| 360                    | $3.46 \times 10^{-23}$                                           | $9.10 \times 10^{10}$                                 | $2.01 \times 10^{11}$                                    | $6.95 \times 10^{-12}$                            | $6.51 \times 10^{-12}$                                                        |
| 380                    | $2.29 \times 10^{-23}$                                           | $1.10 \times 10^{11}$                                 | $2.38 \times 10^{11}$                                    | $5.45 \times 10^{-12}$                            | $5.17 \times 10^{-12}$                                                        |
| 400                    | $1.58 \times 10^{-23}$                                           | $1.40 \times 10^{11}$                                 | $2.78 \times 10^{11}$                                    | $4.38 \times 10^{-12}$                            | $4.40 \times 10^{-12}$                                                        |

**Table S24:** Calculated equilibrium constant ( $K_{eq}$ ), unimolecular rate coefficient ( $k_{uni}$ ), reverse reaction rate coefficient ( $k_r$ ), forward reaction rate coefficient ( $k_f$ ) and total rate coefficients ( $k_{6a}$ ) for the reaction pathway **R6a** in the temperature range 200-400 K at the M06-2X level.

| <i>R6a</i>                |                                      |                           |                              |                        |                                                     |
|---------------------------|--------------------------------------|---------------------------|------------------------------|------------------------|-----------------------------------------------------|
| <i>Temperature</i><br>(K) | $K_{eq}$<br>( $cm^3 molecule^{-1}$ ) | $k_{uni}$<br>( $s^{-1}$ ) | $k_r$ (VTST)<br>( $s^{-1}$ ) | $k_f$<br>( $s^{-1}$ )  | <i>Total k6a</i><br>( $cm^3 molecule^{-1} s^{-1}$ ) |
| 200                       | $6.59 \times 10^{-22}$               | $1.60 \times 10^9$        | $3.54 \times 10^9$           | $2.34 \times 10^{-12}$ | $7.27 \times 10^{-13}$                              |
| 220                       | $2.20 \times 10^{-22}$               | $3.40 \times 10^9$        | $7.48 \times 10^9$           | $1.65 \times 10^{-12}$ | $5.15 \times 10^{-13}$                              |
| 240                       | $8.83 \times 10^{-23}$               | $6.40 \times 10^9$        | $1.40 \times 10^{10}$        | $1.23 \times 10^{-12}$ | $3.88 \times 10^{-13}$                              |
| 260                       | $4.07 \times 10^{-23}$               | $1.10 \times 10^{10}$     | $2.37 \times 10^{10}$        | $9.66 \times 10^{-13}$ | $3.06 \times 10^{-13}$                              |
| 280                       | $2.10 \times 10^{-23}$               | $1.80 \times 10^{10}$     | $3.73 \times 10^{10}$        | $7.82 \times 10^{-13}$ | $2.55 \times 10^{-13}$                              |
| 298                       | $1.25 \times 10^{-23}$               | $2.60 \times 10^{10}$     | $5.30 \times 10^{10}$        | $6.60 \times 10^{-13}$ | $2.17 \times 10^{-13}$                              |
| 300                       | $1.18 \times 10^{-23}$               | $2.70 \times 10^{10}$     | $5.51 \times 10^{10}$        | $6.49 \times 10^{-13}$ | $2.14 \times 10^{-13}$                              |
| 320                       | $7.12 \times 10^{-24}$               | $4.00 \times 10^{10}$     | $7.83 \times 10^{10}$        | $5.57 \times 10^{-13}$ | $1.89 \times 10^{-13}$                              |
| 340                       | $4.56 \times 10^{-24}$               | $5.60 \times 10^{10}$     | $1.06 \times 10^{11}$        | $4.83 \times 10^{-13}$ | $1.67 \times 10^{-13}$                              |
| 360                       | $3.07 \times 10^{-24}$               | $7.60 \times 10^{10}$     | $1.39 \times 10^{11}$        | $4.26 \times 10^{-13}$ | $1.51 \times 10^{-13}$                              |
| 380                       | $2.15 \times 10^{-24}$               | $1.00 \times 10^{11}$     | $1.77 \times 10^{11}$        | $3.81 \times 10^{-13}$ | $1.37 \times 10^{-13}$                              |
| 400                       | $1.56 \times 10^{-24}$               | $1.30 \times 10^{11}$     | $2.20 \times 10^{11}$        | $3.44 \times 10^{-13}$ | $1.28 \times 10^{-13}$                              |

**Table S25:** Calculated equilibrium constant ( $K_{eq}$ ), unimolecular rate coefficient ( $k_{uni}$ ), reverse reaction rate coefficient ( $k_r$ ), forward reaction rate coefficient ( $k_f$ ) and total rate coefficients (**Total  $k_{6c}$** ) for the reaction pathway **R6c** in the temperature range 200-400 K at the M06-2X level.

| <b>R6c</b>             |                                                              |                                                   |                                                      |                                               |                                                                           |
|------------------------|--------------------------------------------------------------|---------------------------------------------------|------------------------------------------------------|-----------------------------------------------|---------------------------------------------------------------------------|
| <b>Temperature (K)</b> | <b><math>K_{eq}</math> (<math>cm^3 molecule^{-1}</math>)</b> | <b><math>k_{uni}</math> (<math>s^{-1}</math>)</b> | <b><math>k_r</math> (VTST) (<math>s^{-1}</math>)</b> | <b><math>k_f</math> (<math>s^{-1}</math>)</b> | <b>Total <math>k_{6c}</math> (<math>cm^3 molecule^{-1} s^{-1}</math>)</b> |
| 200                    | $4.02 \times 10^{-21}$                                       | $7.40 \times 10^9$                                | $3.42 \times 10^8$                                   | $1.38 \times 10^{-12}$                        | $3.95 \times 10^{-12}$                                                    |
| 220                    | $1.31 \times 10^{-21}$                                       | $1.20 \times 10^{10}$                             | $7.73 \times 10^8$                                   | $1.01 \times 10^{-12}$                        | $2.85 \times 10^{-12}$                                                    |
| 240                    | $5.12 \times 10^{-22}$                                       | $1.90 \times 10^{10}$                             | $1.52 \times 10^9$                                   | $7.78 \times 10^{-13}$                        | $2.16 \times 10^{-12}$                                                    |
| 260                    | $2.31 \times 10^{-22}$                                       | $2.80 \times 10^{10}$                             | $2.70 \times 10^9$                                   | $6.25 \times 10^{-13}$                        | $1.71 \times 10^{-12}$                                                    |
| 280                    | $1.17 \times 10^{-22}$                                       | $4.00 \times 10^{10}$                             | $4.42 \times 10^9$                                   | $5.18 \times 10^{-13}$                        | $1.40 \times 10^{-12}$                                                    |
| 298                    | $6.86 \times 10^{-23}$                                       | $5.30 \times 10^{10}$                             | $6.53 \times 10^9$                                   | $4.48 \times 10^{-13}$                        | $1.20 \times 10^{-12}$                                                    |
| 300                    | $6.49 \times 10^{-23}$                                       | $5.40 \times 10^{10}$                             | $6.79 \times 10^9$                                   | $4.41 \times 10^{-13}$                        | $1.17 \times 10^{-12}$                                                    |
| 320                    | $3.87 \times 10^{-23}$                                       | $7.10 \times 10^{10}$                             | $9.90 \times 10^9$                                   | $3.83 \times 10^{-13}$                        | $1.01 \times 10^{-12}$                                                    |
| 340                    | $2.45 \times 10^{-23}$                                       | $9.10 \times 10^{10}$                             | $1.38 \times 10^{10}$                                | $3.38 \times 10^{-13}$                        | $8.80 \times 10^{-13}$                                                    |
| 360                    | $1.63 \times 10^{-23}$                                       | $1.10 \times 10^{11}$                             | $1.85 \times 10^{10}$                                | $3.02 \times 10^{-13}$                        | $7.74 \times 10^{-13}$                                                    |
| 380                    | $1.13 \times 10^{-23}$                                       | $1.40 \times 10^{11}$                             | $2.40 \times 10^{10}$                                | $2.72 \times 10^{-13}$                        | $6.97 \times 10^{-13}$                                                    |
| 400                    | $8.16 \times 10^{-24}$                                       | $1.70 \times 10^{11}$                             | $3.06 \times 10^{10}$                                | $2.50 \times 10^{-13}$                        | $6.35 \times 10^{-13}$                                                    |

**Table S26:** Calculated equilibrium constant ( $K_{eq}$ ), unimolecular rate coefficient ( $k_{uni}$ ), and total rate coefficients ( $k_{7a}$ ) for the reaction pathway **R7a** in the temperature range 200-400 K at the M06-2X level.

| <i>R7a</i>                |                                      |                           |                              |                        |                                                                     |
|---------------------------|--------------------------------------|---------------------------|------------------------------|------------------------|---------------------------------------------------------------------|
| <i>Temperature</i><br>(K) | $K_{eq}$<br>( $cm^3 molecule^{-1}$ ) | $k_{uni}$<br>( $s^{-1}$ ) | $k_r$ (VTST)<br>( $s^{-1}$ ) | $k_f$<br>( $s^{-1}$ )  | <i>Total <math>k_{7a}</math></i><br>( $cm^3 molecule^{-1} s^{-1}$ ) |
| 200                       | $3.81 \times 10^{-21}$               | $4.50 \times 10^8$        | $1.85 \times 10^{11}$        | $7.04 \times 10^{-10}$ | $1.71 \times 10^{-12}$                                              |
| 220                       | $1.20 \times 10^{-21}$               | $1.10 \times 10^9$        | $2.29 \times 10^{11}$        | $2.75 \times 10^{-10}$ | $1.31 \times 10^{-12}$                                              |
| 240                       | $4.59 \times 10^{-22}$               | $2.30 \times 10^9$        | $2.74 \times 10^{11}$        | $1.26 \times 10^{-10}$ | $1.05 \times 10^{-12}$                                              |
| 260                       | $2.03 \times 10^{-22}$               | $4.40 \times 10^9$        | $3.26 \times 10^{11}$        | $6.62 \times 10^{-11}$ | $8.81 \times 10^{-13}$                                              |
| 280                       | $1.01 \times 10^{-22}$               | $7.60 \times 10^9$        | $3.71 \times 10^{11}$        | $3.75 \times 10^{-11}$ | $7.52 \times 10^{-13}$                                              |
| 298                       | $5.83 \times 10^{-23}$               | $1.20 \times 10^{10}$     | $4.12 \times 10^{11}$        | $2.40 \times 10^{-11}$ | $6.79 \times 10^{-13}$                                              |
| 300                       | $5.50 \times 10^{-23}$               | $1.90 \times 10^{10}$     | $4.17 \times 10^{11}$        | $2.30 \times 10^{-11}$ | $1.00 \times 10^{-12}$                                              |
| 320                       | $3.24 \times 10^{-23}$               | $1.90 \times 10^{10}$     | $4.63 \times 10^{11}$        | $1.50 \times 10^{-11}$ | $5.91 \times 10^{-13}$                                              |
| 340                       | $2.02 \times 10^{-23}$               | $2.80 \times 10^{10}$     | $5.06 \times 10^{11}$        | $1.02 \times 10^{-11}$ | $5.37 \times 10^{-13}$                                              |
| 360                       | $1.33 \times 10^{-23}$               | $4.00 \times 10^{10}$     | $5.42 \times 10^{11}$        | $7.22 \times 10^{-12}$ | $4.97 \times 10^{-13}$                                              |
| 380                       | $9.17 \times 10^{-24}$               | $5.40 \times 10^{10}$     | $5.71 \times 10^{11}$        | $5.23 \times 10^{-12}$ | $4.52 \times 10^{-13}$                                              |
| 400                       | $6.55 \times 10^{-24}$               | $7.20 \times 10^{10}$     | $6.10 \times 10^{11}$        | $3.99 \times 10^{-12}$ | $4.22 \times 10^{-13}$                                              |

**Table S27:** Calculated equilibrium constant ( $K_{eq}$ ), unimolecular rate coefficient ( $k_{uni}$ ), and total rate coefficients ( $k_{7b}$ ) for the reaction pathway **R7b** in the temperature range 200-400 K at the M06-2X level.

| <i>R7b</i>             |                                                                  |                                                       |                                                                         |
|------------------------|------------------------------------------------------------------|-------------------------------------------------------|-------------------------------------------------------------------------|
| <i>Temperature (K)</i> | <i><math>K_{eq}</math><br/>(<math>cm^3 molecule^{-1}</math>)</i> | <i><math>k_{uni}</math><br/>(<math>s^{-1}</math>)</i> | <i><math>k_{7b}</math><br/>(<math>cm^3 molecule^{-1} s^{-1}</math>)</i> |
| 200                    | $5.20 \times 10^{-24}$                                           | $1.50 \times 10^9$                                    | $7.80 \times 10^{-15}$                                                  |
| 220                    | $3.14 \times 10^{-24}$                                           | $2.70 \times 10^9$                                    | $8.48 \times 10^{-15}$                                                  |
| 240                    | $2.06 \times 10^{-24}$                                           | $4.40 \times 10^9$                                    | $9.08 \times 10^{-15}$                                                  |
| 260                    | $1.44 \times 10^{-24}$                                           | $6.70 \times 10^9$                                    | $9.68 \times 10^{-15}$                                                  |
| 280                    | $1.06 \times 10^{-24}$                                           | $9.60 \times 10^9$                                    | $1.02 \times 10^{-14}$                                                  |
| 298                    | $8.37 \times 10^{-25}$                                           | $1.30 \times 10^{10}$                                 | $1.09 \times 10^{-14}$                                                  |
| 300                    | $8.16 \times 10^{-25}$                                           | $1.30 \times 10^{10}$                                 | $1.06 \times 10^{-14}$                                                  |
| 320                    | $6.46 \times 10^{-25}$                                           | $1.70 \times 10^{10}$                                 | $1.10 \times 10^{-14}$                                                  |
| 340                    | $5.26 \times 10^{-25}$                                           | $2.20 \times 10^{10}$                                 | $1.16 \times 10^{-14}$                                                  |
| 360                    | $4.38 \times 10^{-25}$                                           | $2.70 \times 10^{10}$                                 | $1.18 \times 10^{-14}$                                                  |
| 380                    | $3.71 \times 10^{-25}$                                           | $3.30 \times 10^{10}$                                 | $1.23 \times 10^{-14}$                                                  |
| 400                    | $3.20 \times 10^{-25}$                                           | $3.90 \times 10^{10}$                                 | $1.25 \times 10^{-14}$                                                  |

**Table S28:** Calculated equilibrium constant ( $K_{eq}$ ), unimolecular rate coefficient ( $k_{uni}$ ), reverse reaction rate coefficient ( $k_r$ ), forward reaction rate coefficient ( $k_f$ ) and total rate coefficients (**Total  $k_{7c}$** ) for the reaction pathway **R7c** in the temperature range 200-400 K at the M06-2X level.

| <b>R7c</b>             |                                                              |                                                   |                                                      |                                               |                                                                           |
|------------------------|--------------------------------------------------------------|---------------------------------------------------|------------------------------------------------------|-----------------------------------------------|---------------------------------------------------------------------------|
| <b>Temperature (K)</b> | <b><math>K_{eq}</math> (<math>cm^3 molecule^{-1}</math>)</b> | <b><math>k_{uni}</math> (<math>s^{-1}</math>)</b> | <b><math>k_r</math> (VTST) (<math>s^{-1}</math>)</b> | <b><math>k_f</math> (<math>s^{-1}</math>)</b> | <b>Total <math>k_{7c}</math> (<math>cm^3 molecule^{-1} s^{-1}</math>)</b> |
| 200                    | $1.81 \times 10^{-20}$                                       | $2.30 \times 10^{10}$                             | $3.41 \times 10^5$                                   | $6.17 \times 10^{-15}$                        | $1.85 \times 10^{-14}$                                                    |
| 220                    | $4.91 \times 10^{-21}$                                       | $3.40 \times 10^{10}$                             | $1.59 \times 10^6$                                   | $7.78 \times 10^{-15}$                        | $2.33 \times 10^{-14}$                                                    |
| 240                    | $1.65 \times 10^{-21}$                                       | $4.80 \times 10^{10}$                             | $5.74 \times 10^6$                                   | $9.49 \times 10^{-15}$                        | $2.85 \times 10^{-14}$                                                    |
| 260                    | $6.58 \times 10^{-22}$                                       | $6.40 \times 10^{10}$                             | $1.71 \times 10^7$                                   | $1.13 \times 10^{-14}$                        | $3.38 \times 10^{-14}$                                                    |
| 280                    | $2.99 \times 10^{-22}$                                       | $8.40 \times 10^{10}$                             | $4.38 \times 10^7$                                   | $1.31 \times 10^{-14}$                        | $3.92 \times 10^{-14}$                                                    |
| 298                    | $1.61 \times 10^{-22}$                                       | $1.00 \times 10^{11}$                             | $9.19 \times 10^7$                                   | $1.48 \times 10^{-14}$                        | $4.39 \times 10^{-14}$                                                    |
| 300                    | $1.51 \times 10^{-22}$                                       | $1.10 \times 10^{11}$                             | $9.92 \times 10^7$                                   | $1.49 \times 10^{-14}$                        | $4.48 \times 10^{-14}$                                                    |
| 320                    | $8.26 \times 10^{-23}$                                       | $1.30 \times 10^{11}$                             | $2.03 \times 10^8$                                   | $1.68 \times 10^{-14}$                        | $5.03 \times 10^{-14}$                                                    |
| 340                    | $4.86 \times 10^{-23}$                                       | $1.60 \times 10^{11}$                             | $3.84 \times 10^8$                                   | $1.87 \times 10^{-14}$                        | $5.59 \times 10^{-14}$                                                    |
| 360                    | $3.03 \times 10^{-23}$                                       | $1.90 \times 10^{11}$                             | $6.76 \times 10^8$                                   | $2.05 \times 10^{-14}$                        | $6.13 \times 10^{-14}$                                                    |
| 380                    | $1.99 \times 10^{-23}$                                       | $2.20 \times 10^{11}$                             | $1.12 \times 10^9$                                   | $2.24 \times 10^{-14}$                        | $6.67 \times 10^{-14}$                                                    |
| 400                    | $1.36 \times 10^{-23}$                                       | $2.60 \times 10^{11}$                             | $1.77 \times 10^9$                                   | $2.41 \times 10^{-14}$                        | $7.18 \times 10^{-14}$                                                    |

**Table S29:** Calculated equilibrium constant ( $K_{eq}$ ), unimolecular rate coefficient ( $k_{uni}$ ), reverse reaction rate coefficient ( $k_r$ ), forward reaction rate coefficient ( $k_f$ ) and total rate coefficients (**Total  $k_{8a}$** ) for the reaction pathway **R8a** in the temperature range 200-400 K at the M06-2X level.

| <i>R8a</i>                |                                                         |                           |                              |                        |                                                                                          |
|---------------------------|---------------------------------------------------------|---------------------------|------------------------------|------------------------|------------------------------------------------------------------------------------------|
| <i>Temperature</i><br>(K) | $K_{eq}$<br>( $cm^3$<br><i>molecule</i> <sup>-1</sup> ) | $k_{uni}$<br>( $s^{-1}$ ) | $k_r$ (VTST)<br>( $s^{-1}$ ) | $k_f$<br>( $s^{-1}$ )  | <b>Total <math>k_{8a}</math></b><br>( $cm^3$<br><i>molecule</i> <sup>-1</sup> $s^{-1}$ ) |
| 200                       | $2.73 \times 10^{-21}$                                  | $1.90 \times 10^8$        | $2.22 \times 10^8$           | $6.07 \times 10^{-13}$ | $5.60 \times 10^{-13}$                                                                   |
| 220                       | $8.67 \times 10^{-22}$                                  | $4.70 \times 10^8$        | $5.88 \times 10^8$           | $5.10 \times 10^{-13}$ | $4.53 \times 10^{-13}$                                                                   |
| 240                       | $3.33 \times 10^{-22}$                                  | $1.00 \times 10^9$        | $1.33 \times 10^9$           | $4.41 \times 10^{-13}$ | $3.79 \times 10^{-13}$                                                                   |
| 260                       | $1.48 \times 10^{-22}$                                  | $1.90 \times 10^9$        | $2.64 \times 10^9$           | $3.91 \times 10^{-13}$ | $3.27 \times 10^{-13}$                                                                   |
| 280                       | $7.39 \times 10^{-23}$                                  | $3.40 \times 10^9$        | $4.76 \times 10^9$           | $3.52 \times 10^{-13}$ | $2.93 \times 10^{-13}$                                                                   |
| 298                       | $4.28 \times 10^{-23}$                                  | $5.30 \times 10^9$        | $7.58 \times 10^9$           | $3.24 \times 10^{-13}$ | $2.67 \times 10^{-13}$                                                                   |
| 300                       | $4.04 \times 10^{-23}$                                  | $5.50 \times 10^9$        | $7.96 \times 10^9$           | $3.22 \times 10^{-13}$ | $2.63 \times 10^{-13}$                                                                   |
| 320                       | $2.38 \times 10^{-23}$                                  | $8.50 \times 10^9$        | $1.24 \times 10^{10}$        | $2.96 \times 10^{-13}$ | $2.41 \times 10^{-13}$                                                                   |
| 340                       | $1.50 \times 10^{-23}$                                  | $1.30 \times 10^{10}$     | $1.85 \times 10^{10}$        | $2.76 \times 10^{-13}$ | $2.28 \times 10^{-13}$                                                                   |
| 360                       | $9.88 \times 10^{-24}$                                  | $1.80 \times 10^{10}$     | $2.62 \times 10^{10}$        | $2.59 \times 10^{-13}$ | $2.11 \times 10^{-13}$                                                                   |
| 380                       | $6.81 \times 10^{-24}$                                  | $2.40 \times 10^{10}$     | $3.60 \times 10^{10}$        | $2.45 \times 10^{-13}$ | $1.96 \times 10^{-13}$                                                                   |
| 400                       | $4.87 \times 10^{-24}$                                  | $3.20 \times 10^{10}$     | $4.74 \times 10^{10}$        | $2.31 \times 10^{-13}$ | $1.86 \times 10^{-13}$                                                                   |

**Table S30:** Calculated equilibrium constant ( $K_{eq}$ ), unimolecular rate coefficient ( $k_{uni}$ ), reverse reaction rate coefficient ( $k_r$ ), forward reaction rate coefficient ( $k_f$ ) and total rate coefficients (**Total  $k_{8c}$** ) for the reaction pathway **R8c** in the temperature range 200-400 K at the M06-2X level.

| <b>R8c</b>             |                                                              |                                                   |                                                      |                                               |                                                                           |
|------------------------|--------------------------------------------------------------|---------------------------------------------------|------------------------------------------------------|-----------------------------------------------|---------------------------------------------------------------------------|
| <b>Temperature (K)</b> | <b><math>K_{eq}</math> (<math>cm^3 molecule^{-1}</math>)</b> | <b><math>k_{uni}</math> (<math>s^{-1}</math>)</b> | <b><math>k_r</math> (VTST) (<math>s^{-1}</math>)</b> | <b><math>k_f</math> (<math>s^{-1}</math>)</b> | <b>Total <math>k_{8c}</math> (<math>cm^3 molecule^{-1} s^{-1}</math>)</b> |
| 200                    | $2.21 \times 10^{-22}$                                       | $4.80 \times 10^{10}$                             | $2.98 \times 10^9$                                   | $6.60 \times 10^{-13}$                        | $1.86 \times 10^{-12}$                                                    |
| 220                    | $8.84 \times 10^{-23}$                                       | $7.30 \times 10^{10}$                             | $6.53 \times 10^9$                                   | $5.77 \times 10^{-13}$                        | $1.59 \times 10^{-12}$                                                    |
| 240                    | $4.11 \times 10^{-23}$                                       | $1.10 \times 10^{11}$                             | $1.26 \times 10^{10}$                                | $5.18 \times 10^{-13}$                        | $1.40 \times 10^{-12}$                                                    |
| 260                    | $2.15 \times 10^{-23}$                                       | $1.50 \times 10^{11}$                             | $2.21 \times 10^{10}$                                | $4.75 \times 10^{-13}$                        | $1.24 \times 10^{-12}$                                                    |
| 280                    | $1.23 \times 10^{-23}$                                       | $1.90 \times 10^{11}$                             | $3.59 \times 10^{10}$                                | $4.42 \times 10^{-13}$                        | $1.12 \times 10^{-12}$                                                    |
| 298                    | $7.95 \times 10^{-24}$                                       | $2.40 \times 10^{11}$                             | $5.27 \times 10^{10}$                                | $4.19 \times 10^{-13}$                        | $1.03 \times 10^{-12}$                                                    |
| 300                    | $7.60 \times 10^{-24}$                                       | $2.50 \times 10^{11}$                             | $5.48 \times 10^{10}$                                | $4.17 \times 10^{-13}$                        | $1.03 \times 10^{-12}$                                                    |
| 320                    | $4.98 \times 10^{-24}$                                       | $3.10 \times 10^{11}$                             | $7.95 \times 10^{10}$                                | $3.96 \times 10^{-13}$                        | $9.45 \times 10^{-13}$                                                    |
| 340                    | $3.43 \times 10^{-24}$                                       | $3.90 \times 10^{11}$                             | $1.11 \times 10^{11}$                                | $3.79 \times 10^{-13}$                        | $8.86 \times 10^{-13}$                                                    |
| 360                    | $2.46 \times 10^{-24}$                                       | $4.70 \times 10^{11}$                             | $1.49 \times 10^{11}$                                | $3.65 \times 10^{-13}$                        | $8.32 \times 10^{-13}$                                                    |
| 380                    | $1.82 \times 10^{-24}$                                       | $5.60 \times 10^{11}$                             | $1.94 \times 10^{11}$                                | $3.53 \times 10^{-13}$                        | $7.88 \times 10^{-13}$                                                    |
| 400                    | $1.39 \times 10^{-24}$                                       | $6.60 \times 10^{11}$                             | $2.47 \times 10^{11}$                                | $3.43 \times 10^{-13}$                        | $7.50 \times 10^{-13}$                                                    |

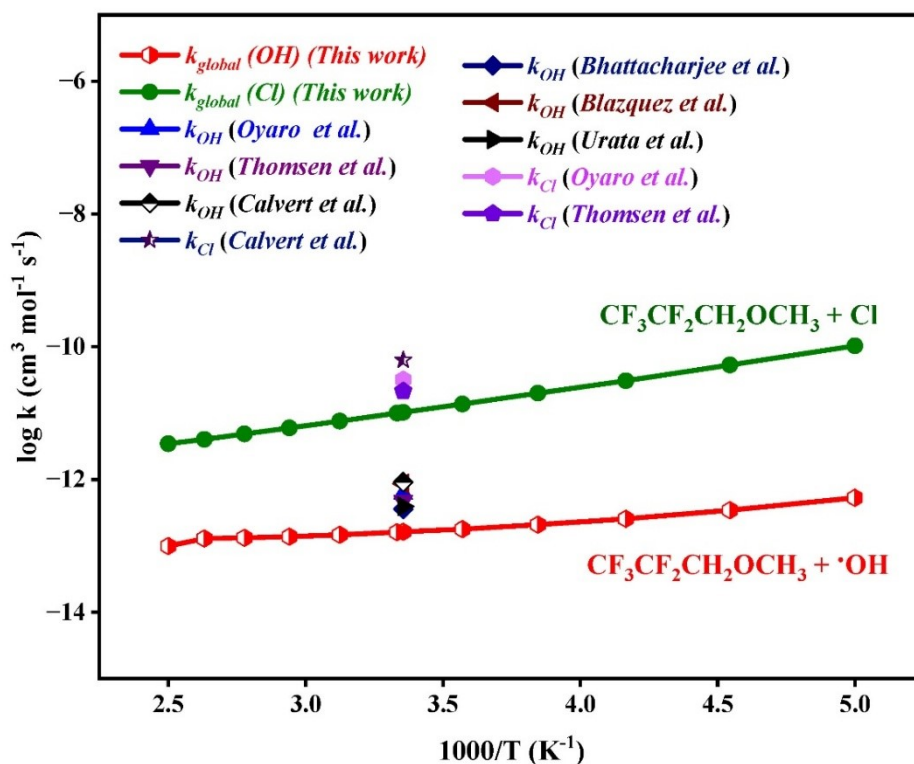

**Figure S6:** Comparison of the previously reported rate coefficients ( $\text{cm}^3 \text{molecule}^{-1} \text{s}^{-1}$ ) from the works of Oyaró *et al.*<sup>1</sup>, Thomsen *et al.*<sup>2</sup>, Urata *et al.*<sup>3</sup>, Blázquez *et al.*<sup>4</sup>, Calvert *et al.*<sup>5</sup>, and Bhattacharjee *et al.*<sup>6</sup> for the reaction of HFE-365mcf3 with  $\cdot\text{OH}$  and Cl atoms obtained at the M06-2X level in the 200–400 K temperature range, with the computed rate coefficients as a function of  $1000/T$  ( $\text{K}^{-1}$ ).

## References

1. N. Oyaró, S. R. Sellevåg and C. J. Nielsen, *Environ. Sci. Technol.*, **2004**, *38*, 5567–5576.
2. D. Thomsen, V. Andersen, O. Nielsen and T. Wallington, *Phys. Chem. Chem. Phys.*, **2011**, *13*, 2758–2764.
3. S. Urata, A. Takada, T. Uchimaru and A. K. Chandra, *Chem. Phys. Lett.*, **2003**, *368*, 215–223.
4. S. Blázquez, S. Espinosa, M. Antiñolo, J. Albaladejo and E. Jiménez, *Phys. Chem. Chem. Phys.*, **2022**, *24*, 14354–14364.
5. J. G. Calvert, J. J. Orlando, W. R. Stockwell and T. J. Wallington, *The mechanisms of reactions influencing atmospheric ozone*, Oxford University Press, 2015.
6. D. Bhattacharjee, B. K. Mishra and R. C. Deka, *J. Mol. Model.*, **2015**, *21*, 1–8.

#### Notes S4: Radiative efficiency (RE) calculations

##### Frequencies and their Intensities

The radiative efficiency (RE) was calculated using the vibrational frequencies in the atmospheric window of 600-1600  $\text{cm}^{-1}$  with respect to their corresponding intensities. The reactant is more effective if it absorbs in this range [1,2,3]. Studies have revealed that even if this compound absorbs at another wavelength with strong absorption, the additional absorption will not contribute significantly to radiative forcing. All the frequencies are in  $\text{cm}^{-1}$ .

**Table S31:** Frequencies and intensities of HFE-365mcf3 calculated at the M06-2X/6-311++G(d,p) level of theory.

| <i>Frequencies</i> | <i>Adjusted</i>       | <i>Intensity</i> | <i>(<math>\sigma</math>)</i><br><i>Intensity <math>\times 1.66 \times 10^{-19}</math></i> | <i>(Total)</i><br><i>Adjusted <math>\times \sigma</math></i> |
|--------------------|-----------------------|------------------|-------------------------------------------------------------------------------------------|--------------------------------------------------------------|
| 57.66              | $9.34 \times 10^{-3}$ | 0.122            | $2.025 \times 10^{-20}$                                                                   | $1.892 \times 10^{-22}$                                      |
| 87.36              | $2.29 \times 10^{-2}$ | 1.244            | $2.065 \times 10^{-19}$                                                                   | $4.729 \times 10^{-21}$                                      |
| 124.56             | $1.41 \times 10^{-1}$ | 4.066            | $6.750 \times 10^{-19}$                                                                   | $9.517 \times 10^{-20}$                                      |
| 180.38             | $2.78 \times 10^{-1}$ | 0.948            | $1.574 \times 10^{-19}$                                                                   | $4.375 \times 10^{-20}$                                      |
| 221.08             | $8.47 \times 10^{-2}$ | 1.443            | $2.395 \times 10^{-19}$                                                                   | $2.029 \times 10^{-20}$                                      |
| 233.03             | $3.96 \times 10^{-1}$ | 1.148            | $1.906 \times 10^{-19}$                                                                   | $7.546 \times 10^{-20}$                                      |
| 275.63             | $4.31 \times 10^{-1}$ | 11.422           | $1.896 \times 10^{-18}$                                                                   | $8.172 \times 10^{-19}$                                      |
| 303.8              | $2.89 \times 10^{-1}$ | 0.512            | $8.499 \times 10^{-20}$                                                                   | $2.456 \times 10^{-20}$                                      |
| 353.79             | $7.39 \times 10^{-1}$ | 1.413            | $2.346 \times 10^{-19}$                                                                   | $1.733 \times 10^{-19}$                                      |
| 391.7              | 1.29                  | 2.139            | $3.551 \times 10^{-19}$                                                                   | $4.580 \times 10^{-19}$                                      |
| 434.23             | 1.51                  | 2.474            | $4.107 \times 10^{-19}$                                                                   | $6.201 \times 10^{-19}$                                      |
| 478.31             | 1.98                  | 5.934            | $9.850 \times 10^{-19}$                                                                   | $1.950 \times 10^{-18}$                                      |
| 534.87             | 2.29                  | 13.069           | $2.169 \times 10^{-18}$                                                                   | $4.968 \times 10^{-18}$                                      |
| 598.78             | 1.17                  | 2.185            | $3.627 \times 10^{-19}$                                                                   | $4.244 \times 10^{-19}$                                      |
| 629.14             | $4.35 \times 10^{-1}$ | 41.275           | $6.852 \times 10^{-18}$                                                                   | $2.980 \times 10^{-18}$                                      |
| 671.53             | $4.81 \times 10^{-3}$ | 17.467           | $2.900 \times 10^{-18}$                                                                   | $1.395 \times 10^{-20}$                                      |
| 793.23             | 2.77                  | 3.711            | $6.160 \times 10^{-19}$                                                                   | $1.706 \times 10^{-18}$                                      |
| 953.2              | 2.82                  | 2.988            | $4.960 \times 10^{-19}$                                                                   | $1.399 \times 10^{-18}$                                      |
| 998.11             | 2.36                  | 60.170           | $9.988 \times 10^{-18}$                                                                   | $2.357 \times 10^{-17}$                                      |
| 1125.22            | 2.20                  | 112.303          | $1.864 \times 10^{-17}$                                                                   | $4.101 \times 10^{-17}$                                      |
| 1178               | 1.75                  | 137.600          | $2.284 \times 10^{-17}$                                                                   | $3.997 \times 10^{-17}$                                      |
| 1188.6             | 1.69                  | 14.525           | $2.411 \times 10^{-18}$                                                                   | $4.075 \times 10^{-18}$                                      |
| 1227.34            | 1.62                  | 27.208           | $4.517 \times 10^{-18}$                                                                   | $7.317 \times 10^{-18}$                                      |
| 1240.55            | 1.20                  | 195.608          | $3.247 \times 10^{-17}$                                                                   | $3.897 \times 10^{-17}$                                      |
| 1259.54            | $3.79 \times 10^{-1}$ | 161.594          | $2.682 \times 10^{-17}$                                                                   | $1.017 \times 10^{-17}$                                      |
| 1272.44            | $3.59 \times 10^{-1}$ | 261.476          | $4.341 \times 10^{-17}$                                                                   | $1.558 \times 10^{-17}$                                      |
| 1284.18            | $5.53 \times 10^{-1}$ | 151.220          | $2.510 \times 10^{-17}$                                                                   | $1.388 \times 10^{-17}$                                      |
| 1330.78            | $6.45 \times 10^{-1}$ | 106.991          | $1.776 \times 10^{-17}$                                                                   | $1.146 \times 10^{-17}$                                      |
| 1409.8             | $2.51 \times 10^{-1}$ | 19.951           | $3.312 \times 10^{-18}$                                                                   | $8.313 \times 10^{-19}$                                      |
| 1451.43            | $1.18 \times 10^{-1}$ | 11.236           | $1.865 \times 10^{-18}$                                                                   | $2.201 \times 10^{-19}$                                      |

|         |                       |        |                         |                         |
|---------|-----------------------|--------|-------------------------|-------------------------|
| 1480.39 | $1.07 \times 10^{-1}$ | 5.129  | $8.514 \times 10^{-19}$ | $9.110 \times 10^{-20}$ |
| 1493.58 | $8.81 \times 10^{-2}$ | 13.996 | $2.323 \times 10^{-18}$ | $2.047 \times 10^{-19}$ |
| 1506.03 | $1.57 \times 10^{-2}$ | 4.410  | $7.321 \times 10^{-19}$ | $1.149 \times 10^{-20}$ |
| 1521.69 | $1.51 \times 10^{-2}$ | 11.192 | $1.858 \times 10^{-18}$ | $2.805 \times 10^{-20}$ |

$$\begin{aligned} \text{Total} &= 2.232 \times 10^{-16} \times 10^{-3} \times 10^{18} \\ &= 0.2232 \text{ Wm}^{-2} \text{ ppb}^{-1} \end{aligned}$$

$$f = 0.277564$$

$$\text{Corrected RE} = 0.2232 \times f = 0.061896 \text{ Wm}^{-2} \text{ ppb}^{-1}$$

$$\begin{aligned} \text{Again, 10\% temperature adjustment} &= (0.0618 + 0.00618) \text{ Wm}^{-2} \text{ ppb}^{-1} \\ &= 0.068 \text{ Wm}^{-2} \text{ ppb}^{-1} \end{aligned}$$

The AGWP<sub>CO2</sub> (H) values for THs 20 and 100 years are  $2.434 \times 10^{-14}$  and  $8.947 \times 10^{-14}$  W m<sup>-2</sup> year kg<sup>-1</sup>, respectively [1].

### **References**

1. K. P. Shine and G. Myhre, *J. Adv. Model. Earth Syst.*, **2020**, *12*, e2019MS001951 (1-17).
2. Ø. Hodnebrog, M. Etminan, J. Fuglestvedt, G. Marston, G. Myhre, C. Nielsen, K. P. Shine and T. Wallington, *Rev. Geophys.*, **2013**, *51*, 300–378.
3. Ø. Hodnebrog, B. Aamaas, J. S. Fuglestvedt, G. Marston, G. Myhre, C. J. Nielsen, M. Sandstad, K. P. Shine and T. J. Wallington, *Rev. Geophys.*, **2020**, *58*, e2019RG000691 (1-30).

**Table S32:** Corrected zero-point energies (EE+ZPE), enthalpies (H), and Gibbs free energies (G) of the species involved in the loss processes of product radical P1A, in the presence and absence of O<sub>2</sub>. Energies are in Hartree and all the calculations are in M06-2X/6-311++G(d,p) level of theory.

| <b>PIA</b>      |                                |               |            |            |                       |           |
|-----------------|--------------------------------|---------------|------------|------------|-----------------------|-----------|
| <i>Pathways</i> | <i>Species</i>                 | <i>EE+ZPE</i> | <i>H</i>   | <i>G</i>   | <i>ΔH</i>             | <i>ΔG</i> |
|                 | <b>P1a</b>                     | -729.0915     | -729.0802  | -729.1290  |                       |           |
|                 | <b>AIM1a</b>                   | -1189.3474    | -1189.3355 | -1189.3853 | -78.4400              | -67.7546  |
|                 | <b>AIM2a</b>                   | -879.4398     | -879.4270  | -879.4795  | -28.5622              | -16.3249  |
|                 | <b>AIM3a</b>                   | -1084.5151    | -1084.4999 | -1084.5584 | -22.1176              | -8.4552   |
|                 | <b>AIM4a</b>                   | -804.2930     | -804.2813  | -804.3308  | -12.3960              | -13.3298  |
| <b>C-C</b>      | <b>AIM4a-TS1</b>               | -804.2832     | -804.2715  | -804.3213  | <b><i>6.1326</i></b>  |           |
|                 | <b>AIM4a-PC1</b>               | -804.3057     | -804.2923  | -804.3480  |                       |           |
|                 | <b>AIM5a</b>                   | -575.3237     | -575.3167  | -575.3553  | -3.6409               | -17.0058  |
|                 | <b>AIM6a</b>                   | -228.9759     | -228.9705  | -229.0025  |                       |           |
| <b>C-H</b>      | <b>AIM4a-TS2</b>               | -804.2697     | -804.2580  | -804.3072  | 14.5949               |           |
|                 | <b>AIM4a-PC2</b>               | -804.2836     | -804.2709  | -804.3224  |                       |           |
|                 | <b>AIM7a</b>                   | -803.7874     | -803.7759  | -803.8251  | 6.0499                | -2.0325   |
| <b>C-O</b>      | <b>AIM4a-TS3</b>               | -804.2578     | -804.2461  | -804.2954  | <b><i>22.0636</i></b> |           |
|                 | <b>AIM4a-PC3</b>               | -804.2766     | -804.2631  | -804.3179  |                       |           |
|                 | <b>AIM8a</b>                   | -689.2749     | -689.2658  | -689.3088  | 16.5019               | 3.6622    |
|                 | <b>AIM9a</b>                   | -114.9932     | -114.9893  | -115.0161  |                       |           |
|                 | <b>O<sub>2</sub> (Triplet)</b> | -150.3046     | -150.3013  | -150.3245  |                       |           |
|                 | <b>Cl</b>                      | -460.1327     | -460.1303  | -460.1483  |                       |           |
|                 | <b>NO</b>                      | -129.8755     | -129.8722  | -129.8955  |                       |           |
|                 | <b>NO<sub>2</sub></b>          | -205.0415     | -205.0376  | -205.0655  |                       |           |
|                 | <b>H</b>                       | -0.4982       | -0.4958    | -0.5088    |                       |           |

\*Values in both **Bold** and *Italics* are the Barrier heights.

**Table S33:** Corrected zero-point energies (EE+ZPE), enthalpies (H), and Gibbs free energies (G) of the species involved in the loss processes of product radical AIM5, in the presence and absence of O<sub>2</sub>. Energies are in Hartree and all the calculations are in M06-2X/6-311++G(d,p) level of theory.

| AIM5                                          |                                |               |           |           |                       |           |
|-----------------------------------------------|--------------------------------|---------------|-----------|-----------|-----------------------|-----------|
| <i>Pathways</i>                               | <i>Species</i>                 | <i>EE+ZPE</i> | <i>H</i>  | <i>G</i>  | <i>ΔH</i>             | <i>ΔG</i> |
|                                               | <b>AIM5a</b>                   | -575.3237     | -575.3167 | -575.3553 |                       |           |
|                                               | <b>SIM1</b>                    | -725.6825     | -725.6737 | -725.7167 | -34.9842              | -23.0990  |
| <b>NO<sub>2</sub> addition</b>                | <b>SIM2</b>                    | -930.7627     | -930.7514 | -930.8007 | -25.1341              | -11.6850  |
| <b>NO addition<br/>NO<sub>2</sub> removal</b> | <b>SIM3</b>                    | -650.5349     | -650.5271 | -650.5673 | -11.8212              | -12.9049  |
| <b>C-F</b>                                    | <b>SIM3-TS1</b>                | -650.4839     | -650.4759 | -650.5168 | <b><i>31.9747</i></b> |           |
|                                               | <b>SIM4</b>                    | -550.7676     | -550.7607 | -550.7986 | 26.9752               | 17.6151   |
|                                               | <b>F</b>                       | -99.7258      | -99.7234  | -99.7406  |                       |           |
| <b>C-C</b>                                    | <b>SIM3-TS2</b>                | -650.5211     | -650.5142 | -650.5523 | <b><i>8.6416</i></b>  |           |
|                                               | <b>SIM5</b>                    | -337.5447     | -337.5404 | -337.5714 | -3.1156               | -16.2358  |
|                                               | <b>CF2O</b>                    | -312.9960     | -312.9917 | -313.0217 |                       |           |
|                                               | <b>O<sub>2</sub> (Triplet)</b> | -150.3046     | -150.3013 | -150.3245 |                       |           |
|                                               | <b>Cl</b>                      | -460.1327     | -460.1303 | -460.1483 |                       |           |
|                                               | <b>NO</b>                      | -129.8755     | -129.8722 | -129.8955 |                       |           |
|                                               | <b>NO<sub>2</sub></b>          | -205.0415     | -205.0376 | -205.0655 |                       |           |
|                                               | <b>H</b>                       | -0.4982       | -0.4958   | -0.5088   |                       |           |

\*Values in both **Bold** and *Italics* are the Barrier heights.

**Table S34:** Corrected zero-point energies (EE+ZPE), enthalpies (H), and Gibbs free energies (G) of the species involved in the loss processes of product radical P1B, in the presence and absence of O<sub>2</sub>. Energies are in Hartree and all the calculations are in M06-2X/6-311++G(d,p) level of theory.

| <b>P1B</b>           |                                |               |            |            |                       |           |
|----------------------|--------------------------------|---------------|------------|------------|-----------------------|-----------|
| <i>Pathways</i>      | <i>Species</i>                 | <i>EE+ZPE</i> | <i>H</i>   | <i>G</i>   | <i>ΔH</i>             | <i>ΔG</i> |
|                      | <b>P1c</b>                     | -729.0871     | -729.0762  | -729.1237  |                       |           |
|                      | <b>AIM1b</b>                   | -1189.3506    | -1189.3391 | -1189.3889 | -83.1640              | -73.3464  |
|                      | <b>AIM2b</b>                   | -879.4438     | -879.4314  | -879.4847  | -33.8315              | -22.9032  |
|                      | <b>NO<sub>2</sub></b>          | -205.0415     | -205.0376  | -205.0655  |                       |           |
|                      | <b>AIM3b</b>                   | -1084.5259    | -1084.5112 | -1084.5693 | -26.4887              | -12.0195  |
|                      | <b>NO</b>                      | -129.8755     | -129.8722  | -129.8955  |                       |           |
|                      | <b>AIM4b</b>                   | -804.3007     | -804.2894  | -804.3385  | -14.7015              | -14.9168  |
| <b>C-H</b>           | <b>AIM4b-TS1</b>               | -804.2752     | -804.2636  | -804.3138  | <b><i>16.0074</i></b> |           |
|                      | <b>AIM5b</b>                   | -803.7933     | -803.7822  | -803.8311  | 7.1418                | -0.8861   |
|                      | <b>H</b>                       | -0.4982       | -0.4958    | -0.5088    |                       |           |
| <b>O<sub>2</sub></b> | <b>O<sub>2</sub> (Triplet)</b> | -150.3046     | -150.3013  | -150.3245  |                       |           |
|                      | <b>AIM4b-TS2</b>               | -954.5929     | -954.5788  | -954.6367  | <b><i>7.7574</i></b>  |           |
|                      | <b>AIM6b</b>                   | -803.7933     | -803.7822  | -803.8311  | -40.0000              | -41.5318  |
|                      | <b>HOO</b>                     | -150.8760     | -150.8722  | -150.8981  |                       |           |
|                      | <b>Cl</b>                      | -460.1327     | -460.1303  | -460.1483  |                       |           |

\*Values in both **Bold** and *Italics* are the Barrier heights.

**Table S35:** Rotational constants of the species involved in the reaction pathways **R1-R8** at the M06-2X/6-311++G(d,p) level of theory.

| <i><b>RI</b></i>      |                                          |          |          |
|-----------------------|------------------------------------------|----------|----------|
| <i><b>Species</b></i> | <i><b>Rotational constants (GHz)</b></i> |          |          |
| <b>A1</b>             | 1.8426                                   | 1.1605   | 1.0175   |
| <b>OH</b>             | 564.2914                                 | -        | -        |
| <b>CR1a</b>           | 1.43881                                  | 0.8475   | 0.70337  |
| <b>TS1a</b>           | 1.49140                                  | 0.87335  | 0.72017  |
| <b>PC1a</b>           | 1.49657                                  | 0.79526  | 0.67741  |
| <b>P1a</b>            | 1.90351                                  | 1.1286   | 1.0178   |
| <b>CR1b</b>           | 1.4394                                   | 0.8820   | 0.7028   |
| <b>TS1b</b>           | 1.3296                                   | 0.8311   | 0.7782   |
| <b>PC1b</b>           | 1.3732                                   | 0.8786   | 0.6901   |
| <b>P1b</b>            | 1.9807                                   | 0.9969   | 0.8871   |
| <b>CR1c</b>           | 1.6726                                   | 0.6517   | 0.6236   |
| <b>TS1c</b>           | 1.7590                                   | 0.6829   | 0.6201   |
| <b>PC1c</b>           | 1.6895                                   | 0.6648   | 0.6154   |
| <b>P1c</b>            | 1.8680                                   | 1.1785   | 1.0282   |
| <b>H<sub>2</sub>O</b> | 829.6254                                 | 432.6793 | 284.3702 |

| <i>R2</i>      |                                   |          |          |
|----------------|-----------------------------------|----------|----------|
| <i>Species</i> | <i>Rotational constants (GHz)</i> |          |          |
| <b>A2</b>      | 1.9109                            | 1.0395   | 0.9023   |
| <b>OH</b>      | 564.2914                          | -        | -        |
| <b>CR2a</b>    | 1.4381                            | 0.88155  | 0.70218  |
| <b>TS2a</b>    | 1.3295                            | 0.83109  | 0.77817  |
| <b>PC2a</b>    | 1.3734                            | 0.87846  | 0.69004  |
| <b>P2a</b>     | 1.9806                            | 0.99692  | 0.88705  |
| <b>CR2b</b>    | 1.5570                            | 0.7890   | 0.6815   |
| <b>TS2b</b>    | 1.5570                            | 0.7589   | 0.6815   |
| <b>PC2b</b>    | 1.5432                            | 0.7414   | 0.6386   |
| <b>P2b</b>     | 1.9560                            | 1.0143   | 0.8893   |
| <b>CR2c</b>    | 1.5361                            | 0.6447   | 0.5907   |
| <b>TS2c</b>    | 1.7469                            | 0.6348   | 0.5655   |
| <b>PC2c</b>    | 1.5343                            | 0.7567   | 0.6526   |
| <b>P2c</b>     | 1.9114                            | 1.0796   | 0.9325   |
| <b>H2O</b>     | 829.6254                          | 432.6793 | 284.3702 |

| <b>R3</b>             |                                   |          |          |
|-----------------------|-----------------------------------|----------|----------|
| <b>Species</b>        | <b>Rotational constants (GHz)</b> |          |          |
| <b>A3</b>             | 2.4101                            | 0.8951   | 0.8724   |
| <b>OH</b>             | 564.2914                          | -        | -        |
| <b>CR3a</b>           | 1.69179                           | 0.67739  | 0.63295  |
| <b>TS3a</b>           | 1.53648                           | 0.76530  | 0.66946  |
| <b>PC3a</b>           | 1.53754                           | 0.70417  | 0.64142  |
| <b>P3a</b>            | 2.2817                            | 0.86015  | 0.80724  |
| <b>CR3b</b>           | 1.4705                            | 0.8260   | 0.6825   |
| <b>TS3b</b>           | 1.5098                            | 0.8354   | 0.7093   |
| <b>PC3b</b>           | 1.4625                            | 0.7899   | 0.6760   |
| <b>P3b</b>            | 2.4115                            | 0.9288   | 0.8862   |
| <b>CR3c</b>           | 1.8277                            | 0.6537   | 0.6007   |
| <b>TS3c</b>           | 1.7529                            | 0.7046   | 0.6253   |
| <b>PC3c</b>           | 1.4408                            | 0.8340   | 0.6777   |
| <b>P3c</b>            | 2.4152                            | 0.9028   | 0.8940   |
| <b>H<sub>2</sub>O</b> | 829.6254                          | 432.6793 | 284.3702 |

| <i>R4</i>             |                                   |          |          |
|-----------------------|-----------------------------------|----------|----------|
| <i>Species</i>        | <i>Rotational constants (GHz)</i> |          |          |
| <b>A4</b>             | 2.3390                            | 0.8434   | 0.8026   |
| <b>OH</b>             | 564.2914                          | -        | -        |
| <b>CR4a</b>           | 1.6905                            | 0.6780   | 0.6333   |
| <b>TS4a</b>           | 1.5361                            | 0.7653   | 0.6694   |
| <b>PC4a</b>           | 1.5389                            | 0.7023   | 0.6403   |
| <b>P4a</b>            | 2.2813                            | 0.8603   | 0.8073   |
| <b>CR4c</b>           | 1.6896                            | 0.6783   | 0.6336   |
| <b>TS4c</b>           | 1.6793                            | 0.6310   | 0.5783   |
| <b>PC4c</b>           | 1.5637                            | 0.7152   | 0.6398   |
| <b>P4c</b>            | 2.3799                            | 0.8664   | 0.8248   |
| <b>H<sub>2</sub>O</b> | 829.6254                          | 432.6793 | 284.3702 |

| <i>R5</i>      |                                   |        |        |
|----------------|-----------------------------------|--------|--------|
| <i>Species</i> | <i>Rotational constants (GHz)</i> |        |        |
| <b>A1</b>      | 1.8426                            | 1.1605 | 1.0175 |
| <b>Cl</b>      | 0.0000                            | -      | -      |
| <b>CR5a</b>    | 1.2891                            | 0.6080 | 0.5132 |
| <b>TS5a</b>    | 1.4362                            | 0.6136 | 0.5280 |
| <b>PC5a</b>    | 1.4957                            | 0.5108 | 0.4554 |
| <b>P5a</b>     | 1.9034                            | 1.1286 | 1.0178 |
| <b>CR5b</b>    | 1.2491                            | 0.7216 | 0.5632 |
| <b>TS5b</b>    | 1.1225                            | 0.6760 | 0.5877 |
| <b>PC5b</b>    | 1.1268                            | 0.6061 | 0.5139 |
| <b>P5b</b>     | 1.9547                            | 1.0154 | 0.8897 |
| <b>CR5c</b>    | 1.5389                            | 0.5063 | 0.4988 |
| <b>TS5c</b>    | 1.7974                            | 0.4391 | 0.4139 |
| <b>PC5c</b>    | 1.6949                            | 0.4239 | 0.4034 |
| <b>P5c</b>     | 1.8685                            | 1.1780 | 1.0279 |
| <b>HCl</b>     | 314.1814                          | -      | -      |

| <b>R6</b>      |                                   |        |        |
|----------------|-----------------------------------|--------|--------|
| <i>Species</i> | <i>Rotational constants (GHz)</i> |        |        |
| <b>A2</b>      | 1.9109                            | 1.0395 | 0.9023 |
| <b>Cl</b>      | -                                 | -      | -      |
| <b>CR6a</b>    | 1.2492                            | 0.7223 | 0.5636 |
| <b>TS6a</b>    | 1.1208                            | 0.6771 | 0.5882 |
| <b>PC6a</b>    | 1.1202                            | 0.6070 | 0.5141 |
| <b>P6a</b>     | 1.9806                            | 0.9970 | 0.8871 |
| <b>CR6b†</b>   | 1.2862                            | 0.5969 | 0.5605 |
| <b>TS6b†</b>   | 1.3414                            | 0.5910 | 0.4875 |
| <b>PC6b†</b>   | 1.1552                            | 0.5760 | 0.4895 |
| <b>P6b†</b>    | 1.9722                            | 0.9915 | 0.8841 |
| <b>CR6c</b>    | 1.3646                            | 0.6020 | 0.5631 |
| <b>TS6c</b>    | 1.7325                            | 0.4284 | 0.3950 |
| <b>PC6c</b>    | 1.5586                            | 0.4566 | 0.4128 |
| <b>P6c</b>     | 1.9117                            | 1.0799 | 0.9325 |
| <b>HCl</b>     | 314.1814                          | -      | -      |

†: Calculations at MP2/6-311++G(d,p) level of theory.

| <b>R7</b>      |                                   |        |        |
|----------------|-----------------------------------|--------|--------|
| <i>Species</i> | <i>Rotational constants (GHz)</i> |        |        |
| <b>A3</b>      | 2.4101                            | 0.8951 | 0.8724 |
| <b>CR7a</b>    | 1.5014                            | 0.5349 | 0.4852 |
| <b>TS7a</b>    | 1.1349                            | 0.6849 | 0.5252 |
| <b>PC7a</b>    | 1.2011                            | 0.5837 | 0.4919 |
| <b>P7a</b>     | 2.2811                            | 0.8602 | 0.8073 |
| <b>CR7b</b>    | 1.0432                            | 0.7408 | 0.5323 |
| <b>TS7b</b>    | 1.1273                            | 0.6949 | 0.5324 |
| <b>PC7b</b>    | 1.0789                            | 0.6841 | 0.5194 |
| <b>P7b</b>     | 2.4114                            | 0.9288 | 0.8862 |
| <b>CR7c</b>    | 1.6169                            | 0.4774 | 0.4300 |
| <b>TS7c</b>    | 1.5346                            | 0.4474 | 0.4029 |
| <b>PC7c</b>    | 1.4068                            | 0.4537 | 0.3997 |
| <b>P7c</b>     | 2.3919                            | 0.9012 | 0.8913 |
| <b>HCl</b>     | 314.1814                          | -      | -      |

| <b>R8</b>      |                                   |        |        |
|----------------|-----------------------------------|--------|--------|
| <i>Species</i> | <i>Rotational constants (GHz)</i> |        |        |
| <b>A4</b>      | 2.3390                            | 0.8434 | 0.8026 |
| <b>Cl</b>      | -                                 | -      | -      |
| <b>CR8a</b>    | 1.5006                            | 0.5354 | 0.4855 |
| <b>TS8a</b>    | 1.1367                            | 0.6832 | 0.5250 |
| <b>PC8a</b>    | 1.2103                            | 0.5753 | 0.4876 |
| <b>P8a</b>     | 2.2816                            | 0.8602 | 0.8072 |
| <b>CR8c</b>    | 1.5005                            | 0.5353 | 0.4854 |
| <b>TS8c</b>    | 1.4939                            | 0.4394 | 0.3957 |
| <b>PC8c</b>    | 1.2903                            | 0.5086 | 0.4393 |
| <b>P8c</b>     | 2.3795                            | 0.8665 | 0.8247 |
| <b>HCl</b>     | 314.1814                          | -      | -      |

| <b>Degradation products (P1)</b> |                                   |         |         |
|----------------------------------|-----------------------------------|---------|---------|
| <i>Species</i>                   | <i>Rotational constants (GHz)</i> |         |         |
| <b>AIM1a</b>                     | 1.4106                            | 0.7685  | 0.6149  |
| <b>AIM2a</b>                     | 1.4507                            | 0.7302  | 0.6118  |
| <b>AIM3a</b>                     | 1.0484                            | 0.3930  | 0.3406  |
| <b>AIM4a</b>                     | 1.6071                            | 0.9507  | 0.7739  |
| <b>AIM4a-TS1</b>                 | 1.5929                            | 0.9579  | 0.8091  |
| <b>AIM4a-PC1</b>                 | 1.4728                            | 0.7840  | 0.7055  |
| <b>AIM5a</b>                     | 3.7742                            | 2.4239  | 1.9899  |
| <b>AIM6a</b>                     | 20.2452                           | 6.9719  | 5.3609  |
| <b>AIM4a-TS2</b>                 | 1.6459                            | 0.9255  | 0.7687  |
| <b>AIM4a-PC2</b>                 | 1.6814                            | 0.8582  | 0.8077  |
| <b>AIM7a</b>                     | 1.6802                            | 0.9023  | 0.8062  |
| <b>AIM4a-TS3</b>                 | 1.5311                            | 1.0277  | 0.8369  |
| <b>AIM4a-PC3</b>                 | 1.4063                            | 0.9433  | 0.7368  |
| <b>AIM8a</b>                     | 2.2924                            | 1.4630  | 1.3277  |
| <b>AIM9a</b>                     | 157.6658                          | 27.9715 | 27.7941 |
| <b>O<sub>2</sub> (Triplet)</b>   | 44.7098                           | -       | -       |

| <i>Degradation products (AIM5a)</i> |                                   |         |         |
|-------------------------------------|-----------------------------------|---------|---------|
| <i>Species</i>                      | <i>Rotational constants (GHz)</i> |         |         |
| <b>SIM1</b>                         | 2.6264                            | 1.3602  | 1.3074  |
| <b>SIM2</b>                         | 1.9913                            | 0.6024  | 0.5644  |
| <b>SIM3</b>                         | 2.8811                            | 1.9085  | 1.8931  |
| <b>SIM3-TS1</b>                     | 2.7717                            | 1.8627  | 1.7309  |
| <b>SIM4</b>                         | 3.8595                            | 2.5001  | 2.0676  |
| <b>SIM3-TS2</b>                     | 2.9031                            | 1.7403  | 1.7280  |
| <b>SIM5</b>                         | 10.9370                           | 10.9355 | 5.6621  |
| <b>CF2O</b>                         | 11.8638                           | 11.8427 | 5.9266  |
| <b>NO</b>                           | 52.2319                           |         |         |
| <b>NO2</b>                          | 252.1291                          | 13.2818 | 12.6171 |

| <i>Degradation products (P1b)</i> |                                   |         |         |
|-----------------------------------|-----------------------------------|---------|---------|
| <i>Species</i>                    | <i>Rotational constants (GHz)</i> |         |         |
| <b>AIM1b</b>                      | 1.7906                            | 0.5570  | 0.5197  |
| <b>AIM2b</b>                      | 1.7982                            | 0.5431  | 0.5098  |
| <b>AIM3b</b>                      | 1.2398                            | 0.3008  | 0.2935  |
| <b>AIM4b</b>                      | 1.8082                            | 0.8187  | 0.7446  |
| <b>AIM4b-TS1</b>                  | 1.9181                            | 0.7694  | 0.7049  |
| <b>AIM5b</b>                      | 1.9460                            | 0.7860  | 0.7182  |
| <b>AIM4b-TS2</b>                  | 1.6323                            | 0.3830  | 0.3725  |
| <b>AIM6b</b>                      | 1.9493                            | 0.7850  | 0.7177  |
| <b>HOO</b>                        | 631.7962                          | 34.7076 | 32.9002 |
